# Supplementary material for: Clinical Significance and Prognostic Value of miR-28-5p in Colon Cancer
Source: Dis Markers. 2020 May 20;2020:3159831. doi: 10.1155/2020/3159831 (PMC7256711; doi:10.1155/2020/3159831)
Supplement: Supplementary Materials — The mirDIP database identified the target genes of miR-28-5p. [file 3159831.f1.csv]

Generated at: 2020/01/13 08:50:04
mirDIP version: 4.1.11.1.
Database version: 4.1.0.3
Gene Symbol -
Micro RNA - hsa-miR-28-5p
Minimum Score - Very High
Results (711)
Gene Symbol	Uniprot	Pseudogene	MicroRNA	Integrated Score	Number of Sources	Score Class	Sources
RAP1B	P61224		hsa-miR-28-5p	0.864256021	23	Very High	BCmicrO|BiTargeting|CoMeTa|Cupid|DIANA|ElMMo3|MBStar|MAMI|microrna.org|MirAncesTar|miRDB|MirMAP|MirSNP|MirTar|miRTar2GO|Mirza-G|MultiMiTar|PACCMIT|RepTar|RNAhybrid|TargetRank|TargetScan|TargetSpy
FOXJ3	Q9UPW0		hsa-miR-28-5p	0.81484068	19	Very High	BCmicrO|CoMeTa|Cupid|DIANA|ElMMo3|MBStar|MAMI|microrna.org|MirAncesTar|miRDB|MirMAP|MirSNP|MirTar|miRTar2GO|Mirza-G|MultiMiTar|PACCMIT|RepTar|TargetScan
SSRP1	Q08945		hsa-miR-28-5p	0.812227259	18	Very High	BCmicrO|CoMeTa|Cupid|DIANA|ElMMo3|MAMI|microrna.org|MirAncesTar|mirbase|miRDB|MirMAP|Mirza-G|MultiMiTar|PACCMIT|RepTar|RNAhybrid|TargetRank|TargetScan
WIPF2	Q8TF74		hsa-miR-28-5p	0.804602213	20	Very High	BCmicrO|BiTargeting|CoMeTa|DIANA|ElMMo3|MBStar|MAMI|microrna.org|MirAncesTar|miRDB|MirMAP|MirSNP|MirTar|miRTar2GO|Mirza-G|MultiMiTar|PACCMIT|RepTar|RNAhybrid|TargetScan
ETF1	P62495		hsa-miR-28-5p	0.801914647	21	Very High	BCmicrO|BiTargeting|CoMeTa|Cupid|DIANA|ElMMo3|microrna.org|MirAncesTar|miRDB|MirMAP|MirSNP|MirTar|miRTar2GO|Mirza-G|MultiMiTar|PACCMIT|RepTar|RNAhybrid|TargetRank|TargetScan|TargetSpy
KIAA0355	O15063		hsa-miR-28-5p	0.797222019	18	Very High	BCmicrO|Cupid|DIANA|ElMMo3|MBStar|microrna.org|MirAncesTar|miRDB|MirMAP|MirTar|miRTar2GO|MultiMiTar|PACCMIT|PITA|RepTar|TargetRank|TargetScan|TargetSpy
TXNL1	O43396		hsa-miR-28-5p	0.795959685	20	Very High	BCmicrO|BiTargeting|CoMeTa|DIANA|ElMMo3|MBStar|MAMI|microrna.org|MirAncesTar|mirbase|miRDB|MirMAP|MirTar|miRTar2GO|MultiMiTar|PACCMIT|RepTar|RNAhybrid|TargetScan|TargetSpy
NFE2L2	Q16236		hsa-miR-28-5p	0.787136852	19	Very High	BCmicrO|CoMeTa|Cupid|ElMMo3|MBStar|microrna.org|MirAncesTar|mirbase|miRDB|MirMAP|MirTar|miRTar2GO|Mirza-G|MultiMiTar|RepTar|RNAhybrid|TargetRank|TargetScan|TargetSpy
GPM6A	P51674		hsa-miR-28-5p	0.780858587	19	Very High	BCmicrO|CoMeTa|Cupid|DIANA|ElMMo3|MBStar|microrna.org|MirAncesTar|miRDB|MirMAP|MirTar|Mirza-G|MultiMiTar|PACCMIT|RepTar|RNAhybrid|TargetRank|TargetScan|TargetSpy
NR4A3	Q92570		hsa-miR-28-5p	0.765965873	19	Very High	BCmicrO|BiTargeting|CoMeTa|Cupid|DIANA|ElMMo3|MAMI|microrna.org|MirAncesTar|miRDB|MirMAP|MirSNP|MirTar|miRTar2GO|Mirza-G|MultiMiTar|RepTar|TargetRank|TargetSpy
NNAT	Q16517		hsa-miR-28-5p	0.760425325	19	Very High	BCmicrO|BiTargeting|CoMeTa|Cupid|DIANA|ElMMo3|MAMI|microrna.org|MirAncesTar|mirbase|miRDB|MirMAP|Mirza-G|MultiMiTar|PITA|RepTar|RNAhybrid|TargetRank|TargetScan
GON4L	Q3T8J9		hsa-miR-28-5p	0.757370618	21	Very High	BCmicrO|BiTargeting|CoMeTa|Cupid|DIANA|ElMMo3|MAMI|microrna.org|MirAncesTar|mirbase|miRDB|MirMAP|MirTar|Mirza-G|MultiMiTar|PITA|RepTar|RNA22|RNAhybrid|TargetRank|TargetScan
EN2	P19622		hsa-miR-28-5p	0.746008338	16	Very High	BCmicrO|CoMeTa|DIANA|ElMMo3|microrna.org|MirAncesTar|miRDB|MirMAP|MirTar|Mirza-G|MultiMiTar|PACCMIT|PITA|RepTar|TargetRank|TargetScan
CNTFR	P26992		hsa-miR-28-5p	0.739726275	21	Very High	BCmicrO|BiTargeting|CoMeTa|DIANA|ElMMo3|MBStar|MAMI|microrna.org|MirAncesTar|mirbase|miRDB|MirMAP|MirSNP|Mirza-G|MultiMiTar|PACCMIT|PITA|RepTar|RNAhybrid|TargetRank|TargetScan
ADGRL1	O94910		hsa-miR-28-5p	0.730807306	18	Very High	BCmicrO|CoMeTa|Cupid|DIANA|ElMMo3|MBStar|microrna.org|MirAncesTar|miRDB|MirMAP|miRTar2GO|Mirza-G|MultiMiTar|PACCMIT|RepTar|RNAhybrid|TargetRank|TargetScan
YWHAZ	P63104		hsa-miR-28-5p	0.730578818	19	Very High	BCmicrO|BiTargeting|CoMeTa|Cupid|DIANA|ElMMo3|MBStar|microrna.org|MirAncesTar|miRDB|MirMAP|miRTar2GO|Mirza-G|MultiMiTar|PITA|RepTar|RNAhybrid|TargetScan|TargetSpy
TNS3	Q68CZ2		hsa-miR-28-5p	0.730030911	18	Very High	BCmicrO|CoMeTa|DIANA|ElMMo3|MBStar|microrna.org|MirAncesTar|miRDB|MirMAP|miRTar2GO|Mirza-G|MultiMiTar|PACCMIT|RepTar|RNAhybrid|TargetRank|TargetScan|TargetSpy
DYRK1A	Q13627		hsa-miR-28-5p	0.729288678	20	Very High	BCmicrO|BiTargeting|CoMeTa|Cupid|DIANA|ElMMo3|MBStar|microrna.org|MirAncesTar|miRDB|MirMAP|MirSNP|MirTar|miRTar2GO|Mirza-G|MultiMiTar|PACCMIT|RNAhybrid|TargetRank|TargetSpy
RPRD1A	Q96P16		hsa-miR-28-5p	0.725093064	18	Very High	BCmicrO|CoMeTa|Cupid|DIANA|ElMMo3|MBStar|microrna.org|MirAncesTar|miRDB|MirMAP|MirTar|miRTar2GO|Mirza-G|RepTar|RNAhybrid|TargetRank|TargetScan|TargetSpy
ZKSCAN8	Q15776		hsa-miR-28-5p	0.719455135	18	Very High	BCmicrO|BiTargeting|DIANA|ElMMo3|microrna.org|MirAncesTar|miRDB|MirMAP|MirTar|miRTar2GO|Mirza-G|MultiMiTar|PITA|RepTar|RNAhybrid|TargetRank|TargetScan|TargetSpy
UBE2R2	Q712K3		hsa-miR-28-5p	0.717487416	15	Very High	BCmicrO|Cupid|DIANA|ElMMo3|MAMI|microrna.org|MirAncesTar|miRDB|MirMAP|MirSNP|MirTar|Mirza-G|MultiMiTar|RepTar|TargetRank
HOXB3	P14651		hsa-miR-28-5p	0.707690565	20	Very High	BCmicrO|BiTargeting|CoMeTa|DIANA|ElMMo3|MBStar|microrna.org|MirAncesTar|mirbase|miRDB|MirMAP|MirTar|Mirza-G|MultiMiTar|PITA|RepTar|RNAhybrid|TargetRank|TargetScan|TargetSpy
TLN2	Q9Y4G6		hsa-miR-28-5p	0.707323608	20	Very High	BCmicrO|BiTargeting|CoMeTa|DIANA|ElMMo3|MBStar|MAMI|microrna.org|MirAncesTar|mirbase|miRDB|MirMAP|Mirza-G|MultiMiTar|PACCMIT|PITA|RepTar|RNAhybrid|TargetRank|TargetScan
SHANK2	Q9UPX8		hsa-miR-28-5p	0.705347014	19	Very High	BCmicrO|BiTargeting|CoMeTa|Cupid|DIANA|ElMMo3|MBStar|microrna.org|MirAncesTar|miRDB|MirMAP|MirTar|Mirza-G|MultiMiTar|RepTar|RNAhybrid|TargetRank|TargetScan|TargetSpy
GNG12	Q9UBI6		hsa-miR-28-5p	0.705286476	19	Very High	BCmicrO|CoMeTa|DIANA|ElMMo3|MBStar|microrna.org|MirAncesTar|miRDB|MirMAP|MirSNP|miRTar2GO|Mirza-G|MultiMiTar|PITA|RepTar|RNA22|TargetRank|TargetScan|TargetSpy
MTSS1	O43312		hsa-miR-28-5p	0.704620433	17	Very High	BCmicrO|CoMeTa|Cupid|DIANA|ElMMo3|microrna.org|MirAncesTar|miRDB|MirMAP|MirTar|Mirza-G|MultiMiTar|PACCMIT|RepTar|RNAhybrid|TargetScan|TargetSpy
CBFB	Q13951		hsa-miR-28-5p	0.704533512	18	Very High	BCmicrO|BiTargeting|CoMeTa|DIANA|ElMMo3|MBStar|microrna.org|MirAncesTar|miRDB|MirMAP|MirTar|miRTar2GO|Mirza-G|MultiMiTar|RepTar|RNAhybrid|TargetRank|TargetSpy
SYT11	Q9BT88		hsa-miR-28-5p	0.704288883	18	Very High	BCmicrO|BiTargeting|CoMeTa|Cupid|DIANA|ElMMo3|MBStar|microrna.org|MirAncesTar|miRDB|MirMAP|miRTar2GO|MultiMiTar|RepTar|RNA22|TargetRank|TargetScan|TargetSpy
TMEM260	Q9NX78		hsa-miR-28-5p	0.704019121	17	Very High	BCmicrO|BiTargeting|CoMeTa|DIANA|ElMMo3|microrna.org|MirAncesTar|miRDB|MirMAP|Mirza-G|MultiMiTar|PACCMIT|RepTar|RNAhybrid|TargetRank|TargetScan|TargetSpy
NRAS	P01111		hsa-miR-28-5p	0.703933334	19	Very High	BCmicrO|CoMeTa|Cupid|DIANA|ElMMo3|MBStar|microrna.org|MirAncesTar|miRDB|MirMAP|MirTar|miRTar2GO|Mirza-G|MultiMiTar|PACCMIT|PITA|RepTar|RNA22|TargetScan
DCX	O43602		hsa-miR-28-5p	0.703642686	18	Very High	BCmicrO|BiTargeting|CoMeTa|DIANA|ElMMo3|MBStar|MAMI|MirAncesTar|miRDB|MirMAP|MirTar|Mirza-G|MultiMiTar|PITA|RepTar|RNAhybrid|TargetRank|TargetSpy
CRIM1	Q9NZV1		hsa-miR-28-5p	0.702570307	18	Very High	BCmicrO|CoMeTa|Cupid|DIANA|ElMMo3|MBStar|microrna.org|MirAncesTar|miRDB|MirMAP|miRTar2GO|Mirza-G|MultiMiTar|PACCMIT|RepTar|RNAhybrid|TargetScan|TargetSpy
SESN1	Q9Y6P5		hsa-miR-28-5p	0.700180218	19	Very High	BCmicrO|BiTargeting|CoMeTa|DIANA|ElMMo3|MBStar|MAMI|microrna.org|MirAncesTar|mirbase|miRDB|MirMAP|MirTar|miRTar2GO|Mirza-G|MultiMiTar|PITA|RepTar|RNAhybrid
CYTH2	Q99418		hsa-miR-28-5p	0.697584585	16	Very High	BCmicrO|CoMeTa|DIANA|ElMMo3|microrna.org|MirAncesTar|miRDB|MirMAP|miRTar2GO|Mirza-G|MultiMiTar|PACCMIT|RepTar|TargetRank|TargetScan|TargetSpy
LYPD3	O95274		hsa-miR-28-5p	0.696838543	18	Very High	BCmicrO|BiTargeting|CoMeTa|DIANA|ElMMo3|MAMI|microrna.org|MirAncesTar|mirbase|miRDB|MirMAP|miRTar2GO|Mirza-G|MultiMiTar|PITA|RepTar|RNAhybrid|TargetScan
PRCC	Q92733		hsa-miR-28-5p	0.69676666	18	Very High	BCmicrO|CoMeTa|Cupid|DIANA|ElMMo3|microrna.org|MirAncesTar|mirbase|miRDB|MirMAP|miRTar2GO|Mirza-G|PACCMIT|RepTar|RNA22|RNAhybrid|TargetScan|TargetSpy
HNRNPK	P61978		hsa-miR-28-5p	0.695281471	17	Very High	BCmicrO|CoMeTa|Cupid|DIANA|ElMMo3|MBStar|microrna.org|MirAncesTar|miRDB|MirMAP|miRTar2GO|Mirza-G|MultiMiTar|PACCMIT|RepTar|RNAhybrid|TargetScan
E2F6	O75461		hsa-miR-28-5p	0.692057545	19	Very High	BCmicrO|BiTargeting|CoMeTa|Cupid|DIANA|ElMMo3|MBStar|MAMI|microrna.org|MirAncesTar|mirbase|miRDB|MirMAP|Mirza-G|MultiMiTar|PITA|RepTar|RNAhybrid|TargetScan
CASP2	P42575		hsa-miR-28-5p	0.691051133	17	Very High	BCmicrO|CoMeTa|DIANA|ElMMo3|MBStar|microrna.org|MirAncesTar|miRDB|MirMAP|MirTar|miRTar2GO|Mirza-G|MultiMiTar|PITA|RepTar|RNAhybrid|TargetScan
RHO	P08100		hsa-miR-28-5p	0.689771921	17	Very High	BCmicrO|CoMeTa|DIANA|ElMMo3|microrna.org|MirAncesTar|miRDB|MirMAP|MirTar|Mirza-G|MultiMiTar|PACCMIT|RepTar|RNAhybrid|TargetRank|TargetScan|TargetSpy
SEH1L	Q96EE3		hsa-miR-28-5p	0.688745778	18	Very High	BCmicrO|BiTargeting|CoMeTa|Cupid|DIANA|ElMMo3|MBStar|MAMI|microrna.org|MirAncesTar|miRDB|MirMAP|MirSNP|miRTar2GO|Mirza-G|MultiMiTar|RepTar|RNAhybrid
MSL2	Q9HCI7		hsa-miR-28-5p	0.68825882	18	Very High	BCmicrO|BiTargeting|CoMeTa|DIANA|ElMMo3|microrna.org|MirAncesTar|miRDB|MirMAP|miRTar2GO|Mirza-G|MultiMiTar|PACCMIT|RepTar|RNAhybrid|TargetRank|TargetScan|TargetSpy
IQSEC2	Q5JU85		hsa-miR-28-5p	0.685908431	18	Very High	BCmicrO|BiTargeting|CoMeTa|Cupid|DIANA|ElMMo3|MBStar|microrna.org|MirAncesTar|miRDB|MirMAP|Mirza-G|MultiMiTar|PITA|RepTar|RNAhybrid|TargetRank|TargetScan
TEX261	Q6UWH6		hsa-miR-28-5p	0.685798964	18	Very High	BCmicrO|CoMeTa|DIANA|ElMMo3|MBStar|MAMI|microrna.org|MirAncesTar|mirbase|miRDB|MirMAP|miRTar2GO|Mirza-G|MultiMiTar|PITA|RepTar|RNAhybrid|TargetScan
TMEM200B	Q69YZ2		hsa-miR-28-5p	0.682029719	18	Very High	BCmicrO|BiTargeting|Cupid|DIANA|ElMMo3|MBStar|microrna.org|MirAncesTar|miRDB|MirMAP|Mirza-G|MultiMiTar|RepTar|RNA22|RNAhybrid|TargetRank|TargetScan|TargetSpy
PSMF1	Q92530		hsa-miR-28-5p	0.68067201	17	Very High	BCmicrO|BiTargeting|CoMeTa|DIANA|ElMMo3|MBStar|microrna.org|MirAncesTar|miRDB|MirMAP|miRTar2GO|Mirza-G|MultiMiTar|RepTar|RNAhybrid|TargetScan|TargetSpy
OLA1	Q9NTK5		hsa-miR-28-5p	0.678675157	15	Very High	BCmicrO|DIANA|ElMMo3|MBStar|MAMI|microrna.org|MirAncesTar|miRDB|MirMAP|Mirza-G|MultiMiTar|PITA|RepTar|RNAhybrid|TargetSpy
IKZF4	Q9H2S9		hsa-miR-28-5p	0.677709341	18	Very High	BCmicrO|BiTargeting|CoMeTa|Cupid|DIANA|ElMMo3|MBStar|microrna.org|MirAncesTar|miRDB|MirMAP|MirTar|Mirza-G|MultiMiTar|PACCMIT|RepTar|RNAhybrid|TargetRank
ZNF512	Q96ME7		hsa-miR-28-5p	0.670714396	17	Very High	BCmicrO|BiTargeting|Cupid|DIANA|ElMMo3|MBStar|MAMI|microrna.org|MirAncesTar|miRDB|MirMAP|MirSNP|Mirza-G|MultiMiTar|RepTar|RNAhybrid|TargetRank
PAPPA	Q13219		hsa-miR-28-5p	0.669406818	16	Very High	BCmicrO|CoMeTa|Cupid|DIANA|ElMMo3|microrna.org|MirAncesTar|miRDB|MirMAP|MirSNP|miRTar2GO|Mirza-G|MultiMiTar|RepTar|TargetRank|TargetSpy
MAP3K3	Q99759		hsa-miR-28-5p	0.667270811	18	Very High	BCmicrO|BiTargeting|CoMeTa|DIANA|ElMMo3|microrna.org|MirAncesTar|miRDB|MirMAP|miRTar2GO|MultiMiTar|PACCMIT|PITA|RepTar|RNAhybrid|TargetRank|TargetScan|TargetSpy
HS2ST1	Q7LGA3		hsa-miR-28-5p	0.662552169	16	Very High	BCmicrO|CoMeTa|DIANA|ElMMo3|MBStar|microrna.org|MirAncesTar|miRDB|MirMAP|miRTar2GO|Mirza-G|RepTar|RNAhybrid|TargetRank|TargetScan|TargetSpy
MORF4L2	Q15014		hsa-miR-28-5p	0.66046283	19	Very High	BCmicrO|BiTargeting|CoMeTa|Cupid|DIANA|ElMMo3|MBStar|MAMI|microrna.org|MirAncesTar|mirbase|miRDB|MirMAP|MirTar|miRTar2GO|Mirza-G|PACCMIT|RepTar|RNAhybrid
THRB	P10828		hsa-miR-28-5p	0.655605979	18	Very High	BCmicrO|BiTargeting|CoMeTa|DIANA|ElMMo3|MBStar|microrna.org|MirAncesTar|miRDB|MirMAP|MirSNP|MirTar|Mirza-G|MultiMiTar|RepTar|RNAhybrid|TargetRank|TargetSpy
RNF150	Q9ULK6		hsa-miR-28-5p	0.652044422	17	Very High	BCmicrO|BiTargeting|DIANA|ElMMo3|MBStar|microrna.org|MirAncesTar|miRDB|MirMAP|MirTar|miRTar2GO|Mirza-G|RepTar|RNAhybrid|TargetRank|TargetScan|TargetSpy
MEOX2	P50222		hsa-miR-28-5p	0.651361963	18	Very High	BCmicrO|CoMeTa|Cupid|DIANA|ElMMo3|MBStar|microrna.org|MirAncesTar|miRDB|MirMAP|MirTar|Mirza-G|MultiMiTar|PACCMIT|RepTar|RNAhybrid|TargetRank|TargetSpy
CCDC6	Q16204		hsa-miR-28-5p	0.651042345	16	Very High	BCmicrO|CoMeTa|Cupid|DIANA|ElMMo3|MBStar|microrna.org|MirAncesTar|miRDB|MirMAP|miRTar2GO|Mirza-G|MultiMiTar|RepTar|TargetScan|TargetSpy
AHNAK	Q09666		hsa-miR-28-5p	0.650997505	17	Very High	BCmicrO|BiTargeting|CoMeTa|Cupid|DIANA|MBStar|microrna.org|MirAncesTar|mirbase|miRDB|MirMAP|miRTar2GO|Mirza-G|MultiMiTar|RepTar|RNAhybrid|TargetRank
CCDC113	Q9H0I3		hsa-miR-28-5p	0.650258518	19	Very High	BCmicrO|BiTargeting|DIANA|ElMMo3|MBStar|microrna.org|MirAncesTar|miRDB|MirMAP|MirSNP|MirTar|miRTar2GO|Mirza-G|PITA|RepTar|RNAhybrid|TargetRank|TargetScan|TargetSpy
RARG	P13631		hsa-miR-28-5p	0.650116426	18	Very High	BCmicrO|BiTargeting|CoMeTa|Cupid|DIANA|ElMMo3|MBStar|microrna.org|MirAncesTar|miRDB|MirMAP|Mirza-G|MultiMiTar|PITA|RepTar|RNAhybrid|TargetRank|TargetScan
HOXA1	P49639		hsa-miR-28-5p	0.649807492	18	Very High	BCmicrO|BiTargeting|CoMeTa|DIANA|ElMMo3|MBStar|microrna.org|MirAncesTar|miRDB|MirMAP|MirTar|Mirza-G|MultiMiTar|PACCMIT|RepTar|RNAhybrid|TargetRank|TargetSpy
CREB1	P16220		hsa-miR-28-5p	0.649704637	18	Very High	BCmicrO|BiTargeting|CoMeTa|Cupid|DIANA|ElMMo3|MBStar|MirAncesTar|miRDB|MirMAP|MirSNP|miRTar2GO|Mirza-G|MultiMiTar|PITA|RepTar|RNAhybrid|TargetScan
MORF4L1	Q9UBU8		hsa-miR-28-5p	0.649137292	17	Very High	BCmicrO|CoMeTa|Cupid|DIANA|ElMMo3|MBStar|microrna.org|MirAncesTar|miRDB|MirMAP|miRTar2GO|Mirza-G|MultiMiTar|RepTar|RNAhybrid|TargetRank|TargetSpy
USP9X	Q93008		hsa-miR-28-5p	0.649079983	18	Very High	BCmicrO|BiTargeting|CoMeTa|ElMMo3|MBStar|microrna.org|MirAncesTar|miRDB|MirMAP|MirTar|miRTar2GO|Mirza-G|MultiMiTar|PACCMIT|RepTar|RNAhybrid|TargetRank|TargetSpy
DRAM1	Q8N682		hsa-miR-28-5p	0.648597765	18	Very High	BCmicrO|CoMeTa|DIANA|ElMMo3|MBStar|MirAncesTar|mirbase|miRDB|MirMAP|MirSNP|miRTar2GO|Mirza-G|MultiMiTar|PITA|RepTar|RNAhybrid|TargetScan|TargetSpy
MTCP1	P56278		hsa-miR-28-5p	0.648431315	17	Very High	BCmicrO|BiTargeting|CoMeTa|DIANA|ElMMo3|microrna.org|MirAncesTar|miRDB|MirMAP|MirTar|Mirza-G|MultiMiTar|RepTar|RNAhybrid|TargetRank|TargetScan|TargetSpy
ATXN1	P54253		hsa-miR-28-5p	0.646122113	15	Very High	BCmicrO|CoMeTa|DIANA|ElMMo3|MBStar|microrna.org|MirAncesTar|miRDB|MirMAP|miRTar2GO|MultiMiTar|RepTar|TargetRank|TargetScan|TargetSpy
SACM1L	Q9NTJ5		hsa-miR-28-5p	0.640973057	18	Very High	BCmicrO|CoMeTa|DIANA|ElMMo3|MBStar|microrna.org|MirAncesTar|miRDB|MirMAP|MirTar|miRTar2GO|Mirza-G|MultiMiTar|PITA|RepTar|RNAhybrid|TargetRank|TargetSpy
EFNB3	Q15768		hsa-miR-28-5p	0.63979216	16	Very High	BCmicrO|BiTargeting|CoMeTa|DIANA|ElMMo3|microrna.org|MirAncesTar|miRDB|MirMAP|Mirza-G|MultiMiTar|PACCMIT|RepTar|RNAhybrid|TargetRank|TargetScan
SMURF2	Q9HAU4		hsa-miR-28-5p	0.639055847	17	Very High	BCmicrO|BiTargeting|CoMeTa|DIANA|ElMMo3|MBStar|microrna.org|MirAncesTar|miRDB|MirMAP|MirTar|miRTar2GO|Mirza-G|MultiMiTar|RNAhybrid|TargetScan|TargetSpy
OSBPL10	Q9BXB5		hsa-miR-28-5p	0.637649115	16	Very High	BCmicrO|DIANA|ElMMo3|MBStar|microrna.org|MirAncesTar|miRDB|MirMAP|MirTar|miRTar2GO|Mirza-G|RepTar|RNAhybrid|TargetRank|TargetScan|TargetSpy
OTUB1	Q96FW1		hsa-miR-28-5p	0.63727936	17	Very High	BCmicrO|BiTargeting|CoMeTa|ElMMo3|MAMI|MirAncesTar|mirbase|miRDB|MirMAP|MirSNP|miRTar2GO|MultiMiTar|PACCMIT|PITA|RepTar|RNAhybrid|TargetScan
RCVRN	P35243		hsa-miR-28-5p	0.636617152	17	Very High	BCmicrO|BiTargeting|CoMeTa|DIANA|ElMMo3|MAMI|microrna.org|MirAncesTar|mirbase|miRDB|MirMAP|MirSNP|MultiMiTar|PACCMIT|RepTar|RNAhybrid|TargetScan
STK24	Q9Y6E0		hsa-miR-28-5p	0.634319389	17	Very High	BCmicrO|BiTargeting|CoMeTa|DIANA|ElMMo3|MBStar|MAMI|MirAncesTar|miRDB|MirMAP|MirSNP|Mirza-G|MultiMiTar|RepTar|RNAhybrid|TargetRank|TargetScan
C16orf52	Q8NHV5		hsa-miR-28-5p	0.633936311	14	Very High	BiTargeting|Cupid|DIANA|ElMMo3|MBStar|microrna.org|MirAncesTar|miRDB|MirMAP|miRTar2GO|Mirza-G|PACCMIT|RNAhybrid|TargetScan
GAPVD1	Q14C86		hsa-miR-28-5p	0.632519046	16	Very High	BCmicrO|BiTargeting|CoMeTa|Cupid|DIANA|ElMMo3|microrna.org|MirAncesTar|miRDB|MirMAP|miRTar2GO|Mirza-G|MultiMiTar|RepTar|RNAhybrid|TargetScan
CCNL2	Q96S94		hsa-miR-28-5p	0.630420441	15	Very High	BCmicrO|BiTargeting|CoMeTa|ElMMo3|microrna.org|MirAncesTar|miRDB|MirMAP|MirSNP|miRTar2GO|MultiMiTar|RepTar|RNAhybrid|TargetRank|TargetScan
AMIGO1	Q86WK6		hsa-miR-28-5p	0.629308153	15	Very High	BCmicrO|DIANA|ElMMo3|microrna.org|MirAncesTar|miRDB|MirMAP|Mirza-G|MultiMiTar|PACCMIT|RepTar|RNA22|RNAhybrid|TargetRank|TargetScan
IKBKB	O14920		hsa-miR-28-5p	0.629282776	17	Very High	BCmicrO|Cupid|DIANA|ElMMo3|MBStar|microrna.org|MirAncesTar|miRDB|MirMAP|MirSNP|MirTar|miRTar2GO|Mirza-G|RepTar|RNAhybrid|TargetRank|TargetSpy
SLC31A1	O15431		hsa-miR-28-5p	0.628718138	17	Very High	BCmicrO|BiTargeting|CoMeTa|Cupid|DIANA|ElMMo3|microrna.org|MirAncesTar|miRDB|MirMAP|MirSNP|Mirza-G|MultiMiTar|PITA|RepTar|TargetScan|TargetSpy
AGO1	Q9UL18		hsa-miR-28-5p	0.628664773	17	Very High	BCmicrO|BiTargeting|CoMeTa|DIANA|ElMMo3|MBStar|microrna.org|MirAncesTar|MirMAP|MirTar|miRTar2GO|Mirza-G|MultiMiTar|PITA|RepTar|RNA22|TargetRank
MTMR3	Q13615		hsa-miR-28-5p	0.627168131	16	Very High	BCmicrO|BiTargeting|CoMeTa|DIANA|ElMMo3|MBStar|MirAncesTar|miRDB|MirMAP|miRTar2GO|MultiMiTar|PITA|RepTar|RNAhybrid|TargetRank|TargetScan
FOXN3	O00409		hsa-miR-28-5p	0.62687052	17	Very High	BCmicrO|Cupid|DIANA|ElMMo3|MBStar|microrna.org|MirAncesTar|miRDB|MirMAP|Mirza-G|MultiMiTar|PACCMIT|RepTar|RNAhybrid|TargetRank|TargetScan|TargetSpy
SRSF11	Q05519		hsa-miR-28-5p	0.626224866	18	Very High	BCmicrO|BiTargeting|CoMeTa|Cupid|DIANA|ElMMo3|MBStar|microrna.org|MirAncesTar|miRDB|MirMAP|MirTar|miRTar2GO|Mirza-G|RepTar|RNAhybrid|TargetRank|TargetSpy
SEMA4G	Q9NTN9		hsa-miR-28-5p	0.625155577	17	Very High	BCmicrO|BiTargeting|CoMeTa|Cupid|DIANA|ElMMo3|microrna.org|MirAncesTar|mirbase|miRDB|MirMAP|MirSNP|MultiMiTar|PITA|RepTar|RNAhybrid|TargetRank
CSNK1G1	Q9HCP0		hsa-miR-28-5p	0.62305417	17	Very High	BCmicrO|BiTargeting|CoMeTa|DIANA|ElMMo3|MBStar|MirAncesTar|miRDB|MirMAP|miRTar2GO|Mirza-G|MultiMiTar|PACCMIT|PITA|RepTar|RNAhybrid|TargetScan
DYNC1LI2	O43237		hsa-miR-28-5p	0.6216943	15	Very High	BCmicrO|CoMeTa|DIANA|ElMMo3|microrna.org|MirAncesTar|miRDB|MirMAP|MirTar|miRTar2GO|Mirza-G|MultiMiTar|RepTar|RNAhybrid|TargetRank
NANOS1	Q8WY41		hsa-miR-28-5p	0.620335071	15	Very High	BCmicrO|BiTargeting|DIANA|ElMMo3|MBStar|microrna.org|MirAncesTar|miRDB|MirMAP|miRTar2GO|Mirza-G|MultiMiTar|RepTar|TargetScan|TargetSpy
AS3MT	Q9HBK9		hsa-miR-28-5p	0.619476526	15	Very High	BCmicrO|DIANA|ElMMo3|MBStar|microrna.org|MirAncesTar|miRDB|MirMAP|MirTar|Mirza-G|RepTar|RNAhybrid|TargetRank|TargetScan|TargetSpy
ZFHX3	Q15911		hsa-miR-28-5p	0.61663267	17	Very High	BCmicrO|BiTargeting|CoMeTa|Cupid|DIANA|ElMMo3|MBStar|microrna.org|MirAncesTar|miRDB|MirMAP|MirSNP|miRTar2GO|Mirza-G|MultiMiTar|RepTar|TargetScan
TAGAP	Q8N103		hsa-miR-28-5p	0.616577055	14	Very High	BCmicrO|Cupid|DIANA|ElMMo3|MBStar|microrna.org|MirAncesTar|miRDB|MirMAP|Mirza-G|MultiMiTar|RNAhybrid|TargetScan|TargetSpy
PIANP	Q8IYJ0		hsa-miR-28-5p	0.61652266	14	Very High	BCmicrO|BiTargeting|DIANA|ElMMo3|MAMI|MirAncesTar|miRDB|MirMAP|Mirza-G|MultiMiTar|RepTar|RNAhybrid|TargetRank|TargetScan
SKA1	Q96BD8		hsa-miR-28-5p	0.616408142	18	Very High	BCmicrO|BiTargeting|DIANA|ElMMo3|MBStar|microrna.org|MirAncesTar|mirbase|miRDB|MirMAP|MirTar|miRTar2GO|Mirza-G|PITA|RepTar|RNAhybrid|TargetRank|TargetSpy
N4BP1	O75113		hsa-miR-28-5p	0.615088768	14	Very High	BCmicrO|CoMeTa|DIANA|ElMMo3|MBStar|MirAncesTar|mirbase|miRDB|MirMAP|Mirza-G|MultiMiTar|PITA|RepTar|TargetScan
ATAD2B	Q9ULI0		hsa-miR-28-5p	0.614235514	16	Very High	BCmicrO|CoMeTa|Cupid|DIANA|ElMMo3|MBStar|microrna.org|MirAncesTar|miRDB|MirMAP|MirTar|Mirza-G|PACCMIT|PITA|RepTar|TargetRank
AMPH	P49418		hsa-miR-28-5p	0.613660076	17	Very High	BCmicrO|CoMeTa|Cupid|DIANA|ElMMo3|MBStar|microrna.org|MirAncesTar|miRDB|MirMAP|MirSNP|Mirza-G|MultiMiTar|PACCMIT|RepTar|RNAhybrid|TargetSpy
FAIM2	Q9BWQ8		hsa-miR-28-5p	0.612895618	14	Very High	BCmicrO|BiTargeting|DIANA|ElMMo3|MAMI|MirAncesTar|miRDB|MirMAP|MirTar|MultiMiTar|RepTar|RNAhybrid|TargetRank|TargetSpy
SMARCC2	Q8TAQ2		hsa-miR-28-5p	0.612552564	17	Very High	BCmicrO|BiTargeting|CoMeTa|Cupid|DIANA|ElMMo3|microrna.org|MirAncesTar|miRDB|MirMAP|miRTar2GO|Mirza-G|MultiMiTar|PACCMIT|PITA|RNAhybrid|TargetScan
URGCP	Q8TCY9		hsa-miR-28-5p	0.610126623	16	Very High	BCmicrO|BiTargeting|CoMeTa|DIANA|ElMMo3|MAMI|microrna.org|MirAncesTar|miRDB|MirMAP|Mirza-G|PITA|RepTar|RNAhybrid|TargetScan|TargetSpy
TRPC4AP	Q8TEL6		hsa-miR-28-5p	0.60942264	18	Very High	BCmicrO|BiTargeting|DIANA|ElMMo3|MAMI|microrna.org|MirAncesTar|mirbase|miRDB|MirMAP|miRTar2GO|Mirza-G|MultiMiTar|PITA|RepTar|RNAhybrid|TargetRank|TargetSpy
SIRT1	Q96EB6		hsa-miR-28-5p	0.608845621	10	Very High	BCmicrO|BiTargeting|CoMeTa|Cupid|MBStar|MAMI|MirAncesTar|MultiMiTar|RepTar|RNAhybrid
TRPS1	Q9UHF7		hsa-miR-28-5p	0.606792527	16	Very High	BCmicrO|CoMeTa|Cupid|DIANA|ElMMo3|MBStar|microrna.org|MirAncesTar|miRDB|MirMAP|MultiMiTar|PACCMIT|RepTar|RNAhybrid|TargetRank|TargetSpy
SRSF1	Q07955		hsa-miR-28-5p	0.606346291	13	Very High	BCmicrO|CoMeTa|DIANA|MBStar|MirAncesTar|MirMAP|miRTar2GO|Mirza-G|MultiMiTar|PITA|RepTar|RNAhybrid|TargetScan
KAT6A	Q92794		hsa-miR-28-5p	0.606337916	16	Very High	BCmicrO|CoMeTa|Cupid|DIANA|ElMMo3|MBStar|microrna.org|MirAncesTar|miRDB|MirMAP|MirTar|Mirza-G|MultiMiTar|PACCMIT|RepTar|RNAhybrid
SLC37A4	O43826		hsa-miR-28-5p	0.604995491	13	Very High	BCmicrO|BiTargeting|ElMMo3|microrna.org|MirAncesTar|mirbase|miRDB|MirTar|Mirza-G|RepTar|RNAhybrid|TargetRank|TargetScan
AFF4	Q9UHB7		hsa-miR-28-5p	0.603521575	17	Very High	BCmicrO|BiTargeting|CoMeTa|DIANA|ElMMo3|MBStar|microrna.org|MirAncesTar|miRDB|MirMAP|MirTar|miRTar2GO|MultiMiTar|RepTar|RNAhybrid|TargetRank|TargetSpy
BCAM	P50895		hsa-miR-28-5p	0.603069937	16	Very High	BCmicrO|CoMeTa|DIANA|ElMMo3|microrna.org|MirAncesTar|miRDB|MirMAP|MirTar|miRTar2GO|Mirza-G|PITA|RepTar|RNAhybrid|TargetScan|TargetSpy
LRRC14	Q15048		hsa-miR-28-5p	0.602855338	16	Very High	BCmicrO|CoMeTa|DIANA|ElMMo3|MBStar|MirAncesTar|miRDB|MirMAP|miRTar2GO|MultiMiTar|PACCMIT|PITA|RepTar|RNAhybrid|TargetRank|TargetScan
RAB8B	Q92930		hsa-miR-28-5p	0.602493204	16	Very High	BCmicrO|BiTargeting|CoMeTa|Cupid|DIANA|ElMMo3|microrna.org|MirAncesTar|miRDB|MirMAP|miRTar2GO|Mirza-G|MultiMiTar|PACCMIT|RepTar|RNAhybrid
VEZF1	Q14119		hsa-miR-28-5p	0.60047996	15	Very High	BCmicrO|CoMeTa|Cupid|DIANA|ElMMo3|MBStar|microrna.org|MirAncesTar|miRDB|MirMAP|miRTar2GO|MultiMiTar|RepTar|RNAhybrid|TargetRank
CDCA7L	Q96GN5		hsa-miR-28-5p	0.600380473	17	Very High	BCmicrO|BiTargeting|DIANA|ElMMo3|MBStar|microrna.org|MirAncesTar|miRDB|MirMAP|MirTar|miRTar2GO|Mirza-G|MultiMiTar|RepTar|RNAhybrid|TargetScan|TargetSpy
FMNL3	Q8IVF7		hsa-miR-28-5p	0.599854731	17	Very High	BCmicrO|BiTargeting|DIANA|ElMMo3|MBStar|MirAncesTar|miRDB|MirMAP|MirTar|miRTar2GO|Mirza-G|MultiMiTar|PITA|RepTar|RNAhybrid|TargetScan|TargetSpy
DCAF10	Q5QP82		hsa-miR-28-5p	0.599314013	16	Very High	BCmicrO|BiTargeting|CoMeTa|DIANA|ElMMo3|MirAncesTar|miRDB|MirMAP|miRTar2GO|Mirza-G|MultiMiTar|PITA|RepTar|RNAhybrid|TargetScan|TargetSpy
OSBPL3	Q9H4L5		hsa-miR-28-5p	0.598984077	16	Very High	BCmicrO|BiTargeting|DIANA|ElMMo3|MBStar|microrna.org|MirAncesTar|miRDB|MirMAP|MirTar|miRTar2GO|Mirza-G|MultiMiTar|RepTar|RNAhybrid|TargetRank
NAV1	Q8NEY1		hsa-miR-28-5p	0.598618065	17	Very High	BCmicrO|BiTargeting|CoMeTa|Cupid|DIANA|ElMMo3|MBStar|microrna.org|MirAncesTar|miRDB|MirMAP|MirTar|miRTar2GO|RepTar|RNA22|TargetRank|TargetSpy
MAT2A	P31153		hsa-miR-28-5p	0.598132655	14	Very High	BCmicrO|CoMeTa|Cupid|DIANA|ElMMo3|microrna.org|MirAncesTar|miRDB|MirMAP|miRTar2GO|Mirza-G|MultiMiTar|RepTar|RNAhybrid
YWHAH	Q04917		hsa-miR-28-5p	0.598011019	17	Very High	BCmicrO|CoMeTa|DIANA|ElMMo3|MBStar|microrna.org|MirAncesTar|miRDB|MirMAP|MirSNP|miRTar2GO|Mirza-G|MultiMiTar|RepTar|RNAhybrid|TargetRank|TargetSpy
MAP1B	P46821		hsa-miR-28-5p	0.596295454	17	Very High	BCmicrO|CoMeTa|DIANA|ElMMo3|MBStar|microrna.org|MirAncesTar|miRDB|MirMAP|miRTar2GO|Mirza-G|MultiMiTar|PITA|RepTar|RNAhybrid|TargetRank|TargetSpy
KPNB1	Q14974		hsa-miR-28-5p	0.595680373	16	Very High	BCmicrO|CoMeTa|Cupid|DIANA|ElMMo3|microrna.org|MirAncesTar|miRDB|MirMAP|MirSNP|miRTar2GO|Mirza-G|MultiMiTar|RepTar|RNAhybrid|TargetRank
TLK1	Q9UKI8		hsa-miR-28-5p	0.594988107	17	Very High	BCmicrO|BiTargeting|CoMeTa|Cupid|DIANA|ElMMo3|MBStar|microrna.org|MirAncesTar|miRDB|MirMAP|miRTar2GO|Mirza-G|MultiMiTar|RepTar|RNAhybrid|TargetSpy
PAK2	Q13177		hsa-miR-28-5p	0.594594119	18	Very High	BCmicrO|BiTargeting|CoMeTa|DIANA|ElMMo3|MBStar|microrna.org|MirAncesTar|miRDB|MirMAP|MirTar|miRTar2GO|Mirza-G|MultiMiTar|PITA|RepTar|RNAhybrid|TargetSpy
PRDM2	Q13029		hsa-miR-28-5p	0.594541138	16	Very High	BCmicrO|BiTargeting|CoMeTa|ElMMo3|MBStar|microrna.org|MirAncesTar|miRDB|MirMAP|miRTar2GO|Mirza-G|MultiMiTar|RepTar|RNA22|RNAhybrid|TargetSpy
BAG1	Q99933		hsa-miR-28-5p	0.593516835	17	Very High	BCmicrO|CoMeTa|DIANA|ElMMo3|MBStar|microrna.org|MirAncesTar|miRDB|MirMAP|MirSNP|MirTar|Mirza-G|PITA|RepTar|RNAhybrid|TargetRank|TargetSpy
ASPA	P45381		hsa-miR-28-5p	0.593262014	16	Very High	BCmicrO|CoMeTa|DIANA|ElMMo3|MAMI|microrna.org|MirAncesTar|mirbase|miRDB|MirMAP|MirTar|Mirza-G|PITA|RepTar|RNAhybrid|TargetRank
GRIA4	P48058		hsa-miR-28-5p	0.593189224	18	Very High	BCmicrO|BiTargeting|CoMeTa|Cupid|DIANA|ElMMo3|MBStar|microrna.org|MirAncesTar|miRDB|MirMAP|Mirza-G|MultiMiTar|PACCMIT|PITA|RepTar|RNAhybrid|TargetSpy
ARIH1	Q9Y4X5		hsa-miR-28-5p	0.592739683	16	Very High	BCmicrO|BiTargeting|Cupid|DIANA|ElMMo3|MBStar|microrna.org|MirAncesTar|mirbase|miRDB|MirMAP|miRTar2GO|Mirza-G|RNAhybrid|TargetScan|TargetSpy
SIK2	Q9H0K1		hsa-miR-28-5p	0.592129971	16	Very High	BCmicrO|Cupid|DIANA|ElMMo3|MBStar|microrna.org|MirAncesTar|miRDB|MirMAP|MirSNP|MirTar|miRTar2GO|Mirza-G|MultiMiTar|RepTar|TargetRank
VAT1L	Q9HCJ6		hsa-miR-28-5p	0.591830483	14	Very High	BCmicrO|DIANA|ElMMo3|MBStar|microrna.org|MirAncesTar|miRDB|MirMAP|MirSNP|PITA|RepTar|TargetRank|TargetScan|TargetSpy
PPP6C	O00743		hsa-miR-28-5p	0.591603799	15	Very High	BCmicrO|BiTargeting|Cupid|DIANA|ElMMo3|MBStar|microrna.org|MirAncesTar|miRDB|MirMAP|MirTar|miRTar2GO|Mirza-G|TargetScan|TargetSpy
QKI	Q96PU8		hsa-miR-28-5p	0.590549022	17	Very High	BCmicrO|CoMeTa|Cupid|DIANA|ElMMo3|MBStar|microrna.org|MirAncesTar|miRDB|MirMAP|miRTar2GO|Mirza-G|MultiMiTar|PITA|RepTar|RNAhybrid|TargetSpy
ARHGEF39	Q8N4T4		hsa-miR-28-5p	0.589925521	16	Very High	BCmicrO|BiTargeting|DIANA|ElMMo3|MBStar|microrna.org|MirAncesTar|miRDB|MirMAP|MirSNP|Mirza-G|MultiMiTar|PITA|RepTar|TargetRank|TargetScan
LUZP1	Q86V48		hsa-miR-28-5p	0.588363425	18	Very High	BCmicrO|BiTargeting|CoMeTa|DIANA|ElMMo3|MBStar|MirAncesTar|miRDB|MirMAP|miRTar2GO|PACCMIT|PITA|RepTar|RNA22|RNAhybrid|TargetRank|TargetScan|TargetSpy
IGF2BP1	Q9NZI8		hsa-miR-28-5p	0.588311114	14	Very High	BCmicrO|DIANA|ElMMo3|MBStar|MirAncesTar|miRDB|MirMAP|MirSNP|miRTar2GO|MultiMiTar|RepTar|TargetRank|TargetScan|TargetSpy
RBM23	Q86U06		hsa-miR-28-5p	0.587906014	15	Very High	BCmicrO|BiTargeting|CoMeTa|Cupid|DIANA|ElMMo3|microrna.org|MirAncesTar|miRDB|MirMAP|miRTar2GO|Mirza-G|RepTar|RNAhybrid|TargetScan
NT5C3A	Q9H0P0		hsa-miR-28-5p	0.584737531	16	Very High	BCmicrO|BiTargeting|DIANA|ElMMo3|MAMI|microrna.org|MirAncesTar|mirbase|miRDB|MirMAP|MirTar|Mirza-G|PITA|RepTar|RNAhybrid|TargetSpy
MDGA1	Q8NFP4		hsa-miR-28-5p	0.583948551	17	Very High	BCmicrO|BiTargeting|DIANA|ElMMo3|MirAncesTar|mirbase|miRDB|MirMAP|MirSNP|Mirza-G|MultiMiTar|PITA|RepTar|RNAhybrid|TargetRank|TargetScan|TargetSpy
NUAK1	O60285		hsa-miR-28-5p	0.582281527	16	Very High	BCmicrO|CoMeTa|DIANA|ElMMo3|MBStar|microrna.org|MirAncesTar|miRDB|MirMAP|MirSNP|Mirza-G|MultiMiTar|PITA|RepTar|TargetRank|TargetSpy
DKK3	Q9UBP4		hsa-miR-28-5p	0.581971557	15	Very High	BCmicrO|CoMeTa|DIANA|ElMMo3|microrna.org|MirAncesTar|miRDB|MirMAP|miRTar2GO|Mirza-G|PACCMIT|RepTar|RNAhybrid|TargetScan|TargetSpy
OPHN1	O60890		hsa-miR-28-5p	0.581949632	14	Very High	BCmicrO|BiTargeting|CoMeTa|DIANA|ElMMo3|MirAncesTar|miRDB|MirMAP|miRTar2GO|Mirza-G|MultiMiTar|RepTar|TargetScan|TargetSpy
CCND3	P30281		hsa-miR-28-5p	0.580881779	18	Very High	BCmicrO|BiTargeting|Cupid|DIANA|ElMMo3|MBStar|MAMI|MirAncesTar|mirbase|miRDB|MirMAP|miRTar2GO|MultiMiTar|PACCMIT|PITA|RepTar|RNAhybrid|TargetRank
S1PR1	P21453		hsa-miR-28-5p	0.580709447	15	Very High	BCmicrO|CoMeTa|Cupid|DIANA|ElMMo3|MBStar|microrna.org|MirAncesTar|miRDB|MirMAP|MultiMiTar|RepTar|RNA22|TargetRank|TargetSpy
CDC73	Q6P1J9		hsa-miR-28-5p	0.580590502	17	Very High	BCmicrO|CoMeTa|DIANA|ElMMo3|MBStar|microrna.org|MirAncesTar|mirbase|miRDB|MirMAP|MirTar|miRTar2GO|Mirza-G|RepTar|RNA22|TargetRank|TargetSpy
PPP1R3A	Q16821		hsa-miR-28-5p	0.580478638	12	Very High	BCmicrO|DIANA|ElMMo3|MBStar|MAMI|microrna.org|MirAncesTar|MirMAP|MultiMiTar|RepTar|RNAhybrid|TargetSpy
CPD	O75976		hsa-miR-28-5p	0.578082546	16	Very High	BCmicrO|CoMeTa|Cupid|DIANA|ElMMo3|MBStar|microrna.org|MirAncesTar|miRDB|MirMAP|miRTar2GO|Mirza-G|MultiMiTar|PITA|RepTar|RNAhybrid
RBMXL2	O75526		hsa-miR-28-5p	0.575213078	15	Very High	BCmicrO|CoMeTa|Cupid|DIANA|ElMMo3|MBStar|microrna.org|MirAncesTar|miRDB|MirMAP|Mirza-G|MultiMiTar|RepTar|TargetRank|TargetSpy
JPH1	Q9HDC5		hsa-miR-28-5p	0.574498851	16	Very High	BCmicrO|BiTargeting|DIANA|ElMMo3|MBStar|microrna.org|MirAncesTar|miRDB|MirMAP|miRTar2GO|Mirza-G|MultiMiTar|PACCMIT|RepTar|RNAhybrid|TargetRank
EYA3	Q99504		hsa-miR-28-5p	0.574463207	16	Very High	BCmicrO|BiTargeting|CoMeTa|Cupid|DIANA|ElMMo3|microrna.org|MirAncesTar|miRDB|MirMAP|MirTar|MultiMiTar|RepTar|RNA22|RNAhybrid|TargetScan
SMG7	Q92540		hsa-miR-28-5p	0.57436875	15	Very High	BCmicrO|CoMeTa|DIANA|ElMMo3|microrna.org|MirAncesTar|miRDB|MirMAP|miRTar2GO|Mirza-G|MultiMiTar|RepTar|RNA22|RNAhybrid|TargetRank
RUFY3	Q7L099		hsa-miR-28-5p	0.573247283	15	Very High	BCmicrO|DIANA|ElMMo3|MBStar|microrna.org|MirAncesTar|miRDB|MirMAP|MirSNP|miRTar2GO|Mirza-G|MultiMiTar|RepTar|RNAhybrid|TargetRank
DNM3	Q9UQ16		hsa-miR-28-5p	0.572341962	19	Very High	BCmicrO|BiTargeting|DIANA|ElMMo3|MBStar|microrna.org|MirAncesTar|mirbase|miRDB|MirMAP|MirTar|miRTar2GO|Mirza-G|MultiMiTar|PITA|RepTar|RNA22|RNAhybrid|TargetRank
BEGAIN	Q9BUH8		hsa-miR-28-5p	0.571798831	13	Very High	BCmicrO|DIANA|ElMMo3|microrna.org|MirAncesTar|miRDB|MirMAP|MirTar|Mirza-G|MultiMiTar|RepTar|RNAhybrid|TargetScan
CHL1	O00533		hsa-miR-28-5p	0.571537303	17	Very High	BCmicrO|BiTargeting|CoMeTa|DIANA|ElMMo3|MBStar|microrna.org|MirAncesTar|miRDB|MirMAP|MirSNP|Mirza-G|MultiMiTar|PITA|RepTar|RNAhybrid|TargetScan
CBL	P22681		hsa-miR-28-5p	0.571262709	16	Very High	BCmicrO|BiTargeting|CoMeTa|DIANA|ElMMo3|MBStar|MirAncesTar|miRDB|MirMAP|miRTar2GO|Mirza-G|PITA|RepTar|RNAhybrid|TargetRank|TargetScan
ATRNL1	Q5VV63		hsa-miR-28-5p	0.570844375	18	Very High	BCmicrO|BiTargeting|CoMeTa|DIANA|ElMMo3|MBStar|microrna.org|MirAncesTar|miRDB|MirMAP|MirSNP|MirTar|Mirza-G|PITA|RepTar|RNAhybrid|TargetRank|TargetSpy
PTBP3	O95758		hsa-miR-28-5p	0.57077982	15	Very High	BCmicrO|CoMeTa|DIANA|ElMMo3|microrna.org|MirAncesTar|miRDB|MirMAP|miRTar2GO|Mirza-G|MultiMiTar|RepTar|RNAhybrid|TargetRank|TargetSpy
YIPF3	Q9GZM5		hsa-miR-28-5p	0.570718818	15	Very High	BCmicrO|BiTargeting|CoMeTa|DIANA|ElMMo3|microrna.org|MirAncesTar|mirbase|miRDB|MirMAP|Mirza-G|MultiMiTar|RepTar|RNAhybrid|TargetScan
PSAP	P07602		hsa-miR-28-5p	0.569378446	17	Very High	BCmicrO|BiTargeting|CoMeTa|DIANA|ElMMo3|microrna.org|MirAncesTar|mirbase|miRDB|MirMAP|MirSNP|miRTar2GO|Mirza-G|PITA|RepTar|RNAhybrid|TargetScan
RAPGEFL1	Q9UHV5		hsa-miR-28-5p	0.569194554	12	Very High	BCmicrO|CoMeTa|DIANA|ElMMo3|microrna.org|MirAncesTar|MirMAP|miRTar2GO|MultiMiTar|RepTar|RNAhybrid|TargetRank
CD47	Q08722		hsa-miR-28-5p	0.569179181	17	Very High	BCmicrO|BiTargeting|CoMeTa|DIANA|ElMMo3|MBStar|microrna.org|MirAncesTar|miRDB|MirMAP|MirTar|miRTar2GO|Mirza-G|RepTar|RNAhybrid|TargetRank|TargetSpy
SCARB2	Q14108		hsa-miR-28-5p	0.567270311	15	Very High	BCmicrO|CoMeTa|DIANA|ElMMo3|MBStar|microrna.org|MirAncesTar|miRDB|MirMAP|MirTar|miRTar2GO|Mirza-G|RepTar|RNAhybrid|TargetRank
GDA	Q9Y2T3		hsa-miR-28-5p	0.567196668	17	Very High	BCmicrO|BiTargeting|DIANA|ElMMo3|MBStar|microrna.org|MirAncesTar|mirbase|miRDB|MirMAP|MirSNP|miRTar2GO|MultiMiTar|PACCMIT|PITA|RepTar|RNAhybrid
TEF	Q10587		hsa-miR-28-5p	0.567028058	11	Very High	BCmicrO|DIANA|ElMMo3|microrna.org|MirAncesTar|miRDB|MirMAP|MultiMiTar|RepTar|TargetRank|TargetScan
CNEP1R1	Q8N9A8		hsa-miR-28-5p	0.566268815	15	Very High	BCmicrO|Cupid|DIANA|ElMMo3|MBStar|microrna.org|MirAncesTar|miRDB|MirMAP|MirTar|Mirza-G|MultiMiTar|RepTar|RNAhybrid|TargetRank
RDX	P35241		hsa-miR-28-5p	0.565840449	15	Very High	BCmicrO|BiTargeting|CoMeTa|Cupid|ElMMo3|microrna.org|MirAncesTar|miRDB|MirMAP|miRTar2GO|Mirza-G|MultiMiTar|RepTar|RNAhybrid|TargetSpy
LBH	Q53QV2		hsa-miR-28-5p	0.565102709	16	Very High	BCmicrO|BiTargeting|CoMeTa|DIANA|ElMMo3|MBStar|microrna.org|MirAncesTar|miRDB|MirMAP|Mirza-G|MultiMiTar|PACCMIT|RepTar|RNAhybrid|TargetRank
BTRC	Q9Y297		hsa-miR-28-5p	0.56458178	16	Very High	BCmicrO|CoMeTa|DIANA|ElMMo3|microrna.org|MirAncesTar|miRDB|MirMAP|MirSNP|MirTar|miRTar2GO|Mirza-G|PITA|RepTar|TargetRank|TargetSpy
GSK3A	P49840		hsa-miR-28-5p	0.564508477	16	Very High	BCmicrO|BiTargeting|CoMeTa|DIANA|ElMMo3|MBStar|MAMI|microrna.org|MirAncesTar|mirbase|miRDB|MirMAP|MultiMiTar|PACCMIT|RepTar|RNAhybrid
PKNOX2	Q96KN3		hsa-miR-28-5p	0.563924913	15	Very High	BCmicrO|CoMeTa|DIANA|ElMMo3|microrna.org|MirAncesTar|mirbase|miRDB|MirMAP|MirTar|Mirza-G|PACCMIT|RepTar|RNAhybrid|TargetRank
GLG1	Q92896		hsa-miR-28-5p	0.563651595	14	Very High	BCmicrO|CoMeTa|ElMMo3|MBStar|microrna.org|MirAncesTar|mirbase|miRDB|MirMAP|miRTar2GO|PITA|RepTar|RNAhybrid|TargetScan
PTGER3	P43115		hsa-miR-28-5p	0.557768342	19	Very High	BCmicrO|BiTargeting|CoMeTa|DIANA|ElMMo3|MBStar|microrna.org|MirAncesTar|miRDB|MirMAP|MirSNP|MirTar|Mirza-G|PITA|RepTar|RNA22|RNAhybrid|TargetRank|TargetSpy
SNX27	Q96L92		hsa-miR-28-5p	0.557275883	16	Very High	BCmicrO|BiTargeting|CoMeTa|DIANA|ElMMo3|MBStar|MirAncesTar|miRDB|MirMAP|miRTar2GO|MultiMiTar|PITA|RepTar|RNA22|TargetRank|TargetSpy
NRG1	Q02297		hsa-miR-28-5p	0.556240908	16	Very High	BCmicrO|CoMeTa|Cupid|DIANA|ElMMo3|MBStar|microrna.org|MirAncesTar|mirbase|miRDB|MirMAP|miRTar2GO|Mirza-G|MultiMiTar|RepTar|RNAhybrid
CAMK2D	Q13557		hsa-miR-28-5p	0.556220611	17	Very High	BCmicrO|BiTargeting|CoMeTa|ElMMo3|MBStar|microrna.org|MirAncesTar|mirbase|miRDB|MirMAP|miRTar2GO|Mirza-G|MultiMiTar|PITA|RepTar|RNAhybrid|TargetSpy
EPHB1	P54762		hsa-miR-28-5p	0.555998531	16	Very High	BCmicrO|CoMeTa|Cupid|DIANA|ElMMo3|microrna.org|MirAncesTar|miRDB|MirMAP|Mirza-G|MultiMiTar|PACCMIT|PITA|RepTar|RNAhybrid|TargetSpy
FGF23	Q9GZV9		hsa-miR-28-5p	0.555556983	15	Very High	BCmicrO|BiTargeting|DIANA|ElMMo3|MBStar|microrna.org|MirAncesTar|miRDB|MirMAP|MirTar|Mirza-G|MultiMiTar|PITA|RepTar|TargetRank
9-Mar	Q86YJ5		hsa-miR-28-5p	0.555282907	15	Very High	BCmicrO|BiTargeting|DIANA|ElMMo3|MBStar|microrna.org|MirAncesTar|miRDB|MirMAP|Mirza-G|MultiMiTar|PITA|RepTar|RNAhybrid|TargetScan
PROSER1	Q86XN7		hsa-miR-28-5p	0.554606572	17	Very High	BCmicrO|BiTargeting|CoMeTa|DIANA|ElMMo3|microrna.org|MirAncesTar|miRDB|MirMAP|MirSNP|miRTar2GO|Mirza-G|MultiMiTar|RepTar|RNAhybrid|TargetRank|TargetSpy
SSH2	Q76I76		hsa-miR-28-5p	0.554434442	15	Very High	BCmicrO|DIANA|ElMMo3|MBStar|MirAncesTar|miRDB|MirMAP|miRTar2GO|Mirza-G|MultiMiTar|PACCMIT|RepTar|RNAhybrid|TargetRank|TargetSpy
STK4	Q13043		hsa-miR-28-5p	0.553952231	16	Very High	BCmicrO|BiTargeting|CoMeTa|DIANA|ElMMo3|MBStar|microrna.org|MirAncesTar|miRDB|MirMAP|miRTar2GO|Mirza-G|RepTar|RNAhybrid|TargetScan|TargetSpy
ALG9	Q9H6U8		hsa-miR-28-5p	0.553920058	17	Very High	BCmicrO|BiTargeting|CoMeTa|DIANA|ElMMo3|MBStar|microrna.org|MirAncesTar|miRDB|MirMAP|Mirza-G|PITA|RepTar|RNAhybrid|TargetRank|TargetScan|TargetSpy
ATPAF1	Q5TC12		hsa-miR-28-5p	0.552247845	15	Very High	BCmicrO|BiTargeting|ElMMo3|microrna.org|MirAncesTar|mirbase|MirMAP|Mirza-G|MultiMiTar|PACCMIT|PITA|RepTar|RNA22|RNAhybrid|TargetScan
TMEM127	O75204		hsa-miR-28-5p	0.549003545	15	Very High	BCmicrO|BiTargeting|CoMeTa|DIANA|ElMMo3|MBStar|MirAncesTar|miRDB|MirMAP|MirSNP|MirTar|Mirza-G|MultiMiTar|PACCMIT|RepTar
ZC3H11A	O75152		hsa-miR-28-5p	0.548790673	12	Very High	BCmicrO|CoMeTa|Cupid|DIANA|MirAncesTar|MirMAP|miRTar2GO|MultiMiTar|RepTar|RNA22|RNAhybrid|TargetScan
CCDC71L	Q8N9Z2		hsa-miR-28-5p	0.54864036	15	Very High	BCmicrO|BiTargeting|Cupid|DIANA|ElMMo3|MBStar|microrna.org|MirAncesTar|miRDB|MirMAP|MirSNP|Mirza-G|RepTar|RNAhybrid|TargetRank
CIT	O14578		hsa-miR-28-5p	0.548439134	16	Very High	BCmicrO|CoMeTa|DIANA|ElMMo3|MBStar|microrna.org|MirAncesTar|miRDB|MirMAP|MirSNP|miRTar2GO|Mirza-G|RepTar|RNAhybrid|TargetRank|TargetSpy
TRIT1	Q9H3H1		hsa-miR-28-5p	0.546980678	17	Very High	BCmicrO|CoMeTa|DIANA|ElMMo3|MAMI|microrna.org|MirAncesTar|mirbase|miRDB|MirMAP|miRTar2GO|Mirza-G|PACCMIT|RepTar|RNA22|RNAhybrid|TargetSpy
ATP6V1A	P38606		hsa-miR-28-5p	0.544684791	12	Very High	BCmicrO|CoMeTa|Cupid|DIANA|ElMMo3|microrna.org|MirAncesTar|miRDB|MirMAP|MirTar|RepTar|TargetRank
KLHL18	O94889		hsa-miR-28-5p	0.543678569	14	Very High	BCmicrO|BiTargeting|CoMeTa|DIANA|ElMMo3|microrna.org|MirAncesTar|miRDB|MirMAP|miRTar2GO|Mirza-G|RepTar|TargetRank|TargetScan
CAPRIN1	Q14444		hsa-miR-28-5p	0.54364016	14	Very High	BCmicrO|CoMeTa|ElMMo3|MBStar|microrna.org|MirAncesTar|miRDB|miRTar2GO|Mirza-G|MultiMiTar|RepTar|RNAhybrid|TargetRank|TargetSpy
NTM	Q9P121		hsa-miR-28-5p	0.543310854	17	Very High	BCmicrO|BiTargeting|CoMeTa|Cupid|DIANA|ElMMo3|MBStar|microrna.org|MirAncesTar|miRDB|MirMAP|Mirza-G|MultiMiTar|PACCMIT|RepTar|RNAhybrid|TargetSpy
PLPPR5	Q32ZL2		hsa-miR-28-5p	0.543181099	13	Very High	BCmicrO|BiTargeting|DIANA|ElMMo3|MBStar|microrna.org|MirAncesTar|miRDB|MirMAP|Mirza-G|PITA|RepTar|TargetScan
SARM1	Q6SZW1		hsa-miR-28-5p	0.543005942	16	Very High	BCmicrO|BiTargeting|DIANA|ElMMo3|MirAncesTar|miRDB|MirMAP|MirTar|miRTar2GO|Mirza-G|PACCMIT|PITA|RepTar|RNAhybrid|TargetRank|TargetSpy
C18orf25	Q96B23		hsa-miR-28-5p	0.542343607	15	Very High	BCmicrO|CoMeTa|DIANA|ElMMo3|MBStar|microrna.org|MirAncesTar|miRDB|MirMAP|MirSNP|miRTar2GO|Mirza-G|MultiMiTar|RepTar|TargetRank
TERF2IP	Q9NYB0		hsa-miR-28-5p	0.541518047	15	Very High	BCmicrO|CoMeTa|DIANA|ElMMo3|MBStar|microrna.org|MirAncesTar|miRDB|MirMAP|miRTar2GO|Mirza-G|MultiMiTar|RepTar|RNAhybrid|TargetRank
GPR88	Q9GZN0		hsa-miR-28-5p	0.540892931	13	Very High	BCmicrO|CoMeTa|Cupid|DIANA|ElMMo3|microrna.org|MirAncesTar|MirMAP|MultiMiTar|RNA22|RNAhybrid|TargetScan|TargetSpy
LNPK	Q9C0E8		hsa-miR-28-5p	0.539435296	17	Very High	BCmicrO|BiTargeting|DIANA|ElMMo3|MBStar|MAMI|microrna.org|MirAncesTar|miRDB|MirMAP|MirSNP|MirTar|Mirza-G|MultiMiTar|RepTar|RNAhybrid|TargetSpy
TTC39A	Q5SRH9		hsa-miR-28-5p	0.539083926	13	Very High	BCmicrO|BiTargeting|CoMeTa|Cupid|ElMMo3|microrna.org|MirAncesTar|miRDB|MirMAP|RepTar|RNA22|RNAhybrid|TargetScan
SH3GLB1	Q9Y371		hsa-miR-28-5p	0.535769706	14	Very High	BCmicrO|BiTargeting|CoMeTa|ElMMo3|MBStar|microrna.org|MirAncesTar|miRDB|miRTar2GO|Mirza-G|MultiMiTar|RepTar|RNAhybrid|TargetRank
MECP2	P51608		hsa-miR-28-5p	0.53450143	14	Very High	BCmicrO|BiTargeting|CoMeTa|DIANA|ElMMo3|MBStar|MirAncesTar|miRDB|MirMAP|miRTar2GO|MultiMiTar|RepTar|RNAhybrid|TargetRank
FOXO1	Q12778		hsa-miR-28-5p	0.534027498	15	Very High	BCmicrO|CoMeTa|DIANA|ElMMo3|MBStar|microrna.org|MirAncesTar|miRDB|MirMAP|MirTar|miRTar2GO|Mirza-G|RepTar|TargetRank|TargetSpy
ACHE	P22303		hsa-miR-28-5p	0.533198985	14	Very High	BCmicrO|BiTargeting|CoMeTa|DIANA|ElMMo3|microrna.org|MirAncesTar|miRDB|MirMAP|MultiMiTar|PACCMIT|RepTar|RNAhybrid|TargetScan
TRIM23	P36406		hsa-miR-28-5p	0.533176861	14	Very High	BCmicrO|DIANA|ElMMo3|MBStar|microrna.org|MirAncesTar|miRDB|MirMAP|MirTar|miRTar2GO|Mirza-G|RepTar|RNAhybrid|TargetRank
ABHD2	P08910		hsa-miR-28-5p	0.532307811	14	Very High	BCmicrO|BiTargeting|CoMeTa|DIANA|ElMMo3|MirAncesTar|miRDB|MirMAP|miRTar2GO|MultiMiTar|RepTar|RNAhybrid|TargetRank|TargetSpy
NFAT5	O94916		hsa-miR-28-5p	0.531772846	15	Very High	BCmicrO|BiTargeting|CoMeTa|DIANA|ElMMo3|MBStar|MirAncesTar|miRDB|MirMAP|MirSNP|miRTar2GO|MultiMiTar|RepTar|RNAhybrid|TargetSpy
SF3A1	Q15459		hsa-miR-28-5p	0.53162223	14	Very High	BCmicrO|BiTargeting|CoMeTa|DIANA|ElMMo3|microrna.org|MirAncesTar|miRDB|MirMAP|miRTar2GO|MultiMiTar|RepTar|RNAhybrid|TargetScan
MAD2L1	Q13257		hsa-miR-28-5p	0.531225859	16	Very High	BCmicrO|BiTargeting|CoMeTa|DIANA|ElMMo3|microrna.org|MirAncesTar|mirbase|miRDB|MirMAP|MirTar|miRTar2GO|Mirza-G|RepTar|RNAhybrid|TargetSpy
BIVM	Q86UB2		hsa-miR-28-5p	0.531214855	16	Very High	BCmicrO|BiTargeting|DIANA|ElMMo3|MAMI|microrna.org|MirAncesTar|mirbase|miRDB|MirMAP|miRTar2GO|Mirza-G|MultiMiTar|RepTar|RNAhybrid|TargetSpy
KDM5C	P41229		hsa-miR-28-5p	0.531201632	15	Very High	BCmicrO|CoMeTa|DIANA|ElMMo3|MBStar|MirAncesTar|miRDB|MirMAP|miRTar2GO|Mirza-G|MultiMiTar|RepTar|RNAhybrid|TargetScan|TargetSpy
MAPK6	Q16659		hsa-miR-28-5p	0.530745205	10	Very High	BCmicrO|Cupid|DIANA|microrna.org|MirAncesTar|MirMAP|miRTar2GO|Mirza-G|MultiMiTar|TargetScan
MRPS35	P82673		hsa-miR-28-5p	0.530709445	12	Very High	BCmicrO|DIANA|ElMMo3|microrna.org|MirAncesTar|miRDB|MirMAP|MirTar|miRTar2GO|Mirza-G|RNAhybrid|TargetScan
SWT1	Q5T5J6		hsa-miR-28-5p	0.530458023	17	Very High	BCmicrO|BiTargeting|Cupid|DIANA|ElMMo3|microrna.org|MirAncesTar|miRDB|MirMAP|MirTar|Mirza-G|PITA|RepTar|RNA22|RNAhybrid|TargetRank|TargetSpy
CKAP5	Q14008		hsa-miR-28-5p	0.530173062	14	Very High	BCmicrO|BiTargeting|CoMeTa|DIANA|MAMI|microrna.org|MirAncesTar|mirbase|MirMAP|miRTar2GO|MultiMiTar|PITA|RepTar|RNAhybrid
PDZD4	Q76G19		hsa-miR-28-5p	0.528993028	15	Very High	BCmicrO|BiTargeting|DIANA|ElMMo3|MBStar|MAMI|MirAncesTar|mirbase|miRDB|MirMAP|MultiMiTar|PACCMIT|RepTar|RNAhybrid|TargetScan
RNF138	Q8WVD3		hsa-miR-28-5p	0.527976968	13	Very High	BCmicrO|CoMeTa|DIANA|ElMMo3|microrna.org|MirAncesTar|miRDB|MirMAP|miRTar2GO|Mirza-G|MultiMiTar|RepTar|TargetSpy
NUDT11	Q96G61		hsa-miR-28-5p	0.527731057	16	Very High	BCmicrO|BiTargeting|CoMeTa|DIANA|ElMMo3|microrna.org|MirAncesTar|mirbase|miRDB|MirMAP|Mirza-G|PITA|RepTar|RNAhybrid|TargetRank|TargetSpy
MAX	P61244		hsa-miR-28-5p	0.527307892	15	Very High	BCmicrO|CoMeTa|DIANA|ElMMo3|MBStar|microrna.org|MirAncesTar|miRDB|MirMAP|miRTar2GO|Mirza-G|MultiMiTar|PACCMIT|RepTar|RNAhybrid
ITGA10	O75578		hsa-miR-28-5p	0.526455642	16	Very High	BCmicrO|CoMeTa|DIANA|ElMMo3|MBStar|microrna.org|MirAncesTar|miRDB|MirMAP|MirTar|Mirza-G|RepTar|RNA22|RNAhybrid|TargetRank|TargetSpy
KMT2A	Q03164		hsa-miR-28-5p	0.526364759	15	Very High	BCmicrO|BiTargeting|CoMeTa|Cupid|DIANA|ElMMo3|MBStar|microrna.org|MirAncesTar|miRDB|MirMAP|miRTar2GO|PACCMIT|RepTar|RNAhybrid
NTRK2	Q16620		hsa-miR-28-5p	0.524678672	13	Very High	BCmicrO|BiTargeting|CoMeTa|DIANA|ElMMo3|MBStar|MirAncesTar|miRDB|MirMAP|MirTar|MultiMiTar|RepTar|TargetRank
DCLK1	O15075		hsa-miR-28-5p	0.523344359	15	Very High	BCmicrO|CoMeTa|Cupid|DIANA|ElMMo3|MBStar|MirAncesTar|miRDB|MirMAP|MirSNP|Mirza-G|MultiMiTar|PACCMIT|RepTar|RNAhybrid
SMAD4	Q13485		hsa-miR-28-5p	0.522838127	14	Very High	BCmicrO|BiTargeting|CoMeTa|DIANA|ElMMo3|MBStar|microrna.org|MirAncesTar|MirMAP|miRTar2GO|Mirza-G|MultiMiTar|RNAhybrid|TargetSpy
SIRT3	Q9NTG7		hsa-miR-28-5p	0.521723301	15	Very High	BCmicrO|BiTargeting|DIANA|ElMMo3|MAMI|microrna.org|MirAncesTar|miRDB|MirMAP|MirSNP|MirTar|Mirza-G|RepTar|RNAhybrid|TargetRank
GPR26	Q8NDV2		hsa-miR-28-5p	0.521233799	14	Very High	BCmicrO|DIANA|ElMMo3|MBStar|MAMI|MirAncesTar|miRDB|MirMAP|MirSNP|MirTar|Mirza-G|PITA|RepTar|TargetSpy
CDC14A	Q9UNH5		hsa-miR-28-5p	0.520396044	14	Very High	BCmicrO|CoMeTa|Cupid|ElMMo3|microrna.org|MirAncesTar|mirbase|MirMAP|MirSNP|MultiMiTar|PITA|RepTar|RNA22|RNAhybrid
LURAP1L	Q8IV03		hsa-miR-28-5p	0.520123625	10	Very High	BCmicrO|DIANA|microrna.org|MirAncesTar|MirMAP|miRTar2GO|Mirza-G|MultiMiTar|PITA|TargetScan
SNAP25	P60880		hsa-miR-28-5p	0.519730689	13	Very High	BCmicrO|CoMeTa|Cupid|DIANA|ElMMo3|microrna.org|MirAncesTar|miRDB|MirMAP|MultiMiTar|PACCMIT|RepTar|RNAhybrid
EFNA5	P52803		hsa-miR-28-5p	0.519469078	16	Very High	BCmicrO|BiTargeting|CoMeTa|Cupid|DIANA|ElMMo3|MBStar|MirAncesTar|mirbase|miRDB|MirMAP|miRTar2GO|Mirza-G|MultiMiTar|RepTar|RNAhybrid
WSB2	Q9NYS7		hsa-miR-28-5p	0.519441273	13	Very High	BCmicrO|BiTargeting|DIANA|ElMMo3|microrna.org|MirAncesTar|miRDB|MirMAP|MirSNP|MirTar|Mirza-G|RNAhybrid|TargetScan
SYN2	Q92777		hsa-miR-28-5p	0.518329866	13	Very High	BCmicrO|CoMeTa|Cupid|ElMMo3|microrna.org|MirAncesTar|miRDB|Mirza-G|MultiMiTar|PITA|RepTar|RNAhybrid|TargetSpy
PAFAH2	Q99487		hsa-miR-28-5p	0.518288305	17	Very High	BCmicrO|BiTargeting|CoMeTa|DIANA|ElMMo3|MBStar|microrna.org|MirAncesTar|miRDB|MirMAP|MirTar|miRTar2GO|Mirza-G|RepTar|RNA22|RNAhybrid|TargetRank
LDLRAD4	O15165		hsa-miR-28-5p	0.517572041	15	Very High	BCmicrO|BiTargeting|CoMeTa|DIANA|ElMMo3|MBStar|MirAncesTar|miRDB|MirMAP|miRTar2GO|Mirza-G|MultiMiTar|RepTar|RNAhybrid|TargetRank
ZFYVE26	Q68DK2		hsa-miR-28-5p	0.516696998	13	Very High	BCmicrO|BiTargeting|CoMeTa|DIANA|ElMMo3|MBStar|microrna.org|MirAncesTar|miRDB|MirMAP|miRTar2GO|RNAhybrid|TargetScan
SLC44A5	Q8NCS7		hsa-miR-28-5p	0.516564836	13	Very High	BCmicrO|BiTargeting|ElMMo3|MBStar|microrna.org|MirAncesTar|MirMAP|MirTar|Mirza-G|PITA|RNA22|RNAhybrid|TargetScan
DNAJB14	Q8TBM8		hsa-miR-28-5p	0.516430804	14	Very High	BCmicrO|CoMeTa|DIANA|ElMMo3|MBStar|microrna.org|MirAncesTar|miRDB|MirMAP|MirTar|Mirza-G|MultiMiTar|RepTar|RNAhybrid
PITX2	Q99697		hsa-miR-28-5p	0.515937131	16	Very High	BCmicrO|BiTargeting|CoMeTa|Cupid|DIANA|ElMMo3|MBStar|microrna.org|MirAncesTar|mirbase|miRDB|MirMAP|miRTar2GO|Mirza-G|RepTar|RNAhybrid
STX16	O14662		hsa-miR-28-5p	0.515043836	17	Very High	BCmicrO|BiTargeting|DIANA|ElMMo3|MBStar|microrna.org|MirAncesTar|miRDB|MirMAP|MirTar|miRTar2GO|Mirza-G|PITA|RepTar|RNAhybrid|TargetRank|TargetSpy
PTEN	P60484		hsa-miR-28-5p	0.515013778	14	Very High	BCmicrO|CoMeTa|DIANA|ElMMo3|MBStar|microrna.org|MirAncesTar|MirMAP|miRTar2GO|Mirza-G|MultiMiTar|RepTar|RNAhybrid|TargetRank
HIF1AN	Q9NWT6		hsa-miR-28-5p	0.514815669	15	Very High	BCmicrO|CoMeTa|DIANA|ElMMo3|MBStar|MirAncesTar|miRDB|MirMAP|miRTar2GO|MultiMiTar|PITA|RepTar|RNAhybrid|TargetRank|TargetSpy
TRIM26	Q12899		hsa-miR-28-5p	0.514443652	15	Very High	BCmicrO|BiTargeting|DIANA|ElMMo3|MBStar|microrna.org|MirAncesTar|miRDB|MirMAP|miRTar2GO|Mirza-G|RepTar|RNAhybrid|TargetScan|TargetSpy
PDK4	Q16654		hsa-miR-28-5p	0.514098661	14	Very High	BCmicrO|BiTargeting|DIANA|ElMMo3|microrna.org|MirAncesTar|miRDB|MirMAP|MirTar|miRTar2GO|Mirza-G|RepTar|TargetRank|TargetSpy
AGPAT3	Q9NRZ7		hsa-miR-28-5p	0.514058757	15	Very High	BCmicrO|BiTargeting|DIANA|ElMMo3|MBStar|MirAncesTar|mirbase|miRDB|MirMAP|MirTar|miRTar2GO|Mirza-G|RepTar|RNAhybrid|TargetRank
DIXDC1	Q155Q3		hsa-miR-28-5p	0.514017476	16	Very High	BCmicrO|BiTargeting|CoMeTa|DIANA|ElMMo3|MBStar|microrna.org|MirAncesTar|miRDB|MirMAP|miRTar2GO|Mirza-G|MultiMiTar|RepTar|RNAhybrid|TargetSpy
SEMA4F	O95754		hsa-miR-28-5p	0.513893256	16	Very High	BCmicrO|BiTargeting|CoMeTa|Cupid|DIANA|ElMMo3|MBStar|microrna.org|MirAncesTar|miRDB|MirMAP|MirTar|Mirza-G|RepTar|RNAhybrid|TargetSpy
OTOF	Q9HC10		hsa-miR-28-5p	0.512583531	14	Very High	BCmicrO|BiTargeting|DIANA|ElMMo3|MBStar|microrna.org|MirAncesTar|miRDB|MirMAP|Mirza-G|MultiMiTar|RepTar|RNAhybrid|TargetScan
GIT2	Q14161		hsa-miR-28-5p	0.512513343	14	Very High	BCmicrO|DIANA|ElMMo3|MBStar|microrna.org|MirAncesTar|miRDB|MirMAP|MirTar|miRTar2GO|Mirza-G|RepTar|RNAhybrid|TargetRank
SEMA4C	Q9C0C4		hsa-miR-28-5p	0.512393889	14	Very High	BCmicrO|Cupid|DIANA|ElMMo3|MBStar|microrna.org|MirAncesTar|miRDB|MirMAP|miRTar2GO|MultiMiTar|RepTar|RNAhybrid|TargetRank
MCM9	Q9NXL9		hsa-miR-28-5p	0.512357507	12	Very High	BCmicrO|BiTargeting|ElMMo3|microrna.org|MirAncesTar|MirMAP|MirSNP|Mirza-G|RepTar|RNAhybrid|TargetRank|TargetScan
VAMP2	P63027		hsa-miR-28-5p	0.511872198	14	Very High	BCmicrO|CoMeTa|DIANA|ElMMo3|MBStar|MirAncesTar|miRDB|MirMAP|Mirza-G|MultiMiTar|PITA|RepTar|RNAhybrid|TargetScan
MRM2	Q9UI43		hsa-miR-28-5p	0.511656917	15	Very High	BCmicrO|BiTargeting|Cupid|DIANA|ElMMo3|MAMI|microrna.org|MirAncesTar|mirbase|miRDB|MirMAP|MirTar|Mirza-G|RepTar|RNAhybrid
ASB8	Q9H765		hsa-miR-28-5p	0.51144548	14	Very High	BCmicrO|BiTargeting|CoMeTa|DIANA|ElMMo3|MBStar|MAMI|microrna.org|MirAncesTar|miRDB|MirMAP|Mirza-G|RepTar|RNAhybrid
C12orf29	Q8N999		hsa-miR-28-5p	0.511413203	16	Very High	BCmicrO|DIANA|ElMMo3|MBStar|microrna.org|MirAncesTar|miRDB|MirMAP|MirSNP|MirTar|Mirza-G|MultiMiTar|RepTar|RNAhybrid|TargetRank|TargetSpy
NLGN2	Q8NFZ4		hsa-miR-28-5p	0.509803706	12	Very High	BCmicrO|DIANA|ElMMo3|microrna.org|MirAncesTar|miRDB|MirMAP|MultiMiTar|RepTar|RNAhybrid|TargetRank|TargetScan
USP9Y	O00507		hsa-miR-28-5p	0.509565956	15	Very High	BCmicrO|CoMeTa|DIANA|ElMMo3|MBStar|microrna.org|MirAncesTar|miRDB|MirMAP|MirTar|Mirza-G|MultiMiTar|RNAhybrid|TargetRank|TargetSpy
JMJD1C	Q15652		hsa-miR-28-5p	0.508980444	13	Very High	BCmicrO|CoMeTa|Cupid|DIANA|ElMMo3|microrna.org|MirAncesTar|MirMAP|Mirza-G|MultiMiTar|RepTar|RNAhybrid|TargetSpy
PFKM	P08237		hsa-miR-28-5p	0.508650093	13	Very High	BCmicrO|BiTargeting|CoMeTa|DIANA|ElMMo3|microrna.org|MirAncesTar|mirbase|miRDB|MirMAP|RepTar|RNAhybrid|TargetScan
RGL1	Q9NZL6		hsa-miR-28-5p	0.508566407	15	Very High	BCmicrO|BiTargeting|CoMeTa|DIANA|ElMMo3|MBStar|microrna.org|MirAncesTar|miRDB|MirMAP|miRTar2GO|Mirza-G|RepTar|RNA22|TargetRank
SLC6A1	P30531		hsa-miR-28-5p	0.508526669	14	Very High	BCmicrO|CoMeTa|DIANA|ElMMo3|MBStar|microrna.org|MirAncesTar|miRDB|MirMAP|Mirza-G|MultiMiTar|PITA|RepTar|TargetRank
DNAJA4	Q8WW22		hsa-miR-28-5p	0.508422866	14	Very High	BCmicrO|CoMeTa|DIANA|ElMMo3|MBStar|microrna.org|MirAncesTar|miRDB|MirMAP|Mirza-G|RepTar|RNAhybrid|TargetScan|TargetSpy
FAM135B	Q49AJ0		hsa-miR-28-5p	0.507650878	15	Very High	BCmicrO|BiTargeting|ElMMo3|MBStar|microrna.org|MirAncesTar|mirbase|miRDB|MirMAP|MirSNP|MultiMiTar|RepTar|RNAhybrid|TargetRank|TargetSpy
HOXB9	P17482		hsa-miR-28-5p	0.507255952	15	Very High	BCmicrO|DIANA|ElMMo3|microrna.org|MirAncesTar|mirbase|miRDB|MirMAP|miRTar2GO|Mirza-G|PACCMIT|PITA|RepTar|RNAhybrid|TargetRank
PLAG1	Q6DJT9		hsa-miR-28-5p	0.507225263	14	Very High	BCmicrO|BiTargeting|CoMeTa|Cupid|DIANA|ElMMo3|MBStar|MirAncesTar|MirMAP|Mirza-G|MultiMiTar|RepTar|RNAhybrid|TargetRank
HTRA2	O43464		hsa-miR-28-5p	0.506936746	13	Very High	BCmicrO|CoMeTa|ElMMo3|microrna.org|MirAncesTar|mirbase|miRDB|MirMAP|MultiMiTar|PACCMIT|RepTar|RNAhybrid|TargetScan
IMPDH1	P20839		hsa-miR-28-5p	0.506243713	16	Very High	BCmicrO|BiTargeting|CoMeTa|DIANA|ElMMo3|MBStar|microrna.org|MirAncesTar|mirbase|miRDB|MirMAP|Mirza-G|MultiMiTar|PACCMIT|RepTar|RNAhybrid
SENP1	Q9P0U3		hsa-miR-28-5p	0.506190796	14	Very High	BCmicrO|Cupid|DIANA|ElMMo3|MBStar|microrna.org|MirAncesTar|miRDB|MirMAP|miRTar2GO|Mirza-G|MultiMiTar|PACCMIT|RepTar
GOSR1	O95249		hsa-miR-28-5p	0.505567398	15	Very High	BCmicrO|BiTargeting|CoMeTa|DIANA|ElMMo3|MBStar|microrna.org|MirAncesTar|miRDB|MirMAP|miRTar2GO|MultiMiTar|RepTar|RNAhybrid|TargetSpy
CD34	P28906		hsa-miR-28-5p	0.505488751	15	Very High	BCmicrO|BiTargeting|CoMeTa|DIANA|ElMMo3|microrna.org|MirAncesTar|miRDB|MirMAP|MirTar|Mirza-G|RepTar|RNA22|RNAhybrid|TargetRank
UBE2N	P61088		hsa-miR-28-5p	0.504583662	13	Very High	BCmicrO|DIANA|ElMMo3|microrna.org|MirAncesTar|MirMAP|miRTar2GO|Mirza-G|MultiMiTar|RepTar|RNAhybrid|TargetRank|TargetScan
PCDHA9	Q9Y5H5		hsa-miR-28-5p	0.504466263	16	Very High	BCmicrO|BiTargeting|DIANA|ElMMo3|MBStar|microrna.org|MirAncesTar|miRDB|MirMAP|MirSNP|Mirza-G|MultiMiTar|PITA|RepTar|TargetRank|TargetSpy
ERP44	Q9BS26		hsa-miR-28-5p	0.504353957	14	Very High	BCmicrO|CoMeTa|DIANA|ElMMo3|microrna.org|MirAncesTar|miRDB|MirMAP|Mirza-G|MultiMiTar|PITA|RepTar|TargetRank|TargetSpy
SLC13A3	Q8WWT9		hsa-miR-28-5p	0.504050804	16	Very High	BCmicrO|BiTargeting|CoMeTa|DIANA|ElMMo3|MBStar|microrna.org|MirAncesTar|miRDB|MirMAP|MirSNP|MirTar|Mirza-G|RepTar|RNAhybrid|TargetSpy
FRA10AC1	Q70Z53		hsa-miR-28-5p	0.504028838	15	Very High	BCmicrO|DIANA|ElMMo3|MBStar|microrna.org|MirAncesTar|miRDB|MirMAP|Mirza-G|MultiMiTar|PITA|RepTar|RNAhybrid|TargetRank|TargetSpy
STK35	Q8TDR2		hsa-miR-28-5p	0.503899733	15	Very High	BCmicrO|BiTargeting|DIANA|ElMMo3|MBStar|microrna.org|MirAncesTar|miRDB|MirMAP|MirSNP|miRTar2GO|Mirza-G|MultiMiTar|PITA|RepTar
SRSF6	Q13247		hsa-miR-28-5p	0.503662007	14	Very High	BCmicrO|CoMeTa|DIANA|ElMMo3|microrna.org|MirAncesTar|miRDB|MirMAP|MirTar|Mirza-G|RepTar|RNAhybrid|TargetRank|TargetSpy
NF1	P21359		hsa-miR-28-5p	0.503606643	13	Very High	BCmicrO|BiTargeting|CoMeTa|DIANA|MBStar|microrna.org|MirAncesTar|MirMAP|miRTar2GO|MultiMiTar|PITA|RepTar|RNAhybrid
BRD4	O60885		hsa-miR-28-5p	0.503079108	10	Very High	BCmicrO|DIANA|ElMMo3|MAMI|MirAncesTar|miRDB|MirMAP|MultiMiTar|RepTar|RNAhybrid
SPARC	P09486		hsa-miR-28-5p	0.502933424	12	Very High	BCmicrO|DIANA|ElMMo3|MBStar|microrna.org|MirAncesTar|miRDB|MirMAP|MirSNP|MirTar|RepTar|TargetRank
GREM2	Q9H772		hsa-miR-28-5p	0.502812464	14	Very High	BCmicrO|BiTargeting|CoMeTa|DIANA|ElMMo3|microrna.org|MirAncesTar|miRDB|MirMAP|miRTar2GO|Mirza-G|MultiMiTar|RepTar|TargetRank
CDKN2B	P42772		hsa-miR-28-5p	0.502323415	15	Very High	BCmicrO|Cupid|DIANA|ElMMo3|MBStar|microrna.org|MirAncesTar|miRDB|MirMAP|miRTar2GO|Mirza-G|RepTar|RNAhybrid|TargetRank|TargetSpy
ARHGAP44	Q17R89		hsa-miR-28-5p	0.502027878	15	Very High	BCmicrO|BiTargeting|DIANA|ElMMo3|microrna.org|MirAncesTar|MirMAP|MirSNP|MirTar|Mirza-G|PACCMIT|PITA|RepTar|RNAhybrid|TargetRank
RETREG3	Q86VR2		hsa-miR-28-5p	0.501743462	16	Very High	BCmicrO|BiTargeting|DIANA|ElMMo3|MBStar|microrna.org|MirAncesTar|miRDB|MirMAP|MirSNP|miRTar2GO|Mirza-G|MultiMiTar|RepTar|RNAhybrid|TargetSpy
CREB5	Q02930		hsa-miR-28-5p	0.501347429	15	Very High	BCmicrO|CoMeTa|DIANA|ElMMo3|MBStar|MirAncesTar|miRDB|MirMAP|miRTar2GO|Mirza-G|MultiMiTar|RepTar|RNAhybrid|TargetRank|TargetSpy
GALNT6	Q8NCL4		hsa-miR-28-5p	0.501183353	15	Very High	BCmicrO|BiTargeting|CoMeTa|DIANA|ElMMo3|microrna.org|MirAncesTar|miRDB|MirMAP|MirTar|Mirza-G|RepTar|RNAhybrid|TargetRank|TargetSpy
FAM107A	O95990		hsa-miR-28-5p	0.500086613	15	Very High	BCmicrO|DIANA|ElMMo3|MBStar|microrna.org|MirAncesTar|mirbase|miRDB|MirMAP|MirTar|Mirza-G|PITA|RepTar|RNAhybrid|TargetRank
RNF38	Q9H0F5		hsa-miR-28-5p	0.500036774	15	Very High	BCmicrO|BiTargeting|CoMeTa|ElMMo3|MBStar|microrna.org|MirAncesTar|miRDB|MirMAP|miRTar2GO|Mirza-G|RepTar|RNAhybrid|TargetRank|TargetSpy
CENPF	P49454		hsa-miR-28-5p	0.499598097	15	Very High	BCmicrO|CoMeTa|DIANA|ElMMo3|microrna.org|MirAncesTar|miRDB|MirMAP|MirTar|miRTar2GO|Mirza-G|RepTar|RNA22|RNAhybrid|TargetSpy
YPEL2	Q96QA6		hsa-miR-28-5p	0.49776126	13	Very High	BCmicrO|DIANA|ElMMo3|MBStar|MirAncesTar|miRDB|MirMAP|MirSNP|miRTar2GO|MultiMiTar|RepTar|RNAhybrid|TargetRank
NT5E	P21589		hsa-miR-28-5p	0.497481088	15	Very High	BCmicrO|DIANA|ElMMo3|MBStar|microrna.org|MirAncesTar|miRDB|MirMAP|MirSNP|miRTar2GO|Mirza-G|RepTar|RNAhybrid|TargetRank|TargetSpy
PSG2	P11465		hsa-miR-28-5p	0.496862541	14	Very High	BCmicrO|CoMeTa|DIANA|ElMMo3|microrna.org|MirAncesTar|miRDB|MirMAP|MirSNP|MirTar|Mirza-G|RepTar|RNAhybrid|TargetRank
SH3TC2	Q8TF17		hsa-miR-28-5p	0.496824328	14	Very High	BCmicrO|BiTargeting|CoMeTa|DIANA|ElMMo3|MBStar|MirAncesTar|miRDB|MirMAP|MirTar|PITA|RepTar|RNAhybrid|TargetSpy
METTL8	Q9H825		hsa-miR-28-5p	0.4966431	15	Very High	BCmicrO|BiTargeting|CoMeTa|DIANA|ElMMo3|MBStar|MAMI|MirAncesTar|mirbase|miRDB|MirMAP|Mirza-G|MultiMiTar|RepTar|RNAhybrid
FOXK2	Q01167		hsa-miR-28-5p	0.496330979	14	Very High	BCmicrO|BiTargeting|DIANA|ElMMo3|MirAncesTar|miRDB|MirMAP|miRTar2GO|Mirza-G|MultiMiTar|PACCMIT|RepTar|RNAhybrid|TargetRank
HADHB	P55084		hsa-miR-28-5p	0.494502641	14	Very High	BCmicrO|CoMeTa|DIANA|ElMMo3|microrna.org|MirAncesTar|miRDB|MirMAP|MirSNP|Mirza-G|MultiMiTar|RepTar|RNAhybrid|TargetSpy
NPY2R	P49146		hsa-miR-28-5p	0.494389032	14	Very High	BCmicrO|DIANA|ElMMo3|microrna.org|MirAncesTar|miRDB|MirMAP|MirSNP|MirTar|Mirza-G|RepTar|RNAhybrid|TargetRank|TargetSpy
FRAS1	Q86XX4		hsa-miR-28-5p	0.494155446	16	Very High	BCmicrO|BiTargeting|DIANA|ElMMo3|MBStar|microrna.org|MirAncesTar|miRDB|MirMAP|MirSNP|miRTar2GO|Mirza-G|RepTar|RNAhybrid|TargetRank|TargetSpy
CHSY3	Q70JA7		hsa-miR-28-5p	0.493957739	15	Very High	BCmicrO|Cupid|DIANA|ElMMo3|MBStar|microrna.org|MirAncesTar|miRDB|MirMAP|Mirza-G|MultiMiTar|PITA|RepTar|RNAhybrid|TargetSpy
RSL24D1	Q9UHA3		hsa-miR-28-5p	0.493348589	15	Very High	BCmicrO|CoMeTa|DIANA|ElMMo3|MBStar|microrna.org|MirAncesTar|miRDB|MirMAP|MirTar|Mirza-G|RepTar|RNAhybrid|TargetRank|TargetSpy
ASB5	Q8WWX0		hsa-miR-28-5p	0.493132219	13	Very High	BCmicrO|DIANA|ElMMo3|microrna.org|MirAncesTar|miRDB|MirMAP|MirTar|Mirza-G|RepTar|RNAhybrid|TargetRank|TargetSpy
TMEM47	Q9BQJ4		hsa-miR-28-5p	0.492739251	5	Very High	BCmicrO|MAMI|MirAncesTar|miRTar2GO|MultiMiTar
CTNNBIP1	Q9NSA3		hsa-miR-28-5p	0.492730433	16	Very High	BCmicrO|BiTargeting|CoMeTa|DIANA|ElMMo3|MBStar|microrna.org|MirAncesTar|mirbase|miRDB|MirMAP|miRTar2GO|RepTar|RNA22|RNAhybrid|TargetRank
AP5M1	Q9H0R1		hsa-miR-28-5p	0.491020561	14	Very High	BCmicrO|DIANA|ElMMo3|MBStar|microrna.org|MirAncesTar|miRDB|MirMAP|MirTar|Mirza-G|RepTar|RNAhybrid|TargetRank|TargetSpy
RFX5	P48382		hsa-miR-28-5p	0.490774671	16	Very High	BCmicrO|CoMeTa|ElMMo3|MBStar|microrna.org|MirAncesTar|miRDB|MirMAP|MirSNP|Mirza-G|MultiMiTar|PACCMIT|PITA|RepTar|RNA22|RNAhybrid
CDC42SE1	Q9NRR8		hsa-miR-28-5p	0.490694141	13	Very High	BCmicrO|BiTargeting|CoMeTa|DIANA|ElMMo3|MBStar|MirAncesTar|miRDB|MirMAP|miRTar2GO|RepTar|RNA22|TargetScan
NELL1	Q92832		hsa-miR-28-5p	0.490661347	14	Very High	BCmicrO|BiTargeting|CoMeTa|DIANA|ElMMo3|microrna.org|MirAncesTar|mirbase|miRDB|MirMAP|Mirza-G|MultiMiTar|RepTar|RNAhybrid
FAM126A	Q9BYI3		hsa-miR-28-5p	0.490587047	15	Very High	BCmicrO|DIANA|ElMMo3|MBStar|microrna.org|MirAncesTar|miRDB|MirMAP|MirSNP|MirTar|Mirza-G|RepTar|RNAhybrid|TargetRank|TargetSpy
RIMS3	Q9UJD0		hsa-miR-28-5p	0.490137878	15	Very High	BCmicrO|BiTargeting|CoMeTa|DIANA|ElMMo3|MBStar|microrna.org|MirAncesTar|miRDB|MirMAP|miRTar2GO|RepTar|RNA22|RNAhybrid|TargetScan
MASP1	P48740		hsa-miR-28-5p	0.490033119	13	Very High	BCmicrO|BiTargeting|CoMeTa|DIANA|ElMMo3|microrna.org|MirAncesTar|miRDB|MirMAP|RepTar|RNAhybrid|TargetRank|TargetSpy
PHF6	Q8IWS0		hsa-miR-28-5p	0.489421711	14	Very High	BCmicrO|BiTargeting|Cupid|ElMMo3|microrna.org|MirAncesTar|miRDB|MirMAP|miRTar2GO|Mirza-G|MultiMiTar|PITA|RepTar|RNAhybrid
ATP11A	P98196		hsa-miR-28-5p	0.488405593	16	Very High	BCmicrO|BiTargeting|DIANA|ElMMo3|MBStar|MirAncesTar|miRDB|MirMAP|MirSNP|miRTar2GO|PACCMIT|PITA|RepTar|RNAhybrid|TargetRank|TargetSpy
PTPN21	Q16825		hsa-miR-28-5p	0.487951332	16	Very High	BCmicrO|BiTargeting|DIANA|ElMMo3|MBStar|microrna.org|MirAncesTar|miRDB|MirMAP|MirTar|Mirza-G|PITA|RepTar|RNAhybrid|TargetRank|TargetSpy
ATRN	O75882		hsa-miR-28-5p	0.487759381	13	Very High	BCmicrO|CoMeTa|DIANA|ElMMo3|microrna.org|MirAncesTar|miRDB|MirMAP|miRTar2GO|Mirza-G|MultiMiTar|PITA|RNAhybrid
LIFR	P42702		hsa-miR-28-5p	0.487639748	14	Very High	BCmicrO|BiTargeting|CoMeTa|DIANA|ElMMo3|MBStar|MirAncesTar|miRDB|MirMAP|miRTar2GO|MultiMiTar|PITA|RepTar|RNAhybrid
UBN1	Q9NPG3		hsa-miR-28-5p	0.487080377	13	Very High	BCmicrO|BiTargeting|DIANA|ElMMo3|microrna.org|MirAncesTar|miRDB|MirMAP|miRTar2GO|MultiMiTar|RepTar|RNAhybrid|TargetRank
JAGN1	Q8N5M9		hsa-miR-28-5p	0.486616926	15	Very High	BCmicrO|DIANA|ElMMo3|microrna.org|MirAncesTar|mirbase|miRDB|MirMAP|MirTar|Mirza-G|PITA|RepTar|RNAhybrid|TargetRank|TargetSpy
PHLPP2	Q6ZVD8		hsa-miR-28-5p	0.486500935	14	Very High	BCmicrO|BiTargeting|CoMeTa|DIANA|ElMMo3|microrna.org|MirAncesTar|miRDB|MirMAP|miRTar2GO|Mirza-G|PACCMIT|PITA|RNAhybrid
NPAP1	Q9NZP6		hsa-miR-28-5p	0.485781648	14	Very High	BCmicrO|BiTargeting|CoMeTa|DIANA|ElMMo3|MBStar|microrna.org|MirAncesTar|miRDB|MirMAP|MirSNP|Mirza-G|MultiMiTar|RepTar
AAK1	Q2M2I8		hsa-miR-28-5p	0.485567136	13	Very High	BCmicrO|BiTargeting|CoMeTa|ElMMo3|MBStar|MirAncesTar|miRDB|MirTar|PITA|RepTar|RNAhybrid|TargetScan|TargetSpy
SCN4A	P35499		hsa-miR-28-5p	0.485557412	14	Very High	BCmicrO|BiTargeting|DIANA|ElMMo3|microrna.org|MirAncesTar|miRDB|MirMAP|MirTar|Mirza-G|MultiMiTar|PITA|RepTar|TargetRank
OTUD4	Q01804		hsa-miR-28-5p	0.485034829	14	Very High	BCmicrO|CoMeTa|DIANA|ElMMo3|microrna.org|MirAncesTar|miRDB|MirMAP|miRTar2GO|Mirza-G|MultiMiTar|RepTar|RNAhybrid|TargetSpy
BACE1	P56817		hsa-miR-28-5p	0.483631945	13	Very High	BCmicrO|CoMeTa|DIANA|ElMMo3|MBStar|MirAncesTar|miRDB|MirMAP|Mirza-G|MultiMiTar|RepTar|RNAhybrid|TargetRank
RGS16	O15492		hsa-miR-28-5p	0.483529761	16	Very High	BCmicrO|BiTargeting|CoMeTa|DIANA|ElMMo3|microrna.org|MirAncesTar|mirbase|miRDB|MirMAP|MirSNP|Mirza-G|RepTar|RNA22|RNAhybrid|TargetScan
RPS6KA1	Q15418		hsa-miR-28-5p	0.483315446	17	Very High	BCmicrO|BiTargeting|CoMeTa|DIANA|ElMMo3|MBStar|MAMI|microrna.org|MirAncesTar|MirMAP|MirSNP|Mirza-G|PITA|RepTar|RNA22|RNAhybrid|TargetSpy
SLC1A2	P43004		hsa-miR-28-5p	0.483067601	14	Very High	BCmicrO|BiTargeting|CoMeTa|DIANA|ElMMo3|MBStar|MirAncesTar|miRDB|MirMAP|MultiMiTar|RepTar|RNAhybrid|TargetRank|TargetSpy
FEM1C	Q96JP0		hsa-miR-28-5p	0.482790423	13	Very High	BCmicrO|CoMeTa|DIANA|ElMMo3|microrna.org|MirAncesTar|miRDB|MirMAP|MirSNP|Mirza-G|MultiMiTar|RepTar|TargetSpy
BHLHE40	O14503		hsa-miR-28-5p	0.482225236	14	Very High	BCmicrO|BiTargeting|DIANA|ElMMo3|microrna.org|MirAncesTar|miRDB|MirMAP|miRTar2GO|Mirza-G|MultiMiTar|RepTar|RNAhybrid|TargetSpy
ITGB8	P26012		hsa-miR-28-5p	0.481763386	11	Very High	BCmicrO|BiTargeting|DIANA|MBStar|MirAncesTar|MirMAP|miRTar2GO|MultiMiTar|RepTar|RNAhybrid|TargetScan
ATP2B1	P20020		hsa-miR-28-5p	0.481608612	11	Very High	BCmicrO|CoMeTa|Cupid|DIANA|MBStar|MirAncesTar|MirMAP|miRTar2GO|MultiMiTar|RepTar|RNAhybrid
HNRNPC	P07910		hsa-miR-28-5p	0.481328335	10	Very High	BCmicrO|DIANA|MBStar|microrna.org|MirAncesTar|MirMAP|Mirza-G|MultiMiTar|RNAhybrid|TargetScan
YPEL3	P61236		hsa-miR-28-5p	0.480722413	13	Very High	BCmicrO|BiTargeting|ElMMo3|microrna.org|MirAncesTar|miRDB|MirMAP|MirTar|Mirza-G|MultiMiTar|PACCMIT|RepTar|RNAhybrid
TSPAN7	P41732		hsa-miR-28-5p	0.480433418	13	Very High	BCmicrO|BiTargeting|CoMeTa|ElMMo3|MBStar|microrna.org|MirAncesTar|miRDB|MirMAP|MultiMiTar|RepTar|RNAhybrid|TargetRank
CDON	Q4KMG0		hsa-miR-28-5p	0.480317007	15	Very High	BCmicrO|BiTargeting|CoMeTa|DIANA|ElMMo3|MBStar|microrna.org|MirAncesTar|miRDB|MirMAP|miRTar2GO|Mirza-G|PITA|RepTar|RNAhybrid
RAP1A	P62834		hsa-miR-28-5p	0.479838448	16	Very High	BCmicrO|BiTargeting|Cupid|DIANA|ElMMo3|MBStar|microrna.org|MirAncesTar|miRDB|MirMAP|miRTar2GO|Mirza-G|PACCMIT|RepTar|RNA22|RNAhybrid
HNRNPDL	O14979		hsa-miR-28-5p	0.479416256	14	Very High	BCmicrO|CoMeTa|DIANA|ElMMo3|microrna.org|MirAncesTar|miRDB|MirMAP|miRTar2GO|Mirza-G|PITA|RepTar|RNAhybrid|TargetSpy
RCE1	Q9Y256		hsa-miR-28-5p	0.479271803	14	Very High	BCmicrO|CoMeTa|DIANA|ElMMo3|microrna.org|MirAncesTar|mirbase|miRDB|MirMAP|miRTar2GO|Mirza-G|PITA|RepTar|RNAhybrid
PREPL	Q4J6C6		hsa-miR-28-5p	0.479122632	14	Very High	BCmicrO|DIANA|ElMMo3|MBStar|microrna.org|MirAncesTar|miRDB|MirMAP|MirTar|Mirza-G|PITA|RepTar|RNAhybrid|TargetSpy
BAZ1B	Q9UIG0		hsa-miR-28-5p	0.478726843	14	Very High	BCmicrO|BiTargeting|DIANA|ElMMo3|microrna.org|MirAncesTar|miRDB|MirMAP|miRTar2GO|Mirza-G|MultiMiTar|RepTar|RNAhybrid|TargetRank
PTP4A1	Q93096		hsa-miR-28-5p	0.478435373	7	Very High	BCmicrO|MBStar|MAMI|microrna.org|MirAncesTar|miRTar2GO|RNAhybrid
NCAM1	P13591		hsa-miR-28-5p	0.478408925	16	Very High	BCmicrO|BiTargeting|CoMeTa|DIANA|ElMMo3|MBStar|microrna.org|MirAncesTar|miRDB|MirMAP|Mirza-G|MultiMiTar|PITA|RepTar|RNAhybrid|TargetSpy
DAP	P51397		hsa-miR-28-5p	0.477703831	12	Very High	BCmicrO|DIANA|ElMMo3|microrna.org|MirAncesTar|miRDB|MirMAP|MirTar|PACCMIT|RepTar|RNAhybrid|TargetScan
TEX14	Q8IWB6		hsa-miR-28-5p	0.477625139	15	Very High	BCmicrO|BiTargeting|CoMeTa|DIANA|ElMMo3|microrna.org|MirAncesTar|mirbase|MirMAP|MirSNP|Mirza-G|PITA|RepTar|RNAhybrid|TargetSpy
RAB14	P61106		hsa-miR-28-5p	0.477042383	13	Very High	BCmicrO|BiTargeting|CoMeTa|DIANA|ElMMo3|microrna.org|MirAncesTar|miRDB|MirMAP|miRTar2GO|PACCMIT|RepTar|TargetSpy
AMMECR1L	Q6DCA0		hsa-miR-28-5p	0.477015761	14	Very High	BCmicrO|BiTargeting|DIANA|ElMMo3|MBStar|MirAncesTar|miRDB|MirMAP|miRTar2GO|Mirza-G|MultiMiTar|PITA|RepTar|TargetRank
ADCY2	Q08462		hsa-miR-28-5p	0.476920904	13	Very High	BCmicrO|BiTargeting|DIANA|ElMMo3|MBStar|microrna.org|MirAncesTar|miRDB|MirMAP|Mirza-G|MultiMiTar|RepTar|TargetRank
PBK	Q96KB5		hsa-miR-28-5p	0.476653632	13	Very High	BCmicrO|DIANA|ElMMo3|MAMI|microrna.org|MirAncesTar|mirbase|miRDB|MirMAP|Mirza-G|PACCMIT|RepTar|RNAhybrid
RELA	Q04206		hsa-miR-28-5p	0.476544522	11	Very High	BCmicrO|BiTargeting|CoMeTa|DIANA|MBStar|microrna.org|MirAncesTar|MirMAP|PACCMIT|RNAhybrid|TargetScan
MEF2D	Q14814		hsa-miR-28-5p	0.476457783	15	Very High	BCmicrO|BiTargeting|CoMeTa|DIANA|ElMMo3|MirAncesTar|miRDB|MirMAP|Mirza-G|MultiMiTar|PITA|RepTar|RNA22|RNAhybrid|TargetRank
ANKRD52	Q8NB46		hsa-miR-28-5p	0.476173899	9	Very High	BCmicrO|Cupid|DIANA|MirAncesTar|MirMAP|miRTar2GO|MultiMiTar|PITA|TargetScan
PAFAH1B2	P68402		hsa-miR-28-5p	0.475925502	13	Very High	BCmicrO|BiTargeting|CoMeTa|DIANA|ElMMo3|microrna.org|MirAncesTar|miRDB|MirMAP|miRTar2GO|Mirza-G|RNAhybrid|TargetScan
ST7	Q9NRC1		hsa-miR-28-5p	0.475219527	15	Very High	BCmicrO|BiTargeting|DIANA|ElMMo3|microrna.org|MirAncesTar|mirbase|miRDB|MirMAP|miRTar2GO|Mirza-G|MultiMiTar|PITA|RepTar|RNAhybrid
EEF1AKMT3	Q96AZ1		hsa-miR-28-5p	0.47487916	16	Very High	BCmicrO|BiTargeting|CoMeTa|DIANA|ElMMo3|MBStar|microrna.org|MirAncesTar|miRDB|MirMAP|Mirza-G|MultiMiTar|PITA|RepTar|RNAhybrid|TargetSpy
SELL	P14151		hsa-miR-28-5p	0.474492777	14	Very High	BCmicrO|BiTargeting|DIANA|ElMMo3|MBStar|MAMI|microrna.org|MirAncesTar|miRDB|MirMAP|Mirza-G|PITA|RepTar|RNA22
RBBP5	Q15291		hsa-miR-28-5p	0.474486462	13	Very High	BCmicrO|DIANA|ElMMo3|MBStar|MirAncesTar|miRDB|MirMAP|MirTar|miRTar2GO|Mirza-G|RNA22|TargetScan|TargetSpy
ITSN1	Q15811		hsa-miR-28-5p	0.474209604	14	Very High	BCmicrO|BiTargeting|CoMeTa|DIANA|ElMMo3|MBStar|microrna.org|MirAncesTar|MirMAP|miRTar2GO|Mirza-G|RepTar|RNAhybrid|TargetRank
CDKN1A	P38936		hsa-miR-28-5p	0.473800324	16	Very High	BCmicrO|BiTargeting|CoMeTa|DIANA|ElMMo3|MBStar|microrna.org|MirAncesTar|miRDB|MirMAP|MirSNP|Mirza-G|PITA|RepTar|RNAhybrid|TargetSpy
ARL17A	Q8IVW1		hsa-miR-28-5p	0.473305481	14	Very High	BCmicrO|BiTargeting|DIANA|ElMMo3|MBStar|microrna.org|MirAncesTar|miRDB|MirMAP|MirSNP|MirTar|Mirza-G|RNAhybrid|TargetSpy
ENPEP	Q07075		hsa-miR-28-5p	0.470642575	14	Very High	BCmicrO|BiTargeting|DIANA|ElMMo3|MBStar|microrna.org|MirAncesTar|miRDB|MirMAP|Mirza-G|RepTar|RNAhybrid|TargetScan|TargetSpy
PTGS2	P35354		hsa-miR-28-5p	0.470264135	15	Very High	BCmicrO|BiTargeting|CoMeTa|DIANA|ElMMo3|microrna.org|MirAncesTar|miRDB|MirMAP|MirSNP|PITA|RepTar|RNAhybrid|TargetRank|TargetSpy
GLYAT	Q6IB77		hsa-miR-28-5p	0.469921041	13	Very High	BCmicrO|CoMeTa|DIANA|ElMMo3|microrna.org|MirAncesTar|miRDB|MirMAP|Mirza-G|RepTar|RNAhybrid|TargetRank|TargetSpy
SFXN2	Q96NB2		hsa-miR-28-5p	0.46926552	11	Very High	BCmicrO|DIANA|ElMMo3|microrna.org|MirAncesTar|MirMAP|miRTar2GO|Mirza-G|RepTar|RNAhybrid|TargetScan
HIPK1	Q86Z02		hsa-miR-28-5p	0.468939246	13	Very High	BCmicrO|CoMeTa|DIANA|ElMMo3|MBStar|MirAncesTar|miRDB|MirMAP|miRTar2GO|MultiMiTar|RepTar|RNA22|RNAhybrid
ZFAT	Q9P243		hsa-miR-28-5p	0.468395684	14	Very High	BCmicrO|DIANA|ElMMo3|microrna.org|MirAncesTar|miRDB|MirMAP|miRTar2GO|Mirza-G|PITA|RepTar|RNAhybrid|TargetRank|TargetSpy
AMMECR1	Q9Y4X0		hsa-miR-28-5p	0.468282324	13	Very High	BCmicrO|CoMeTa|DIANA|ElMMo3|microrna.org|MirAncesTar|miRDB|MirMAP|miRTar2GO|Mirza-G|MultiMiTar|RepTar|TargetSpy
FOXO3	O43524		hsa-miR-28-5p	0.468210189	12	Very High	BCmicrO|CoMeTa|DIANA|ElMMo3|MBStar|MirAncesTar|miRDB|MirMAP|MultiMiTar|RepTar|RNAhybrid|TargetScan
UBE2Z	Q9H832		hsa-miR-28-5p	0.468052326	14	Very High	BCmicrO|BiTargeting|CoMeTa|DIANA|ElMMo3|MBStar|microrna.org|MirAncesTar|miRDB|MirMAP|miRTar2GO|MultiMiTar|RepTar|RNAhybrid
DPYD	Q12882		hsa-miR-28-5p	0.467736388	13	Very High	BCmicrO|CoMeTa|ElMMo3|MBStar|microrna.org|MirAncesTar|MirMAP|MirTar|miRTar2GO|Mirza-G|MultiMiTar|RNA22|RNAhybrid
ARHGAP5	Q13017		hsa-miR-28-5p	0.467707596	11	Very High	BCmicrO|CoMeTa|Cupid|MBStar|MirAncesTar|MirMAP|miRTar2GO|Mirza-G|MultiMiTar|RepTar|RNAhybrid
ENSA	O43768		hsa-miR-28-5p	0.467171495	15	Very High	BCmicrO|BiTargeting|CoMeTa|DIANA|ElMMo3|MBStar|microrna.org|MirAncesTar|MirMAP|miRTar2GO|Mirza-G|MultiMiTar|RepTar|RNA22|RNAhybrid
DOCK4	Q8N1I0		hsa-miR-28-5p	0.466885381	15	Very High	BCmicrO|CoMeTa|DIANA|ElMMo3|MBStar|microrna.org|MirAncesTar|mirbase|miRDB|MirMAP|miRTar2GO|Mirza-G|RepTar|RNAhybrid|TargetSpy
TPRG1L	Q5T0D9		hsa-miR-28-5p	0.466384481	11	Very High	BCmicrO|BiTargeting|ElMMo3|MAMI|MirAncesTar|miRDB|MirMAP|miRTar2GO|RepTar|RNA22|RNAhybrid
NDE1	Q9NXR1		hsa-miR-28-5p	0.464650874	16	Very High	BCmicrO|BiTargeting|CoMeTa|DIANA|ElMMo3|MBStar|microrna.org|MirAncesTar|miRDB|MirMAP|MirSNP|MultiMiTar|PACCMIT|PITA|RepTar|RNAhybrid
LSM12	Q3MHD2		hsa-miR-28-5p	0.464011212	12	Very High	BCmicrO|CoMeTa|DIANA|ElMMo3|microrna.org|MirAncesTar|miRDB|MirMAP|MultiMiTar|PACCMIT|RepTar|RNAhybrid
SV2B	Q7L1I2		hsa-miR-28-5p	0.463790911	12	Very High	BCmicrO|CoMeTa|DIANA|ElMMo3|MBStar|microrna.org|MirAncesTar|miRDB|MirMAP|MirTar|RepTar|RNAhybrid
RAB28	P51157		hsa-miR-28-5p	0.463427227	15	Very High	BCmicrO|BiTargeting|CoMeTa|ElMMo3|MBStar|microrna.org|MirAncesTar|mirbase|miRDB|MirMAP|miRTar2GO|Mirza-G|MultiMiTar|RepTar|RNAhybrid
SNUPN	O95149		hsa-miR-28-5p	0.462756933	15	Very High	BCmicrO|ElMMo3|MBStar|microrna.org|MirAncesTar|mirbase|miRDB|MirMAP|MirSNP|miRTar2GO|Mirza-G|RepTar|RNAhybrid|TargetRank|TargetSpy
NUP98	P52948		hsa-miR-28-5p	0.462194059	13	Very High	BCmicrO|CoMeTa|DIANA|ElMMo3|microrna.org|MirAncesTar|miRDB|MirMAP|Mirza-G|MultiMiTar|RepTar|RNAhybrid|TargetSpy
STAP1	Q9ULZ2		hsa-miR-28-5p	0.46213711	10	Very High	BCmicrO|CoMeTa|ElMMo3|MAMI|microrna.org|MirAncesTar|mirbase|RNAhybrid|TargetRank|TargetSpy
RPL28	P46779		hsa-miR-28-5p	0.462046087	13	Very High	BCmicrO|BiTargeting|DIANA|ElMMo3|MBStar|MirAncesTar|miRDB|MirMAP|MirSNP|miRTar2GO|RNAhybrid|TargetScan|TargetSpy
TMUB1	Q9BVT8		hsa-miR-28-5p	0.461564633	15	Very High	BCmicrO|BiTargeting|DIANA|ElMMo3|MBStar|MAMI|microrna.org|MirAncesTar|mirbase|miRDB|MirMAP|MirSNP|miRTar2GO|RepTar|RNAhybrid
IQGAP1	P46940		hsa-miR-28-5p	0.460629746	13	Very High	BCmicrO|DIANA|ElMMo3|microrna.org|MirAncesTar|miRDB|MirMAP|MirTar|miRTar2GO|Mirza-G|RepTar|RNAhybrid|TargetSpy
HOXD8	P13378		hsa-miR-28-5p	0.460119155	9	Very High	BCmicrO|DIANA|ElMMo3|MBStar|MAMI|MirAncesTar|miRDB|MirMAP|RNAhybrid
CHRM2	P08172		hsa-miR-28-5p	0.459838438	15	Very High	BCmicrO|BiTargeting|DIANA|ElMMo3|MBStar|microrna.org|MirAncesTar|miRDB|MirMAP|MirTar|Mirza-G|MultiMiTar|RepTar|RNAhybrid|TargetRank
ARAP3	Q8WWN8		hsa-miR-28-5p	0.459429051	13	Very High	BCmicrO|CoMeTa|ElMMo3|microrna.org|MirAncesTar|miRDB|MirMAP|miRTar2GO|Mirza-G|MultiMiTar|PACCMIT|RepTar|RNAhybrid
HELZ	P42694		hsa-miR-28-5p	0.459076581	15	Very High	BCmicrO|BiTargeting|DIANA|ElMMo3|MBStar|MirAncesTar|mirbase|miRDB|MirMAP|miRTar2GO|MultiMiTar|PITA|RepTar|RNAhybrid|TargetSpy
GNG2	P59768		hsa-miR-28-5p	0.458424291	15	Very High	BCmicrO|BiTargeting|DIANA|ElMMo3|MBStar|microrna.org|MirAncesTar|mirbase|miRDB|MirMAP|Mirza-G|MultiMiTar|RepTar|RNAhybrid|TargetSpy
GLRX	P35754		hsa-miR-28-5p	0.458344422	15	Very High	BCmicrO|DIANA|ElMMo3|MBStar|MAMI|microrna.org|MirAncesTar|miRDB|MirMAP|MirSNP|miRTar2GO|Mirza-G|RepTar|RNAhybrid|TargetSpy
CDK19	Q9BWU1		hsa-miR-28-5p	0.457979468	11	Very High	BCmicrO|BiTargeting|CoMeTa|MBStar|MirAncesTar|MirSNP|miRTar2GO|MultiMiTar|PITA|RepTar|RNAhybrid
CD44	P16070		hsa-miR-28-5p	0.457934365	15	Very High	BCmicrO|BiTargeting|DIANA|ElMMo3|MBStar|microrna.org|MirAncesTar|miRDB|MirMAP|MirTar|miRTar2GO|RepTar|RNAhybrid|TargetRank|TargetSpy
TMEM109	Q9BVC6		hsa-miR-28-5p	0.457858627	10	Very High	BCmicrO|DIANA|ElMMo3|MAMI|MirAncesTar|miRDB|MirMAP|miRTar2GO|RepTar|RNAhybrid
IGSF9B	Q9UPX0		hsa-miR-28-5p	0.457326948	12	Very High	BCmicrO|CoMeTa|DIANA|ElMMo3|MirAncesTar|mirbase|MirMAP|MirTar|Mirza-G|RepTar|RNAhybrid|TargetRank
PCGF5	Q86SE9		hsa-miR-28-5p	0.457266679	14	Very High	BCmicrO|BiTargeting|DIANA|ElMMo3|MBStar|microrna.org|MirAncesTar|miRDB|MirMAP|miRTar2GO|Mirza-G|RepTar|TargetRank|TargetSpy
PTPRF	P10586		hsa-miR-28-5p	0.457085656	11	Very High	BCmicrO|CoMeTa|ElMMo3|MirAncesTar|miRDB|MirMAP|MultiMiTar|PACCMIT|RNA22|RNAhybrid|TargetScan
KALRN	O60229		hsa-miR-28-5p	0.457042356	16	Very High	BCmicrO|BiTargeting|CoMeTa|DIANA|ElMMo3|MBStar|microrna.org|MirAncesTar|miRDB|MirMAP|Mirza-G|MultiMiTar|PITA|RepTar|RNAhybrid|TargetSpy
CASC3	O15234		hsa-miR-28-5p	0.456166704	13	Very High	BCmicrO|BiTargeting|DIANA|ElMMo3|microrna.org|MirAncesTar|miRDB|MirMAP|miRTar2GO|Mirza-G|RepTar|RNAhybrid|TargetRank
TMEM167B	Q9NRX6		hsa-miR-28-5p	0.455409664	13	Very High	BCmicrO|BiTargeting|DIANA|ElMMo3|microrna.org|MirAncesTar|mirbase|miRDB|MirMAP|MirTar|Mirza-G|RepTar|RNA22
ATCAY	Q86WG3		hsa-miR-28-5p	0.454798507	12	Very High	BCmicrO|BiTargeting|DIANA|ElMMo3|MAMI|MirAncesTar|miRDB|MirMAP|Mirza-G|PITA|RepTar|RNAhybrid
SLC4A11	Q8NBS3		hsa-miR-28-5p	0.454692114	14	Very High	BCmicrO|BiTargeting|DIANA|ElMMo3|MBStar|microrna.org|MirAncesTar|mirbase|miRDB|MirMAP|MirTar|RepTar|RNAhybrid|TargetSpy
DHX40	Q8IX18		hsa-miR-28-5p	0.453927824	10	Very High	BCmicrO|CoMeTa|Cupid|DIANA|ElMMo3|MirAncesTar|MirMAP|miRTar2GO|MultiMiTar|RNAhybrid
MTMR2	Q13614		hsa-miR-28-5p	0.453871618	16	Very High	BCmicrO|BiTargeting|DIANA|ElMMo3|MBStar|microrna.org|MirAncesTar|miRDB|MirMAP|MirSNP|miRTar2GO|Mirza-G|MultiMiTar|RepTar|RNAhybrid|TargetSpy
HIF1A	Q16665		hsa-miR-28-5p	0.45312268	11	Very High	BCmicrO|Cupid|MBStar|microrna.org|MirAncesTar|MirMAP|miRTar2GO|Mirza-G|MultiMiTar|PITA|RNAhybrid
MYO5A	Q9Y4I1		hsa-miR-28-5p	0.451609407	13	Very High	BCmicrO|BiTargeting|CoMeTa|ElMMo3|MBStar|MirAncesTar|miRDB|MirMAP|miRTar2GO|MultiMiTar|PITA|RepTar|RNAhybrid
CD209	Q9NNX6		hsa-miR-28-5p	0.451199314	15	Very High	BCmicrO|BiTargeting|CoMeTa|DIANA|ElMMo3|microrna.org|MirAncesTar|miRDB|MirMAP|MirSNP|Mirza-G|MultiMiTar|PITA|RepTar|RNAhybrid
SH2B1	Q9NRF2		hsa-miR-28-5p	0.45106599	14	Very High	BCmicrO|BiTargeting|CoMeTa|DIANA|ElMMo3|microrna.org|MirAncesTar|mirbase|miRDB|MirMAP|MirSNP|miRTar2GO|MultiMiTar|RNAhybrid
TMA16	Q96EY4		hsa-miR-28-5p	0.451003013	14	Very High	BCmicrO|DIANA|ElMMo3|MBStar|microrna.org|MirAncesTar|miRDB|MirMAP|MirTar|miRTar2GO|Mirza-G|RepTar|RNAhybrid|TargetSpy
DHX16	O60231		hsa-miR-28-5p	0.450897662	12	Very High	BCmicrO|CoMeTa|Cupid|DIANA|ElMMo3|microrna.org|MirAncesTar|mirbase|miRDB|MirMAP|RepTar|RNAhybrid
ZDHHC18	Q9NUE0		hsa-miR-28-5p	0.450759998	15	Very High	BCmicrO|BiTargeting|CoMeTa|DIANA|ElMMo3|MirAncesTar|mirbase|miRDB|MirMAP|miRTar2GO|PACCMIT|PITA|RepTar|RNA22|RNAhybrid
TMEM184B	Q9Y519		hsa-miR-28-5p	0.450647383	13	Very High	BCmicrO|DIANA|ElMMo3|MBStar|microrna.org|MirAncesTar|miRDB|MirMAP|miRTar2GO|MultiMiTar|PITA|RepTar|RNAhybrid
UNK	Q9C0B0		hsa-miR-28-5p	0.450514547	13	Very High	BCmicrO|BiTargeting|DIANA|ElMMo3|microrna.org|MirAncesTar|miRDB|MirMAP|MirTar|miRTar2GO|RepTar|RNAhybrid|TargetRank
HMGA2	P52926		hsa-miR-28-5p	0.450253208	11	Very High	BCmicrO|CoMeTa|Cupid|DIANA|MBStar|MirAncesTar|MirMAP|miRTar2GO|MultiMiTar|PITA|RNAhybrid
ABCA5	Q8WWZ7		hsa-miR-28-5p	0.450026259	14	Very High	BCmicrO|DIANA|ElMMo3|MBStar|microrna.org|MirAncesTar|miRDB|MirMAP|MirTar|Mirza-G|RepTar|RNAhybrid|TargetRank|TargetSpy
CALCOCO2	Q13137		hsa-miR-28-5p	0.449733198	13	Very High	BCmicrO|DIANA|ElMMo3|microrna.org|MirAncesTar|miRDB|MirMAP|miRTar2GO|Mirza-G|RepTar|RNAhybrid|TargetScan|TargetSpy
LSMEM1	Q8N8F7		hsa-miR-28-5p	0.449693172	14	Very High	BCmicrO|DIANA|ElMMo3|MBStar|microrna.org|MirAncesTar|MirMAP|MirTar|Mirza-G|PITA|RepTar|RNAhybrid|TargetRank|TargetSpy
PEAK1	Q9H792		hsa-miR-28-5p	0.449631882	14	Very High	BCmicrO|BiTargeting|DIANA|ElMMo3|MBStar|microrna.org|MirAncesTar|miRDB|MirMAP|MirTar|miRTar2GO|RepTar|RNAhybrid|TargetRank
B4GALT4	O60513		hsa-miR-28-5p	0.449198416	15	Very High	BCmicrO|BiTargeting|CoMeTa|DIANA|ElMMo3|microrna.org|MirAncesTar|miRDB|MirMAP|miRTar2GO|Mirza-G|PITA|RepTar|RNAhybrid|TargetSpy
SNCAIP	Q9Y6H5		hsa-miR-28-5p	0.448950791	15	Very High	BCmicrO|CoMeTa|DIANA|ElMMo3|MBStar|MAMI|microrna.org|MirAncesTar|mirbase|miRDB|MirMAP|Mirza-G|PITA|RepTar|RNAhybrid
PCDH19	Q8TAB3		hsa-miR-28-5p	0.448898517	11	Very High	BCmicrO|DIANA|MBStar|MAMI|MirAncesTar|mirbase|MirMAP|miRTar2GO|MultiMiTar|RepTar|RNAhybrid
ZNF655	Q8N720		hsa-miR-28-5p	0.448327568	12	Very High	BCmicrO|ElMMo3|MBStar|microrna.org|MirAncesTar|MirMAP|MirSNP|miRTar2GO|Mirza-G|MultiMiTar|RepTar|RNAhybrid
NDOR1	Q9UHB4		hsa-miR-28-5p	0.448261567	14	Very High	BCmicrO|DIANA|ElMMo3|MBStar|MirAncesTar|mirbase|miRDB|MirMAP|MirSNP|miRTar2GO|Mirza-G|PITA|RepTar|RNAhybrid
DSEL	Q8IZU8		hsa-miR-28-5p	0.448221605	12	Very High	BCmicrO|BiTargeting|DIANA|ElMMo3|MBStar|microrna.org|MirAncesTar|miRDB|MirMAP|Mirza-G|TargetRank|TargetScan
AGTR2	P50052		hsa-miR-28-5p	0.44787462	13	Very High	BCmicrO|DIANA|ElMMo3|MBStar|microrna.org|miRDB|MirMAP|MirTar|Mirza-G|RepTar|RNAhybrid|TargetRank|TargetSpy
CKAP2	Q8WWK9		hsa-miR-28-5p	0.44718148	15	Very High	BCmicrO|BiTargeting|CoMeTa|DIANA|ElMMo3|MBStar|microrna.org|MirAncesTar|mirbase|miRDB|MirMAP|miRTar2GO|Mirza-G|RepTar|RNAhybrid
CD28	P10747		hsa-miR-28-5p	0.447073151	10	Very High	BCmicrO|BiTargeting|ElMMo3|MBStar|MAMI|MirAncesTar|miRDB|MirMAP|MultiMiTar|RepTar
FSHB	P01225		hsa-miR-28-5p	0.446748878	12	Very High	BCmicrO|DIANA|ElMMo3|microrna.org|MirAncesTar|miRDB|MirMAP|MirTar|Mirza-G|RepTar|RNAhybrid|TargetRank
TNRC6B	Q9UPQ9		hsa-miR-28-5p	0.44619691	14	Very High	BCmicrO|CoMeTa|Cupid|DIANA|ElMMo3|MBStar|MirAncesTar|miRDB|MirMAP|miRTar2GO|Mirza-G|RepTar|RNAhybrid|TargetSpy
HMGCLL1	Q8TB92		hsa-miR-28-5p	0.445732596	15	Very High	BCmicrO|BiTargeting|DIANA|ElMMo3|MBStar|microrna.org|MirAncesTar|mirbase|miRDB|MirMAP|Mirza-G|MultiMiTar|PITA|RepTar|RNAhybrid
C14orf28	Q4W4Y0		hsa-miR-28-5p	0.445680777	12	Very High	BCmicrO|DIANA|ElMMo3|microrna.org|MirAncesTar|miRDB|MirMAP|miRTar2GO|Mirza-G|RepTar|RNAhybrid|TargetRank
B4GALT3	O60512		hsa-miR-28-5p	0.444923215	14	Very High	BCmicrO|BiTargeting|CoMeTa|DIANA|ElMMo3|microrna.org|MirAncesTar|mirbase|MirMAP|MultiMiTar|PITA|RepTar|RNAhybrid|TargetSpy
SPRY3	O43610		hsa-miR-28-5p	0.443817024	11	Very High	BCmicrO|DIANA|ElMMo3|MBStar|MirAncesTar|miRDB|MirMAP|PACCMIT|RepTar|TargetScan|TargetSpy
ZNF740	Q8NDX6		hsa-miR-28-5p	0.44357799	14	Very High	BCmicrO|BiTargeting|DIANA|ElMMo3|MBStar|microrna.org|MirAncesTar|miRDB|MirMAP|miRTar2GO|Mirza-G|RepTar|TargetRank|TargetSpy
GNAI1	P63096		hsa-miR-28-5p	0.44344375	14	Very High	BCmicrO|CoMeTa|DIANA|ElMMo3|MBStar|microrna.org|MirAncesTar|miRDB|MirMAP|Mirza-G|RepTar|RNAhybrid|TargetRank|TargetSpy
STK19	P49842		hsa-miR-28-5p	0.443110444	14	Very High	BCmicrO|CoMeTa|DIANA|ElMMo3|MBStar|MAMI|microrna.org|MirAncesTar|mirbase|miRDB|MirMAP|PACCMIT|RepTar|RNAhybrid
PSME3	P61289		hsa-miR-28-5p	0.442634072	13	Very High	BCmicrO|CoMeTa|DIANA|ElMMo3|MBStar|microrna.org|MirAncesTar|miRDB|MirMAP|miRTar2GO|Mirza-G|RepTar|RNAhybrid
FAM228A	Q86W67		hsa-miR-28-5p	0.442458054	15	Very High	BCmicrO|DIANA|ElMMo3|MBStar|microrna.org|MirAncesTar|mirbase|miRDB|MirMAP|MirSNP|MirTar|Mirza-G|RepTar|RNAhybrid|TargetSpy
SDC1	P18827		hsa-miR-28-5p	0.442381145	14	Very High	BCmicrO|BiTargeting|CoMeTa|DIANA|ElMMo3|MBStar|microrna.org|MirAncesTar|miRDB|MirMAP|miRTar2GO|PACCMIT|RepTar|RNAhybrid
RAB23	Q9ULC3		hsa-miR-28-5p	0.442200232	14	Very High	BCmicrO|BiTargeting|CoMeTa|DIANA|ElMMo3|MBStar|MirAncesTar|miRDB|MirMAP|miRTar2GO|Mirza-G|MultiMiTar|PITA|RepTar
EPDR1	Q9UM22		hsa-miR-28-5p	0.441669866	15	Very High	BCmicrO|BiTargeting|DIANA|ElMMo3|MBStar|microrna.org|MirAncesTar|mirbase|miRDB|MirMAP|miRTar2GO|Mirza-G|PITA|RepTar|RNAhybrid
DCAF7	P61962		hsa-miR-28-5p	0.441265505	12	Very High	BCmicrO|BiTargeting|DIANA|ElMMo3|MBStar|MirAncesTar|miRDB|MirMAP|miRTar2GO|MultiMiTar|RepTar|RNAhybrid
VASH1	Q7L8A9		hsa-miR-28-5p	0.441163823	14	Very High	BCmicrO|BiTargeting|DIANA|ElMMo3|MBStar|MirAncesTar|miRDB|MirMAP|Mirza-G|MultiMiTar|RepTar|RNAhybrid|TargetRank|TargetSpy
WNT5B	Q9H1J7		hsa-miR-28-5p	0.441160699	13	Very High	BCmicrO|DIANA|ElMMo3|microrna.org|MirAncesTar|miRDB|MirMAP|MirSNP|Mirza-G|PACCMIT|RepTar|RNAhybrid|TargetRank
SMARCC1	Q92922		hsa-miR-28-5p	0.441112159	12	Very High	BCmicrO|CoMeTa|DIANA|ElMMo3|microrna.org|MirAncesTar|miRDB|MirMAP|miRTar2GO|Mirza-G|RepTar|TargetSpy
EPN2	O95208		hsa-miR-28-5p	0.440635417	14	Very High	BCmicrO|BiTargeting|CoMeTa|ElMMo3|MBStar|microrna.org|MirAncesTar|miRDB|MirMAP|Mirza-G|PITA|RepTar|RNAhybrid|TargetRank
ELMSAN1	Q6PJG2		hsa-miR-28-5p	0.440197267	16	Very High	BCmicrO|BiTargeting|CoMeTa|DIANA|ElMMo3|MBStar|microrna.org|MirAncesTar|miRDB|MirMAP|miRTar2GO|Mirza-G|PITA|RepTar|RNAhybrid|TargetSpy
ANK2	Q01484		hsa-miR-28-5p	0.440144349	12	Very High	BCmicrO|CoMeTa|Cupid|DIANA|ElMMo3|MBStar|microrna.org|MirAncesTar|miRDB|MirMAP|MultiMiTar|RNAhybrid
ZNF569	Q5MCW4		hsa-miR-28-5p	0.439076199	13	Very High	BCmicrO|BiTargeting|DIANA|ElMMo3|MAMI|microrna.org|MirAncesTar|miRDB|MirMAP|Mirza-G|RepTar|RNAhybrid|TargetRank
CFAP97	Q9P2B7		hsa-miR-28-5p	0.439051229	11	Very High	BCmicrO|DIANA|ElMMo3|microrna.org|MirAncesTar|miRDB|MirMAP|Mirza-G|PITA|RNAhybrid|TargetScan
RC3H1	Q5TC82		hsa-miR-28-5p	0.439002161	12	Very High	BCmicrO|Cupid|DIANA|MBStar|MirAncesTar|MirMAP|miRTar2GO|Mirza-G|MultiMiTar|RepTar|RNA22|RNAhybrid
CAPN6	Q9Y6Q1		hsa-miR-28-5p	0.438745179	12	Very High	BCmicrO|CoMeTa|Cupid|DIANA|ElMMo3|MBStar|microrna.org|MirAncesTar|miRDB|MirMAP|MultiMiTar|RepTar
SBNO1	A3KN83		hsa-miR-28-5p	0.438674956	11	Very High	BiTargeting|Cupid|DIANA|ElMMo3|MBStar|MirAncesTar|miRDB|MirMAP|miRTar2GO|Mirza-G|TargetScan
GRIN3A	Q8TCU5		hsa-miR-28-5p	0.438418875	12	Very High	BCmicrO|DIANA|ElMMo3|MBStar|MirAncesTar|miRDB|MirMAP|Mirza-G|MultiMiTar|RepTar|TargetRank|TargetSpy
ATXN7L1	Q9ULK2		hsa-miR-28-5p	0.438385509	15	Very High	BCmicrO|CoMeTa|DIANA|ElMMo3|MBStar|microrna.org|MirAncesTar|miRDB|MirMAP|MirSNP|miRTar2GO|Mirza-G|MultiMiTar|PITA|RNAhybrid
JMJD6	Q6NYC1		hsa-miR-28-5p	0.438245091	15	Very High	BCmicrO|BiTargeting|CoMeTa|DIANA|ElMMo3|microrna.org|MirAncesTar|miRDB|MirMAP|miRTar2GO|Mirza-G|PITA|RepTar|RNAhybrid|TargetSpy
FXYD7	P58549		hsa-miR-28-5p	0.4375557	11	Very High	BCmicrO|CoMeTa|DIANA|ElMMo3|MAMI|MirAncesTar|mirbase|miRDB|MirMAP|RepTar|RNAhybrid
SPTB	P11277		hsa-miR-28-5p	0.437100946	15	Very High	BCmicrO|BiTargeting|DIANA|ElMMo3|MBStar|MirAncesTar|mirbase|miRDB|MirMAP|Mirza-G|MultiMiTar|PACCMIT|RepTar|RNAhybrid|TargetSpy
MON2	Q7Z3U7		hsa-miR-28-5p	0.436826035	10	Very High	BCmicrO|CoMeTa|DIANA|MBStar|MirAncesTar|MirMAP|miRTar2GO|MultiMiTar|RepTar|RNAhybrid
SEMA6D	Q8NFY4		hsa-miR-28-5p	0.436354524	13	Very High	BCmicrO|BiTargeting|CoMeTa|DIANA|ElMMo3|MBStar|MirAncesTar|MirMAP|miRTar2GO|MultiMiTar|PITA|RepTar|RNAhybrid
MSTO1	Q9BUK6		hsa-miR-28-5p	0.436060773	14	Very High	BCmicrO|BiTargeting|CoMeTa|DIANA|ElMMo3|microrna.org|MirAncesTar|MirMAP|Mirza-G|MultiMiTar|PACCMIT|RepTar|RNAhybrid|TargetSpy
PCYT1B	Q9Y5K3		hsa-miR-28-5p	0.43547494	14	Very High	BCmicrO|DIANA|ElMMo3|MBStar|MirAncesTar|miRDB|MirMAP|Mirza-G|MultiMiTar|PITA|RepTar|RNAhybrid|TargetRank|TargetSpy
TANC1	Q9C0D5		hsa-miR-28-5p	0.435458061	13	Very High	BCmicrO|DIANA|ElMMo3|MBStar|microrna.org|MirAncesTar|miRDB|MirMAP|MirSNP|miRTar2GO|Mirza-G|RepTar|TargetRank
SNTB2	Q13425		hsa-miR-28-5p	0.43493058	13	Very High	BCmicrO|DIANA|ElMMo3|MBStar|MirAncesTar|miRDB|MirMAP|miRTar2GO|Mirza-G|MultiMiTar|RepTar|RNAhybrid|TargetSpy
SLC25A12	O75746		hsa-miR-28-5p	0.434787822	14	Very High	BCmicrO|DIANA|ElMMo3|MBStar|MirAncesTar|miRDB|MirMAP|MirSNP|miRTar2GO|Mirza-G|PACCMIT|RepTar|RNAhybrid|TargetScan
TEAD3	Q99594		hsa-miR-28-5p	0.434209062	12	Very High	BCmicrO|BiTargeting|CoMeTa|DIANA|ElMMo3|MirAncesTar|miRDB|MirMAP|MultiMiTar|RepTar|RNAhybrid|TargetScan
POLR2A	P24928		hsa-miR-28-5p	0.433915698	5	Very High	BCmicrO|MAMI|MirAncesTar|miRTar2GO|RNAhybrid
CD276	Q5ZPR3		hsa-miR-28-5p	0.433888093	12	Very High	BCmicrO|BiTargeting|DIANA|ElMMo3|microrna.org|MirAncesTar|miRDB|MirMAP|miRTar2GO|RepTar|RNAhybrid|TargetRank
RUNDC1	Q96C34		hsa-miR-28-5p	0.433850693	12	Very High	BCmicrO|DIANA|ElMMo3|microrna.org|MirAncesTar|miRDB|MirMAP|miRTar2GO|MultiMiTar|RepTar|RNAhybrid|TargetSpy
YES1	P07947		hsa-miR-28-5p	0.433552521	13	Very High	BCmicrO|BiTargeting|CoMeTa|DIANA|ElMMo3|microrna.org|MirAncesTar|miRDB|MirMAP|Mirza-G|MultiMiTar|PITA|RepTar
ADGRG2	Q8IZP9		hsa-miR-28-5p	0.433479225	12	Very High	BCmicrO|CoMeTa|DIANA|ElMMo3|MBStar|microrna.org|MirAncesTar|miRDB|MirMAP|Mirza-G|RNAhybrid|TargetRank
VEZT	Q9HBM0		hsa-miR-28-5p	0.433326068	13	Very High	BCmicrO|BiTargeting|CoMeTa|ElMMo3|MBStar|microrna.org|MirAncesTar|MirMAP|miRTar2GO|Mirza-G|RepTar|RNAhybrid|TargetSpy
CXADR	P78310		hsa-miR-28-5p	0.433243925	14	Very High	BCmicrO|DIANA|ElMMo3|MBStar|microrna.org|MirAncesTar|miRDB|MirMAP|miRTar2GO|Mirza-G|MultiMiTar|RepTar|RNAhybrid|TargetSpy
PHF21A	Q96BD5		hsa-miR-28-5p	0.433073353	14	Very High	BCmicrO|BiTargeting|DIANA|ElMMo3|MBStar|MirAncesTar|MirMAP|MirSNP|miRTar2GO|Mirza-G|PACCMIT|PITA|RepTar|RNAhybrid
PYROXD1	Q8WU10		hsa-miR-28-5p	0.432749019	13	Very High	BCmicrO|CoMeTa|DIANA|ElMMo3|microrna.org|MirAncesTar|miRDB|MirMAP|Mirza-G|MultiMiTar|RepTar|RNAhybrid|TargetSpy
OLFML3	Q9NRN5		hsa-miR-28-5p	0.431979963	15	Very High	BCmicrO|DIANA|ElMMo3|MBStar|MAMI|microrna.org|MirAncesTar|mirbase|miRDB|MirMAP|Mirza-G|RepTar|RNA22|RNAhybrid|TargetSpy
ANK1	P16157		hsa-miR-28-5p	0.431877005	15	Very High	BCmicrO|BiTargeting|CoMeTa|DIANA|ElMMo3|MBStar|MirAncesTar|miRDB|MirMAP|MultiMiTar|PACCMIT|PITA|RepTar|RNAhybrid|TargetSpy
TRNP1	Q6NT89		hsa-miR-28-5p	0.431221213	13	Very High	BCmicrO|BiTargeting|DIANA|ElMMo3|MirAncesTar|mirbase|miRDB|MirMAP|PITA|RepTar|RNA22|RNAhybrid|TargetScan
SLC38A2	Q96QD8		hsa-miR-28-5p	0.430892495	15	Very High	BCmicrO|BiTargeting|DIANA|ElMMo3|MBStar|microrna.org|MirAncesTar|miRDB|MirMAP|miRTar2GO|Mirza-G|RepTar|RNAhybrid|TargetRank|TargetSpy
SCAF4	O95104		hsa-miR-28-5p	0.430859731	11	Very High	BCmicrO|Cupid|DIANA|ElMMo3|microrna.org|MirAncesTar|mirbase|miRDB|MirMAP|Mirza-G|RNAhybrid
AMER1	Q5JTC6		hsa-miR-28-5p	0.430653196	13	Very High	BCmicrO|BiTargeting|DIANA|ElMMo3|MBStar|MirAncesTar|miRDB|MirMAP|MultiMiTar|PITA|RepTar|RNAhybrid|TargetScan
GSK3B	P49841		hsa-miR-28-5p	0.430457799	11	Very High	BCmicrO|DIANA|ElMMo3|MBStar|microrna.org|MirAncesTar|miRDB|MirMAP|MirTar|Mirza-G|TargetScan
CANT1	Q8WVQ1		hsa-miR-28-5p	0.429364334	13	Very High	BCmicrO|CoMeTa|DIANA|ElMMo3|microrna.org|MirAncesTar|miRDB|MirMAP|miRTar2GO|Mirza-G|RepTar|RNAhybrid|TargetSpy
CTNND1	O60716		hsa-miR-28-5p	0.429259712	12	Very High	BCmicrO|BiTargeting|CoMeTa|DIANA|MBStar|MirAncesTar|MirMAP|miRTar2GO|MultiMiTar|PITA|RepTar|RNAhybrid
CTIF	O43310		hsa-miR-28-5p	0.429190638	13	Very High	BCmicrO|BiTargeting|DIANA|ElMMo3|MBStar|MirAncesTar|miRDB|MirMAP|miRTar2GO|MultiMiTar|PITA|RepTar|TargetSpy
ZSWIM5	Q9P217		hsa-miR-28-5p	0.428890883	13	Very High	BCmicrO|Cupid|DIANA|ElMMo3|MBStar|microrna.org|MirAncesTar|mirbase|miRDB|MirMAP|miRTar2GO|RepTar|RNA22
BBS10	Q8TAM1		hsa-miR-28-5p	0.428797989	13	Very High	BCmicrO|CoMeTa|DIANA|ElMMo3|MBStar|microrna.org|MirAncesTar|miRDB|MirMAP|Mirza-G|RepTar|RNAhybrid|TargetSpy
TGFBR2	P37173		hsa-miR-28-5p	0.428627525	10	Very High	BCmicrO|BiTargeting|CoMeTa|MBStar|microrna.org|MirAncesTar|MirMAP|miRTar2GO|MultiMiTar|RepTar
ABHD4	Q8TB40		hsa-miR-28-5p	0.428377281	13	Very High	BCmicrO|BiTargeting|CoMeTa|DIANA|ElMMo3|MBStar|MirAncesTar|MirMAP|miRTar2GO|MultiMiTar|PITA|RepTar|RNAhybrid
SEMA5A	Q13591		hsa-miR-28-5p	0.428371217	12	Very High	BCmicrO|DIANA|ElMMo3|MirAncesTar|miRDB|MirMAP|Mirza-G|MultiMiTar|PITA|RepTar|TargetRank|TargetSpy
IL17RE	Q8NFR9		hsa-miR-28-5p	0.427710288	14	Very High	BCmicrO|BiTargeting|DIANA|ElMMo3|MAMI|microrna.org|MirAncesTar|mirbase|miRDB|MirMAP|Mirza-G|PITA|RepTar|RNAhybrid
CRTC3	Q6UUV7		hsa-miR-28-5p	0.42735227	15	Very High	BCmicrO|BiTargeting|DIANA|ElMMo3|MBStar|microrna.org|MirAncesTar|mirbase|miRDB|MirMAP|miRTar2GO|PITA|RepTar|RNAhybrid|TargetSpy
RGS4	P49798		hsa-miR-28-5p	0.427345723	15	Very High	BCmicrO|BiTargeting|CoMeTa|DIANA|ElMMo3|MBStar|microrna.org|MirAncesTar|miRDB|MirMAP|Mirza-G|PITA|RepTar|RNA22|RNAhybrid
POM121	Q96HA1		hsa-miR-28-5p	0.427140964	11	Very High	BCmicrO|BiTargeting|CoMeTa|DIANA|ElMMo3|MBStar|MirAncesTar|MirMAP|miRTar2GO|RepTar|TargetRank
SKAP2	O75563		hsa-miR-28-5p	0.426893853	12	Very High	BCmicrO|BiTargeting|CoMeTa|DIANA|ElMMo3|microrna.org|MirAncesTar|miRDB|MirMAP|Mirza-G|RepTar|TargetRank
CEP162	Q5TB80		hsa-miR-28-5p	0.426850991	12	Very High	BCmicrO|DIANA|ElMMo3|microrna.org|MirAncesTar|miRDB|MirMAP|Mirza-G|RepTar|RNAhybrid|TargetRank|TargetSpy
ABLIM3	O94929		hsa-miR-28-5p	0.426775935	14	Very High	BCmicrO|BiTargeting|DIANA|ElMMo3|MBStar|microrna.org|MirAncesTar|miRDB|MirMAP|Mirza-G|MultiMiTar|RepTar|RNAhybrid|TargetSpy
SLC6A12	P48065		hsa-miR-28-5p	0.426659429	12	Very High	BCmicrO|BiTargeting|DIANA|ElMMo3|MAMI|MirAncesTar|miRDB|MirMAP|Mirza-G|PITA|RepTar|RNAhybrid
BTBD7	Q9P203		hsa-miR-28-5p	0.426609495	10	Very High	BCmicrO|DIANA|ElMMo3|MBStar|MirAncesTar|MirMAP|miRTar2GO|MultiMiTar|RNAhybrid|TargetRank
RTN3	O95197		hsa-miR-28-5p	0.426522862	11	Very High	BCmicrO|BiTargeting|CoMeTa|MBStar|MirAncesTar|MirMAP|miRTar2GO|MultiMiTar|PITA|RepTar|RNAhybrid
FAM192A	Q9GZU8		hsa-miR-28-5p	0.426410716	15	Very High	BCmicrO|DIANA|ElMMo3|MBStar|microrna.org|MirAncesTar|mirbase|miRDB|MirMAP|MirSNP|miRTar2GO|Mirza-G|RepTar|RNAhybrid|TargetSpy
SLF1	Q9BQI6		hsa-miR-28-5p	0.426403303	12	Very High	BCmicrO|DIANA|ElMMo3|microrna.org|MirAncesTar|MirMAP|miRTar2GO|Mirza-G|RepTar|RNAhybrid|TargetRank|TargetSpy
PSMA5	P28066		hsa-miR-28-5p	0.426393788	14	Very High	BCmicrO|CoMeTa|DIANA|ElMMo3|MBStar|microrna.org|MirAncesTar|mirbase|miRDB|MirMAP|Mirza-G|RepTar|RNA22|TargetSpy
PDE3B	Q13370		hsa-miR-28-5p	0.426191623	9	Very High	BCmicrO|CoMeTa|MBStar|MAMI|MirAncesTar|mirbase|miRTar2GO|MultiMiTar|RNAhybrid
MPL	P40238		hsa-miR-28-5p	0.425857081	16	Very High	BCmicrO|BiTargeting|DIANA|ElMMo3|microrna.org|MirAncesTar|miRDB|MirMAP|MirSNP|miRTar2GO|Mirza-G|PITA|RepTar|RNA22|RNAhybrid|TargetSpy
CNTN4	Q8IWV2		hsa-miR-28-5p	0.425690797	10	Very High	BCmicrO|MBStar|microrna.org|MirAncesTar|MirMAP|miRTar2GO|Mirza-G|MultiMiTar|RNAhybrid|TargetScan
PAQR4	Q8N4S7		hsa-miR-28-5p	0.425648845	14	Very High	BCmicrO|BiTargeting|DIANA|ElMMo3|microrna.org|MirAncesTar|miRDB|MirMAP|MirSNP|MirTar|Mirza-G|RepTar|RNAhybrid|TargetRank
REXO2	Q9Y3B8		hsa-miR-28-5p	0.425506373	14	Very High	BCmicrO|CoMeTa|DIANA|ElMMo3|microrna.org|MirAncesTar|mirbase|miRDB|MirMAP|Mirza-G|PITA|RepTar|RNAhybrid|TargetSpy
SPAG1	Q07617		hsa-miR-28-5p	0.425472738	13	Very High	BCmicrO|BiTargeting|DIANA|ElMMo3|microrna.org|MirAncesTar|mirbase|miRDB|MirMAP|miRTar2GO|RepTar|RNAhybrid|TargetSpy
FASLG	P48023		hsa-miR-28-5p	0.42540524	14	Very High	BCmicrO|BiTargeting|CoMeTa|DIANA|ElMMo3|microrna.org|MirAncesTar|mirbase|miRDB|MirMAP|RepTar|RNA22|RNAhybrid|TargetSpy
TRUB1	Q8WWH5		hsa-miR-28-5p	0.425128987	13	Very High	BCmicrO|DIANA|ElMMo3|MBStar|microrna.org|MirAncesTar|miRDB|MirMAP|MirSNP|Mirza-G|PACCMIT|RepTar|TargetRank
PKN2	Q16513		hsa-miR-28-5p	0.425019902	12	Very High	BCmicrO|DIANA|ElMMo3|MBStar|MirAncesTar|mirbase|MirMAP|miRTar2GO|MultiMiTar|PACCMIT|RNAhybrid|TargetSpy
FRMD4B	Q9Y2L6		hsa-miR-28-5p	0.424992612	15	Very High	BCmicrO|BiTargeting|CoMeTa|DIANA|ElMMo3|MBStar|microrna.org|MirAncesTar|mirbase|miRDB|MirMAP|Mirza-G|PITA|RepTar|RNAhybrid
TMEM170A	Q8WVE7		hsa-miR-28-5p	0.424896012	11	Very High	BCmicrO|DIANA|ElMMo3|microrna.org|MirAncesTar|MirMAP|miRTar2GO|Mirza-G|RepTar|RNAhybrid|TargetRank
RBM33	Q96EV2		hsa-miR-28-5p	0.424692761	14	Very High	BCmicrO|BiTargeting|DIANA|ElMMo3|MBStar|MirAncesTar|miRDB|MirMAP|miRTar2GO|Mirza-G|MultiMiTar|RepTar|RNAhybrid|TargetSpy
HYOU1	Q9Y4L1		hsa-miR-28-5p	0.424450543	14	Very High	BCmicrO|BiTargeting|CoMeTa|ElMMo3|microrna.org|MirAncesTar|miRDB|MirMAP|MirSNP|miRTar2GO|Mirza-G|PITA|RepTar|RNAhybrid
EIF4A1	P60842		hsa-miR-28-5p	0.424032346	12	Very High	BCmicrO|CoMeTa|ElMMo3|microrna.org|MirAncesTar|mirbase|miRDB|MirMAP|MirSNP|miRTar2GO|RepTar|RNAhybrid
IGF1R	P08069		hsa-miR-28-5p	0.423890972	11	Very High	BCmicrO|DIANA|ElMMo3|MBStar|MirAncesTar|MirMAP|miRTar2GO|MultiMiTar|RepTar|RNAhybrid|TargetRank
TRIM27	P14373		hsa-miR-28-5p	0.423476867	12	Very High	BCmicrO|BiTargeting|CoMeTa|DIANA|ElMMo3|MBStar|microrna.org|MirAncesTar|MirMAP|miRTar2GO|RepTar|RNAhybrid
TIMELESS	Q9UNS1		hsa-miR-28-5p	0.423397291	15	Very High	BCmicrO|BiTargeting|CoMeTa|DIANA|ElMMo3|MBStar|microrna.org|MirAncesTar|mirbase|miRDB|MirMAP|MirTar|Mirza-G|RepTar|RNAhybrid
DDTL	A6NHG4		hsa-miR-28-5p	0.423391508	10	Very High	BCmicrO|DIANA|ElMMo3|microrna.org|MirAncesTar|MirMAP|Mirza-G|RepTar|TargetScan|TargetSpy
ABCC5	O15440		hsa-miR-28-5p	0.423091528	10	Very High	BCmicrO|BiTargeting|DIANA|MBStar|microrna.org|MirAncesTar|MirMAP|miRTar2GO|MultiMiTar|RNAhybrid
SMC1A	Q14683		hsa-miR-28-5p	0.422843446	13	Very High	BCmicrO|BiTargeting|CoMeTa|DIANA|ElMMo3|MBStar|MirAncesTar|miRDB|MirMAP|miRTar2GO|RepTar|RNAhybrid|TargetSpy
CDH18	Q13634		hsa-miR-28-5p	0.422790235	13	Very High	BCmicrO|BiTargeting|CoMeTa|DIANA|ElMMo3|MBStar|microrna.org|MirAncesTar|miRDB|MirMAP|MultiMiTar|PACCMIT|RNAhybrid
AP2B1	P63010		hsa-miR-28-5p	0.422327083	14	Very High	BCmicrO|BiTargeting|DIANA|ElMMo3|microrna.org|MirAncesTar|miRDB|MirMAP|MirTar|miRTar2GO|PITA|RepTar|RNAhybrid|TargetSpy
COL17A1	Q9UMD9		hsa-miR-28-5p	0.422273645	14	Very High	BCmicrO|BiTargeting|DIANA|ElMMo3|MAMI|microrna.org|MirAncesTar|miRDB|MirMAP|MirSNP|Mirza-G|PACCMIT|RepTar|RNAhybrid
FAM217B	Q9NTX9		hsa-miR-28-5p	0.422073521	10	Very High	BCmicrO|BiTargeting|DIANA|ElMMo3|MBStar|MirAncesTar|MirMAP|Mirza-G|RepTar|TargetScan
SYTL4	Q96C24		hsa-miR-28-5p	0.421836426	14	Very High	BCmicrO|BiTargeting|ElMMo3|MBStar|MAMI|microrna.org|MirAncesTar|mirbase|miRDB|MirMAP|miRTar2GO|Mirza-G|RepTar|RNAhybrid
ELAVL1	Q15717		hsa-miR-28-5p	0.421666027	12	Very High	BCmicrO|BiTargeting|CoMeTa|ElMMo3|MirAncesTar|mirbase|miRDB|MirMAP|miRTar2GO|MultiMiTar|RepTar|RNAhybrid
AP1G1	O43747		hsa-miR-28-5p	0.421511046	10	Very High	BCmicrO|CoMeTa|DIANA|MBStar|MirAncesTar|MirMAP|miRTar2GO|MultiMiTar|RepTar|RNAhybrid
SMAP2	Q8WU79		hsa-miR-28-5p	0.421229816	13	Very High	BCmicrO|DIANA|ElMMo3|microrna.org|MirAncesTar|miRDB|MirMAP|miRTar2GO|Mirza-G|MultiMiTar|RepTar|RNAhybrid|TargetSpy
OTULIN	Q96BN8		hsa-miR-28-5p	0.42103182	15	Very High	BCmicrO|DIANA|ElMMo3|MBStar|MirAncesTar|mirbase|miRDB|MirMAP|MirSNP|miRTar2GO|Mirza-G|PITA|RepTar|RNAhybrid|TargetSpy
SIRT2	Q8IXJ6		hsa-miR-28-5p	0.42080788	13	Very High	BCmicrO|BiTargeting|CoMeTa|DIANA|ElMMo3|MAMI|microrna.org|MirAncesTar|mirbase|miRDB|MirMAP|RepTar|RNAhybrid
NAP1L1	P55209		hsa-miR-28-5p	0.420639293	10	Very High	BCmicrO|BiTargeting|Cupid|MBStar|MirAncesTar|MirMAP|miRTar2GO|MultiMiTar|RepTar|RNAhybrid
WNK3	Q9BYP7		hsa-miR-28-5p	0.420609773	12	Very High	BCmicrO|Cupid|DIANA|ElMMo3|MBStar|MirAncesTar|miRDB|MirMAP|MirTar|Mirza-G|MultiMiTar|RepTar
MAGI1	Q96QZ7		hsa-miR-28-5p	0.420489024	12	Very High	BCmicrO|CoMeTa|DIANA|ElMMo3|MBStar|microrna.org|MirAncesTar|miRTar2GO|Mirza-G|MultiMiTar|RepTar|RNAhybrid
ITGA5	P08648		hsa-miR-28-5p	0.419870741	12	Very High	BCmicrO|CoMeTa|Cupid|DIANA|ElMMo3|microrna.org|MirAncesTar|miRDB|MirMAP|MirSNP|MultiMiTar|RNAhybrid
ZNF436	Q9C0F3		hsa-miR-28-5p	0.4194971	14	Very High	BCmicrO|DIANA|ElMMo3|MBStar|microrna.org|MirAncesTar|miRDB|MirMAP|miRTar2GO|Mirza-G|RepTar|RNA22|RNAhybrid|TargetSpy
LDOC1	O95751		hsa-miR-28-5p	0.419317907	13	Very High	BCmicrO|CoMeTa|DIANA|ElMMo3|MBStar|microrna.org|MirAncesTar|miRDB|MirMAP|miRTar2GO|Mirza-G|RepTar|RNAhybrid
N4BP3	O15049		hsa-miR-28-5p	0.418974864	11	Very High	BCmicrO|CoMeTa|DIANA|ElMMo3|MBStar|MirAncesTar|miRDB|MirMAP|MirSNP|MultiMiTar|RepTar
SSC4D	Q8WTU2		hsa-miR-28-5p	0.417995404	13	Very High	BCmicrO|DIANA|ElMMo3|MBStar|microrna.org|MirAncesTar|mirbase|miRDB|MirMAP|Mirza-G|RepTar|TargetRank|TargetSpy
XAF1	Q6GPH4		hsa-miR-28-5p	0.417709434	13	Very High	BCmicrO|DIANA|ElMMo3|microrna.org|MirAncesTar|miRDB|MirMAP|MirTar|Mirza-G|RepTar|RNAhybrid|TargetRank|TargetSpy
ABLIM1	O14639		hsa-miR-28-5p	0.417367184	15	Very High	BCmicrO|BiTargeting|DIANA|ElMMo3|MBStar|MirAncesTar|miRDB|MirMAP|miRTar2GO|Mirza-G|PACCMIT|PITA|RepTar|RNAhybrid|TargetSpy
SORT1	Q99523		hsa-miR-28-5p	0.417098918	13	Very High	BCmicrO|CoMeTa|DIANA|ElMMo3|MBStar|MirAncesTar|miRDB|MirMAP|miRTar2GO|Mirza-G|PITA|RepTar|RNA22
TMPRSS11D	O60235		hsa-miR-28-5p	0.416947716	12	Very High	BCmicrO|CoMeTa|DIANA|ElMMo3|microrna.org|MirAncesTar|miRDB|MirMAP|Mirza-G|PITA|RepTar|RNAhybrid
NDRG2	Q9UN36		hsa-miR-28-5p	0.416523411	12	Very High	BCmicrO|CoMeTa|DIANA|ElMMo3|microrna.org|MirAncesTar|miRDB|MirMAP|Mirza-G|MultiMiTar|PACCMIT|RNAhybrid
SRPRB	Q9Y5M8		hsa-miR-28-5p	0.416344329	14	Very High	BCmicrO|BiTargeting|CoMeTa|DIANA|ElMMo3|MBStar|microrna.org|MirAncesTar|miRDB|MirMAP|miRTar2GO|Mirza-G|RepTar|RNAhybrid
CHTF8	P0CG12		hsa-miR-28-5p	0.416073032	11	Very High	BCmicrO|DIANA|ElMMo3|microrna.org|MirAncesTar|miRDB|MirMAP|miRTar2GO|MultiMiTar|RepTar|RNAhybrid
SMAD3	P84022		hsa-miR-28-5p	0.41547983	12	Very High	BCmicrO|DIANA|ElMMo3|MBStar|MirAncesTar|miRDB|MirMAP|miRTar2GO|MultiMiTar|PACCMIT|RNAhybrid|TargetSpy
SZRD1	Q7Z422		hsa-miR-28-5p	0.414589793	13	Very High	BCmicrO|BiTargeting|CoMeTa|DIANA|ElMMo3|MBStar|MirAncesTar|miRDB|MirMAP|miRTar2GO|RNA22|RNAhybrid|TargetScan
DCHS1	Q96JQ0		hsa-miR-28-5p	0.414295105	14	Very High	BCmicrO|CoMeTa|DIANA|ElMMo3|microrna.org|MirAncesTar|mirbase|miRDB|MirMAP|MirSNP|Mirza-G|MultiMiTar|RepTar|RNAhybrid
LMCD1	Q9NZU5		hsa-miR-28-5p	0.414158033	14	Very High	BCmicrO|BiTargeting|CoMeTa|DIANA|ElMMo3|MAMI|MirAncesTar|mirbase|MirMAP|Mirza-G|PITA|RepTar|RNAhybrid|TargetSpy
SLC13A5	Q86YT5		hsa-miR-28-5p	0.413968995	13	Very High	BCmicrO|BiTargeting|DIANA|ElMMo3|microrna.org|MirAncesTar|miRDB|MirMAP|MirTar|Mirza-G|PACCMIT|RepTar|RNAhybrid
LDLRAD2	Q5SZI1		hsa-miR-28-5p	0.413851181	12	Very High	BCmicrO|DIANA|ElMMo3|MBStar|MirAncesTar|miRDB|MirMAP|MultiMiTar|RepTar|RNA22|RNAhybrid|TargetScan
MAFF	Q9ULX9		hsa-miR-28-5p	0.413384944	14	Very High	BCmicrO|BiTargeting|CoMeTa|DIANA|ElMMo3|MBStar|microrna.org|MirAncesTar|miRDB|MirMAP|Mirza-G|MultiMiTar|RepTar|RNAhybrid
GRM1	Q13255		hsa-miR-28-5p	0.41308064	12	Very High	BCmicrO|BiTargeting|CoMeTa|DIANA|ElMMo3|microrna.org|MirAncesTar|MirMAP|MirSNP|MultiMiTar|RepTar|RNAhybrid
EHF	Q9NZC4		hsa-miR-28-5p	0.412994173	15	Very High	BCmicrO|BiTargeting|CoMeTa|DIANA|ElMMo3|MBStar|microrna.org|MirAncesTar|miRDB|MirMAP|Mirza-G|PITA|RepTar|RNAhybrid|TargetSpy
PPP1R16B	Q96T49		hsa-miR-28-5p	0.412706287	13	Very High	BCmicrO|BiTargeting|CoMeTa|DIANA|ElMMo3|MBStar|MirAncesTar|miRDB|MirMAP|MirSNP|RepTar|TargetRank|TargetSpy
SYBU	Q9NX95		hsa-miR-28-5p	0.412563582	13	Very High	BCmicrO|BiTargeting|DIANA|ElMMo3|MBStar|microrna.org|MirAncesTar|MirMAP|miRTar2GO|MultiMiTar|RepTar|RNAhybrid|TargetSpy
FRS2	Q8WU20		hsa-miR-28-5p	0.412405129	11	Very High	BCmicrO|CoMeTa|DIANA|ElMMo3|MirAncesTar|miRDB|MirMAP|miRTar2GO|Mirza-G|MultiMiTar|RepTar
DDX4	Q9NQI0		hsa-miR-28-5p	0.41235184	12	Very High	BCmicrO|CoMeTa|ElMMo3|MBStar|microrna.org|MirAncesTar|mirbase|MirMAP|Mirza-G|RepTar|RNAhybrid|TargetSpy
CHP1	Q99653		hsa-miR-28-5p	0.411988354	11	Very High	BCmicrO|BiTargeting|CoMeTa|DIANA|MirAncesTar|MirMAP|miRTar2GO|Mirza-G|MultiMiTar|RepTar|RNAhybrid
CBX5	P45973		hsa-miR-28-5p	0.411806074	12	Very High	BCmicrO|BiTargeting|DIANA|ElMMo3|MBStar|MirAncesTar|miRDB|MirMAP|miRTar2GO|Mirza-G|RNAhybrid|TargetScan
RAB15	P59190		hsa-miR-28-5p	0.411745317	14	Very High	BCmicrO|BiTargeting|DIANA|ElMMo3|MBStar|microrna.org|MirAncesTar|miRDB|MirMAP|MirSNP|Mirza-G|RepTar|RNAhybrid|TargetRank
SGCD	Q92629		hsa-miR-28-5p	0.411706033	13	Very High	BCmicrO|BiTargeting|CoMeTa|DIANA|ElMMo3|MBStar|MirAncesTar|miRDB|MirMAP|MultiMiTar|PITA|RepTar|RNAhybrid
RNASEL	Q05823		hsa-miR-28-5p	0.411510862	13	Very High	BCmicrO|BiTargeting|CoMeTa|ElMMo3|MBStar|MAMI|MirAncesTar|MirMAP|miRTar2GO|PITA|RepTar|RNA22|RNAhybrid
KCNJ1	P48048		hsa-miR-28-5p	0.411098032	12	Very High	BCmicrO|DIANA|ElMMo3|MBStar|microrna.org|MirAncesTar|miRDB|MirMAP|MirTar|RepTar|RNAhybrid|TargetRank
CHRNB2	P17787		hsa-miR-28-5p	0.410799133	15	Very High	BCmicrO|BiTargeting|DIANA|ElMMo3|MirAncesTar|miRDB|MirMAP|MirSNP|MirTar|Mirza-G|PACCMIT|RepTar|RNA22|RNAhybrid|TargetSpy
BSN	Q9UPA5		hsa-miR-28-5p	0.410702578	11	Very High	BCmicrO|CoMeTa|DIANA|ElMMo3|MirAncesTar|miRDB|MirMAP|Mirza-G|RepTar|TargetScan|TargetSpy
CNTNAP1	P78357		hsa-miR-28-5p	0.410315124	13	Very High	BCmicrO|BiTargeting|CoMeTa|DIANA|ElMMo3|MirAncesTar|miRDB|MirMAP|miRTar2GO|MultiMiTar|RepTar|RNAhybrid|TargetSpy
CD3G	P09693		hsa-miR-28-5p	0.410228121	13	Very High	BCmicrO|CoMeTa|DIANA|ElMMo3|MBStar|microrna.org|MirAncesTar|mirbase|miRDB|MirMAP|Mirza-G|RepTar|RNAhybrid
HMG20A	Q9NP66		hsa-miR-28-5p	0.409972557	10	Very High	BCmicrO|CoMeTa|DIANA|MBStar|MirAncesTar|MirMAP|miRTar2GO|MultiMiTar|RepTar|RNAhybrid
HDGF	P51858		hsa-miR-28-5p	0.409621502	12	Very High	BCmicrO|BiTargeting|DIANA|ElMMo3|MirAncesTar|miRDB|MirMAP|miRTar2GO|MultiMiTar|RepTar|RNA22|RNAhybrid
CACNA1G	O43497		hsa-miR-28-5p	0.409587378	11	Very High	BCmicrO|CoMeTa|ElMMo3|MBStar|microrna.org|MirAncesTar|mirbase|miRDB|MirMAP|MultiMiTar|RNAhybrid
RAB2B	Q8WUD1		hsa-miR-28-5p	0.409573911	15	Very High	BCmicrO|BiTargeting|DIANA|ElMMo3|MBStar|microrna.org|MirAncesTar|mirbase|miRDB|MirMAP|Mirza-G|MultiMiTar|PITA|RepTar|RNAhybrid
MIEN1	Q9BRT3		hsa-miR-28-5p	0.409435886	13	Very High	BCmicrO|DIANA|ElMMo3|MBStar|MAMI|microrna.org|MirAncesTar|mirbase|miRDB|MirMAP|Mirza-G|RepTar|RNAhybrid
COA7	Q96BR5		hsa-miR-28-5p	0.409407618	11	Very High	BCmicrO|BiTargeting|DIANA|ElMMo3|MAMI|MirAncesTar|mirbase|miRDB|MirMAP|RepTar|RNA22
SNX13	Q9Y5W8		hsa-miR-28-5p	0.409064538	10	Very High	BCmicrO|BiTargeting|CoMeTa|DIANA|microrna.org|MirAncesTar|MirMAP|MultiMiTar|RepTar|RNAhybrid
VOPP1	Q96AW1		hsa-miR-28-5p	0.409048816	14	Very High	BCmicrO|CoMeTa|DIANA|ElMMo3|MBStar|microrna.org|MirAncesTar|miRDB|MirMAP|miRTar2GO|Mirza-G|PITA|RepTar|RNAhybrid
IRF2BPL	Q9H1B7		hsa-miR-28-5p	0.408569132	11	Very High	BCmicrO|Cupid|DIANA|ElMMo3|microrna.org|MirAncesTar|miRDB|MirMAP|miRTar2GO|PITA|RepTar
FAM91A1	Q658Y4		hsa-miR-28-5p	0.408112478	13	Very High	BCmicrO|DIANA|ElMMo3|microrna.org|MirAncesTar|miRDB|MirMAP|miRTar2GO|Mirza-G|PITA|RepTar|RNAhybrid|TargetSpy
OTUD7B	Q6GQQ9		hsa-miR-28-5p	0.407980005	13	Very High	BCmicrO|BiTargeting|CoMeTa|DIANA|ElMMo3|MBStar|MirAncesTar|miRDB|MirMAP|miRTar2GO|MultiMiTar|RepTar|RNA22
XK	P51811		hsa-miR-28-5p	0.407888753	12	Very High	BCmicrO|DIANA|ElMMo3|MBStar|microrna.org|MirAncesTar|miRDB|MirMAP|Mirza-G|RepTar|TargetRank|TargetSpy
OLFM4	Q6UX06		hsa-miR-28-5p	0.40772179	14	Very High	BCmicrO|BiTargeting|CoMeTa|ElMMo3|MAMI|microrna.org|MirAncesTar|mirbase|miRDB|MirMAP|Mirza-G|PITA|RepTar|RNAhybrid
KCTD15	Q96SI1		hsa-miR-28-5p	0.407511314	12	Very High	BCmicrO|DIANA|ElMMo3|MBStar|microrna.org|MirAncesTar|MirMAP|miRTar2GO|MultiMiTar|RepTar|RNAhybrid|TargetSpy
POU6F2	P78424		hsa-miR-28-5p	0.40735992	7	Very High	BCmicrO|BiTargeting|DIANA|microrna.org|MirMAP|RNAhybrid|TargetScan
CXCL5	P42830		hsa-miR-28-5p	0.40705786	12	Very High	BCmicrO|CoMeTa|DIANA|ElMMo3|MBStar|microrna.org|MirAncesTar|miRDB|MirMAP|Mirza-G|RepTar|TargetRank
COMMD9	Q9P000		hsa-miR-28-5p	0.406981652	14	Very High	BCmicrO|DIANA|ElMMo3|MBStar|microrna.org|MirAncesTar|miRDB|MirMAP|MirTar|miRTar2GO|Mirza-G|RepTar|RNAhybrid|TargetSpy
FNDC7	Q5VTL7		hsa-miR-28-5p	0.406520621	14	Very High	BCmicrO|BiTargeting|DIANA|ElMMo3|microrna.org|MirAncesTar|miRDB|MirMAP|MirTar|Mirza-G|PACCMIT|RepTar|RNA22|RNAhybrid
UBA6	A0AVT1		hsa-miR-28-5p	0.406365264	15	Very High	BCmicrO|BiTargeting|CoMeTa|DIANA|ElMMo3|MBStar|microrna.org|MirAncesTar|miRDB|MirMAP|MirSNP|Mirza-G|RepTar|RNAhybrid|TargetSpy
PTPRR	Q15256		hsa-miR-28-5p	0.406074855	15	Very High	BCmicrO|CoMeTa|DIANA|ElMMo3|MBStar|microrna.org|MirAncesTar|mirbase|miRDB|MirMAP|Mirza-G|PITA|RepTar|RNAhybrid|TargetSpy
TFRC	P02786		hsa-miR-28-5p	0.40603847	13	Very High	BCmicrO|BiTargeting|CoMeTa|DIANA|ElMMo3|MBStar|microrna.org|MirAncesTar|miRDB|MirMAP|miRTar2GO|Mirza-G|RNAhybrid
SLC35C1	Q96A29		hsa-miR-28-5p	0.405762218	13	Very High	BCmicrO|DIANA|ElMMo3|microrna.org|MirAncesTar|miRDB|MirMAP|MirSNP|miRTar2GO|Mirza-G|RepTar|RNAhybrid|TargetSpy
IER3IP1	Q9Y5U9		hsa-miR-28-5p	0.405697062	11	Very High	BCmicrO|DIANA|ElMMo3|microrna.org|MirAncesTar|miRDB|MirMAP|MirTar|Mirza-G|RepTar|TargetRank
SH3BGRL	O75368		hsa-miR-28-5p	0.405652408	9	Very High	BCmicrO|BiTargeting|CoMeTa|MBStar|microrna.org|MirAncesTar|miRTar2GO|RepTar|RNAhybrid
ETNK1	Q9HBU6		hsa-miR-28-5p	0.405625896	11	Very High	BCmicrO|CoMeTa|ElMMo3|MBStar|MirAncesTar|miRDB|miRTar2GO|RepTar|RNAhybrid|TargetRank|TargetSpy
BRWD1	Q9NSI6		hsa-miR-28-5p	0.405546827	12	Very High	BCmicrO|BiTargeting|CoMeTa|ElMMo3|MBStar|MirAncesTar|MirMAP|miRTar2GO|MultiMiTar|PITA|RepTar|RNAhybrid
MTF1	Q14872		hsa-miR-28-5p	0.40549538	12	Very High	BCmicrO|CoMeTa|ElMMo3|MBStar|microrna.org|MirAncesTar|miRDB|MirMAP|miRTar2GO|RepTar|RNA22|TargetSpy
CDSN	Q15517		hsa-miR-28-5p	0.405364178	16	Very High	BCmicrO|BiTargeting|DIANA|ElMMo3|microrna.org|MirAncesTar|mirbase|miRDB|MirMAP|MirSNP|MirTar|Mirza-G|PITA|RepTar|RNAhybrid|TargetSpy
N4BP2L1	Q5TBK1		hsa-miR-28-5p	0.40531712	13	Very High	BCmicrO|BiTargeting|CoMeTa|DIANA|ElMMo3|MBStar|microrna.org|MirAncesTar|miRDB|MirMAP|Mirza-G|MultiMiTar|RNAhybrid
SLC9A1	P19634		hsa-miR-28-5p	0.405254969	13	Very High	BCmicrO|CoMeTa|DIANA|ElMMo3|MBStar|MirAncesTar|miRDB|MirMAP|miRTar2GO|MultiMiTar|RepTar|RNA22|RNAhybrid
NREP	Q16612		hsa-miR-28-5p	0.40516375	12	Very High	BCmicrO|BiTargeting|DIANA|ElMMo3|MBStar|MirAncesTar|MirMAP|miRTar2GO|MultiMiTar|PITA|RNAhybrid|TargetSpy
LRRC59	Q96AG4		hsa-miR-28-5p	0.405015248	12	Very High	BCmicrO|BiTargeting|DIANA|ElMMo3|MirAncesTar|miRDB|MirMAP|miRTar2GO|Mirza-G|RepTar|RNAhybrid|TargetRank
HHAT	Q5VTY9		hsa-miR-28-5p	0.404654795	15	Very High	BCmicrO|BiTargeting|DIANA|ElMMo3|MBStar|microrna.org|MirAncesTar|mirbase|miRDB|MirMAP|Mirza-G|RepTar|RNA22|RNAhybrid|TargetRank
RBFOX2	O43251		hsa-miR-28-5p	0.404602989	12	Very High	BCmicrO|BiTargeting|DIANA|ElMMo3|MBStar|MirAncesTar|MirMAP|miRTar2GO|MultiMiTar|PITA|RepTar|RNAhybrid
PPIF	P30405		hsa-miR-28-5p	0.40418182	14	Very High	BCmicrO|BiTargeting|DIANA|ElMMo3|microrna.org|MirAncesTar|mirbase|miRDB|MirMAP|miRTar2GO|Mirza-G|PITA|RepTar|RNAhybrid
C14orf105	Q9NVL8		hsa-miR-28-5p	0.404172459	15	Very High	BCmicrO|BiTargeting|DIANA|ElMMo3|MBStar|microrna.org|MirAncesTar|mirbase|miRDB|MirMAP|MirTar|Mirza-G|PITA|RepTar|RNAhybrid
UBE2H	P62256		hsa-miR-28-5p	0.40387653	13	Very High	BCmicrO|BiTargeting|DIANA|ElMMo3|MBStar|MirAncesTar|miRDB|MirMAP|MirSNP|miRTar2GO|Mirza-G|MultiMiTar|RNAhybrid
ATF2	P15336		hsa-miR-28-5p	0.403017628	7	Very High	BCmicrO|BiTargeting|MBStar|MAMI|MirAncesTar|MirMAP|RNAhybrid
PALM2	Q8IXS6		hsa-miR-28-5p	0.402769218	13	Very High	BCmicrO|BiTargeting|DIANA|ElMMo3|MBStar|MirAncesTar|miRDB|MirMAP|Mirza-G|MultiMiTar|RepTar|RNAhybrid|TargetSpy
EIF4A2	Q14240		hsa-miR-28-5p	0.402308967	8	Very High	BCmicrO|BiTargeting|CoMeTa|MAMI|MirAncesTar|miRTar2GO|MultiMiTar|RNAhybrid
PPARA	Q07869		hsa-miR-28-5p	0.402074019	14	Very High	BCmicrO|BiTargeting|CoMeTa|DIANA|ElMMo3|MBStar|microrna.org|MirAncesTar|MirMAP|miRTar2GO|PITA|RepTar|RNAhybrid|TargetSpy
EPB41	P11171		hsa-miR-28-5p	0.401616914	11	Very High	BCmicrO|CoMeTa|DIANA|ElMMo3|MBStar|MirAncesTar|MirMAP|MultiMiTar|RepTar|RNA22|RNAhybrid
FAM60A	Q9NP50		hsa-miR-28-5p	0.401311775	14	Very High	BCmicrO|CoMeTa|DIANA|ElMMo3|MBStar|microrna.org|MirAncesTar|MirMAP|MirSNP|Mirza-G|PITA|RepTar|RNAhybrid|TargetSpy
R3HDM4	Q96D70		hsa-miR-28-5p	0.4009821	13	Very High	BCmicrO|BiTargeting|DIANA|ElMMo3|MAMI|microrna.org|MirAncesTar|miRDB|MirMAP|MirSNP|miRTar2GO|RepTar|RNAhybrid
KCNH1	O95259		hsa-miR-28-5p	0.400630403	12	Very High	BCmicrO|ElMMo3|MBStar|MirAncesTar|miRDB|MirSNP|miRTar2GO|Mirza-G|PITA|RNA22|TargetScan|TargetSpy
USP12	O75317		hsa-miR-28-5p	0.400286169	12	Very High	BCmicrO|CoMeTa|DIANA|ElMMo3|microrna.org|MirAncesTar|miRDB|MirMAP|Mirza-G|MultiMiTar|RepTar|RNAhybrid
LDB3	O75112		hsa-miR-28-5p	0.400210831	14	Very High	BCmicrO|BiTargeting|DIANA|ElMMo3|microrna.org|MirAncesTar|miRDB|MirMAP|MirSNP|Mirza-G|PITA|RepTar|RNAhybrid|TargetRank
ZNF518A	Q6AHZ1		hsa-miR-28-5p	0.399907266	12	Very High	BCmicrO|BiTargeting|ElMMo3|MBStar|microrna.org|MirAncesTar|miRDB|miRTar2GO|Mirza-G|RepTar|TargetRank|TargetSpy
RNASE3	P12724		hsa-miR-28-5p	0.399490077	13	Very High	BCmicrO|CoMeTa|DIANA|ElMMo3|microrna.org|MirAncesTar|mirbase|miRDB|MirMAP|MirSNP|PITA|RepTar|RNAhybrid
NCBP3	Q53F19		hsa-miR-28-5p	0.399365801	11	Very High	BCmicrO|DIANA|MBStar|microrna.org|MirAncesTar|miRDB|MirMAP|miRTar2GO|Mirza-G|RNAhybrid|TargetScan
CASQ2	O14958		hsa-miR-28-5p	0.399080664	12	Very High	BCmicrO|CoMeTa|DIANA|ElMMo3|MBStar|microrna.org|MirAncesTar|miRDB|MirMAP|Mirza-G|MultiMiTar|RepTar
SHB	Q15464		hsa-miR-28-5p	0.398763673	11	Very High	BCmicrO|CoMeTa|ElMMo3|MBStar|microrna.org|MirAncesTar|miRDB|MultiMiTar|RepTar|RNAhybrid|TargetSpy
CASZ1	Q86V15		hsa-miR-28-5p	0.398381374	13	Very High	BCmicrO|BiTargeting|CoMeTa|ElMMo3|MAMI|MirAncesTar|mirbase|MirMAP|Mirza-G|MultiMiTar|PITA|RNA22|RNAhybrid
MAZ	P56270		hsa-miR-28-5p	0.398375847	12	Very High	BCmicrO|CoMeTa|DIANA|ElMMo3|microrna.org|MirAncesTar|mirbase|miRDB|MirMAP|miRTar2GO|RepTar|RNAhybrid
SMIM19	Q96E16		hsa-miR-28-5p	0.398144678	13	Very High	BCmicrO|BiTargeting|DIANA|ElMMo3|microrna.org|MirAncesTar|mirbase|miRDB|MirMAP|RepTar|RNAhybrid|TargetRank|TargetSpy
TNFSF12	O43508		hsa-miR-28-5p	0.398130642	13	Very High	BCmicrO|CoMeTa|DIANA|ElMMo3|MBStar|microrna.org|MirAncesTar|miRDB|MirMAP|Mirza-G|RepTar|RNAhybrid|TargetRank
GLCCI1	Q86VQ1		hsa-miR-28-5p	0.398124159	10	Very High	BCmicrO|Cupid|DIANA|ElMMo3|MBStar|MirAncesTar|MirMAP|miRTar2GO|MultiMiTar|RNAhybrid
ALDH5A1	P51649		hsa-miR-28-5p	0.397952299	14	Very High	BCmicrO|BiTargeting|DIANA|ElMMo3|MBStar|microrna.org|MirAncesTar|miRDB|MirMAP|Mirza-G|RepTar|RNAhybrid|TargetRank|TargetSpy
NXF1	Q9UBU9		hsa-miR-28-5p	0.397933517	11	Very High	BCmicrO|BiTargeting|CoMeTa|Cupid|DIANA|ElMMo3|MirAncesTar|MirMAP|RepTar|RNAhybrid|TargetScan
MLLT6	P55198		hsa-miR-28-5p	0.397839541	11	Very High	BCmicrO|BiTargeting|DIANA|ElMMo3|MirAncesTar|MirMAP|MirSNP|miRTar2GO|MultiMiTar|RepTar|RNAhybrid
SP1	P08047		hsa-miR-28-5p	0.397829381	9	Very High	BCmicrO|DIANA|ElMMo3|MBStar|microrna.org|MirAncesTar|MirMAP|miRTar2GO|MultiMiTar
PTPN3	P26045		hsa-miR-28-5p	0.397762149	12	Very High	BCmicrO|DIANA|ElMMo3|MBStar|microrna.org|MirAncesTar|miRDB|MirMAP|miRTar2GO|Mirza-G|MultiMiTar|RepTar
TMCO6	Q96DC7		hsa-miR-28-5p	0.397675944	12	Very High	BCmicrO|BiTargeting|ElMMo3|MAMI|microrna.org|MirAncesTar|mirbase|miRDB|MirMAP|miRTar2GO|RepTar|RNAhybrid
PGAM1	P18669		hsa-miR-28-5p	0.397411412	14	Very High	BCmicrO|CoMeTa|DIANA|ElMMo3|microrna.org|MirAncesTar|mirbase|miRDB|MirMAP|Mirza-G|PITA|RepTar|RNAhybrid|TargetSpy
KIF3C	O14782		hsa-miR-28-5p	0.397032066	12	Very High	BCmicrO|BiTargeting|CoMeTa|DIANA|ElMMo3|MirAncesTar|miRDB|MirMAP|Mirza-G|MultiMiTar|RepTar|RNAhybrid
DDX56	Q9NY93		hsa-miR-28-5p	0.396965143	12	Very High	BCmicrO|BiTargeting|DIANA|ElMMo3|MAMI|microrna.org|MirAncesTar|mirbase|miRDB|MirMAP|miRTar2GO|RNAhybrid
RBM14	Q96PK6		hsa-miR-28-5p	0.396904098	12	Very High	BCmicrO|CoMeTa|DIANA|ElMMo3|MBStar|MirAncesTar|MirMAP|miRTar2GO|MultiMiTar|PITA|RepTar|RNAhybrid
OAS2	P29728		hsa-miR-28-5p	0.39680862	14	Very High	BCmicrO|BiTargeting|DIANA|ElMMo3|MBStar|microrna.org|MirAncesTar|miRDB|MirMAP|MirSNP|Mirza-G|RepTar|RNAhybrid|TargetSpy
ARPP19	P56211		hsa-miR-28-5p	0.396567606	11	Very High	BCmicrO|BiTargeting|DIANA|ElMMo3|MBStar|MirAncesTar|MirMAP|miRTar2GO|MultiMiTar|RepTar|RNAhybrid
VPS13A	Q96RL7		hsa-miR-28-5p	0.396015832	13	Very High	BCmicrO|DIANA|ElMMo3|MBStar|microrna.org|MirAncesTar|miRDB|MirMAP|PITA|RepTar|RNAhybrid|TargetRank|TargetSpy
PAG1	Q9NWQ8		hsa-miR-28-5p	0.395737592	10	Very High	BCmicrO|BiTargeting|DIANA|ElMMo3|MirAncesTar|miRDB|MirMAP|Mirza-G|MultiMiTar|RepTar
RREB1	Q92766		hsa-miR-28-5p	0.395429404	13	Very High	BCmicrO|BiTargeting|CoMeTa|DIANA|ElMMo3|MBStar|MirAncesTar|miRDB|MirMAP|miRTar2GO|MultiMiTar|RepTar|RNAhybrid
UBFD1	O14562		hsa-miR-28-5p	0.395221803	12	Very High	BCmicrO|DIANA|ElMMo3|MBStar|MirAncesTar|MirMAP|MirSNP|miRTar2GO|MultiMiTar|PITA|RepTar|RNAhybrid
CCL19	Q99731		hsa-miR-28-5p	0.395186662	12	Very High	BCmicrO|CoMeTa|ElMMo3|MAMI|microrna.org|MirAncesTar|mirbase|miRDB|MirMAP|MirSNP|RepTar|RNAhybrid
FEV	Q99581		hsa-miR-28-5p	0.395093194	11	Very High	BCmicrO|DIANA|ElMMo3|microrna.org|MirAncesTar|miRDB|MirMAP|MirTar|RepTar|TargetRank|TargetSpy
SLC39A14	Q15043		hsa-miR-28-5p	0.394897694	12	Very High	BCmicrO|BiTargeting|DIANA|ElMMo3|microrna.org|MirAncesTar|miRDB|MirMAP|MirTar|MultiMiTar|RepTar|RNAhybrid
TRPC3	Q13507		hsa-miR-28-5p	0.394491218	10	Very High	BCmicrO|BiTargeting|CoMeTa|MBStar|MAMI|microrna.org|MirAncesTar|mirbase|MultiMiTar|RNAhybrid
ZNF10	P21506		hsa-miR-28-5p	0.394459577	12	Very High	BCmicrO|BiTargeting|CoMeTa|DIANA|ElMMo3|microrna.org|MirAncesTar|miRDB|MirMAP|miRTar2GO|Mirza-G|RepTar
RAB30	Q15771		hsa-miR-28-5p	0.394402895	11	Very High	BCmicrO|BiTargeting|CoMeTa|DIANA|microrna.org|MirAncesTar|miRDB|MirMAP|miRTar2GO|RepTar|RNAhybrid
KCTD2	Q14681		hsa-miR-28-5p	0.394378807	12	Very High	BCmicrO|BiTargeting|DIANA|ElMMo3|MirAncesTar|miRDB|MirMAP|MirSNP|miRTar2GO|RepTar|RNAhybrid|TargetRank
EDEM1	Q92611		hsa-miR-28-5p	0.394351191	14	Very High	BCmicrO|BiTargeting|CoMeTa|DIANA|ElMMo3|microrna.org|MirAncesTar|miRDB|MirMAP|miRTar2GO|Mirza-G|PITA|RepTar|RNAhybrid
APOA5	Q6Q788		hsa-miR-28-5p	0.394141525	13	Very High	BCmicrO|BiTargeting|DIANA|ElMMo3|microrna.org|MirAncesTar|mirbase|miRDB|MirMAP|MirSNP|Mirza-G|RepTar|RNAhybrid
PHC3	Q8NDX5		hsa-miR-28-5p	0.394095212	11	Very High	BCmicrO|ElMMo3|MBStar|MirAncesTar|MirMAP|miRTar2GO|MultiMiTar|PITA|RepTar|RNAhybrid|TargetSpy
FCHSD2	O94868		hsa-miR-28-5p	0.393941799	12	Very High	BCmicrO|BiTargeting|CoMeTa|DIANA|microrna.org|MirAncesTar|MirMAP|miRTar2GO|MultiMiTar|PITA|RepTar|RNAhybrid
MANEAL	Q5VSG8		hsa-miR-28-5p	0.393835438	16	Very High	BCmicrO|DIANA|ElMMo3|MBStar|microrna.org|MirAncesTar|miRDB|MirMAP|MirSNP|miRTar2GO|Mirza-G|PITA|RepTar|RNA22|RNAhybrid|TargetSpy
MAP1A	P78559		hsa-miR-28-5p	0.3937053	12	Very High	BCmicrO|Cupid|DIANA|ElMMo3|microrna.org|MirAncesTar|miRDB|MirMAP|MultiMiTar|PITA|RepTar|RNAhybrid
PLEKHA2	Q9HB19		hsa-miR-28-5p	0.393669056	14	Very High	BCmicrO|BiTargeting|DIANA|ElMMo3|MBStar|microrna.org|MirAncesTar|miRDB|MirMAP|miRTar2GO|Mirza-G|RepTar|RNAhybrid|TargetSpy
ZNF614	Q8N883		hsa-miR-28-5p	0.393489361	14	Very High	BCmicrO|BiTargeting|DIANA|ElMMo3|microrna.org|MirAncesTar|mirbase|miRDB|MirMAP|Mirza-G|RepTar|RNAhybrid|TargetRank|TargetSpy
HEMK1	Q9Y5R4		hsa-miR-28-5p	0.39314017	12	Very High	BCmicrO|BiTargeting|DIANA|ElMMo3|MirAncesTar|MirMAP|miRTar2GO|MultiMiTar|PITA|RepTar|RNAhybrid|TargetSpy
RNASE2	P10153		hsa-miR-28-5p	0.392791639	13	Very High	BCmicrO|CoMeTa|DIANA|ElMMo3|microrna.org|MirAncesTar|mirbase|miRDB|MirMAP|MirSNP|PITA|RepTar|RNAhybrid
DCUN1D5	Q9BTE7		hsa-miR-28-5p	0.39251571	10	Very High	BCmicrO|ElMMo3|MBStar|MirAncesTar|miRDB|MirTar|miRTar2GO|Mirza-G|RNAhybrid|TargetScan
EGLN3	Q9H6Z9		hsa-miR-28-5p	0.392487443	10	Very High	BCmicrO|BiTargeting|CoMeTa|DIANA|microrna.org|MirAncesTar|MirMAP|miRTar2GO|RepTar|RNAhybrid
CEP170B	Q9Y4F5		hsa-miR-28-5p	0.392075634	13	Very High	BCmicrO|BiTargeting|DIANA|ElMMo3|microrna.org|MirAncesTar|miRDB|MirMAP|miRTar2GO|Mirza-G|PITA|RepTar|RNAhybrid
PVR	P15151		hsa-miR-28-5p	0.391867791	12	Very High	BCmicrO|BiTargeting|CoMeTa|DIANA|ElMMo3|MirAncesTar|miRDB|MirMAP|MirSNP|miRTar2GO|RepTar|RNAhybrid
ZNF462	Q96JM2		hsa-miR-28-5p	0.391030015	13	Very High	BCmicrO|BiTargeting|DIANA|ElMMo3|MBStar|microrna.org|MirAncesTar|mirbase|MirMAP|miRTar2GO|MultiMiTar|RNAhybrid|TargetSpy
SRSF5	Q13243		hsa-miR-28-5p	0.390971708	10	Very High	BCmicrO|BiTargeting|CoMeTa|microrna.org|MirAncesTar|MirMAP|miRTar2GO|MultiMiTar|RepTar|RNAhybrid
FLOT2	Q14254		hsa-miR-28-5p	0.390908245	11	Very High	BCmicrO|BiTargeting|CoMeTa|DIANA|MBStar|MirAncesTar|MirMAP|miRTar2GO|MultiMiTar|RepTar|RNAhybrid
PPP1R14D	Q9NXH3		hsa-miR-28-5p	0.390575979	11	Very High	BCmicrO|CoMeTa|DIANA|ElMMo3|microrna.org|MirAncesTar|mirbase|miRDB|MirMAP|RepTar|RNAhybrid
RPGRIP1L	Q68CZ1		hsa-miR-28-5p	0.390115304	11	Very High	BCmicrO|CoMeTa|Cupid|DIANA|microrna.org|MirAncesTar|MirMAP|Mirza-G|MultiMiTar|RepTar|RNAhybrid
STC1	P52823		hsa-miR-28-5p	0.390042532	11	Very High	BCmicrO|Cupid|DIANA|ElMMo3|microrna.org|MirAncesTar|MirMAP|MultiMiTar|PITA|RNAhybrid|TargetSpy
TFDP2	Q14188		hsa-miR-28-5p	0.38995694	13	Very High	BCmicrO|BiTargeting|CoMeTa|DIANA|ElMMo3|MBStar|MirAncesTar|miRDB|MirMAP|MirSNP|MirTar|Mirza-G|RNAhybrid
DNMBP	Q6XZF7		hsa-miR-28-5p	0.389840942	13	Very High	BCmicrO|DIANA|ElMMo3|MBStar|microrna.org|MirAncesTar|miRDB|MirMAP|miRTar2GO|PACCMIT|RepTar|RNAhybrid|TargetSpy
AMOTL2	Q9Y2J4		hsa-miR-28-5p	0.389611302	11	Very High	BCmicrO|BiTargeting|CoMeTa|DIANA|ElMMo3|MirAncesTar|miRDB|MirMAP|MultiMiTar|PACCMIT|RNAhybrid
MAPK1	P28482		hsa-miR-28-5p	0.389352685	12	Very High	BCmicrO|BiTargeting|ElMMo3|MBStar|microrna.org|MirAncesTar|miRDB|MirMAP|MirSNP|Mirza-G|PITA|RepTar
CTDSPL	O15194		hsa-miR-28-5p	0.389248567	12	Very High	BCmicrO|BiTargeting|CoMeTa|DIANA|ElMMo3|MBStar|MirAncesTar|miRDB|MirMAP|RepTar|RNAhybrid|TargetRank
CPSF2	Q9P2I0		hsa-miR-28-5p	0.389027125	12	Very High	BCmicrO|DIANA|ElMMo3|microrna.org|MirAncesTar|miRDB|MirMAP|Mirza-G|RepTar|RNAhybrid|TargetRank|TargetSpy
PPIE	Q9UNP9		hsa-miR-28-5p	0.38874354	13	Very High	BCmicrO|BiTargeting|CoMeTa|DIANA|ElMMo3|MBStar|MirAncesTar|miRDB|MirMAP|RepTar|RNA22|RNAhybrid|TargetScan
NDST1	P52848		hsa-miR-28-5p	0.388598531	10	Very High	BCmicrO|CoMeTa|DIANA|ElMMo3|MirAncesTar|MirMAP|MultiMiTar|RepTar|RNAhybrid|TargetRank
EPHA5	P54756		hsa-miR-28-5p	0.388585799	14	Very High	BCmicrO|BiTargeting|CoMeTa|DIANA|ElMMo3|MBStar|microrna.org|MirAncesTar|miRDB|MirMAP|miRTar2GO|Mirza-G|PITA|RNAhybrid
HIF3A	Q9Y2N7		hsa-miR-28-5p	0.388570867	14	Very High	BCmicrO|CoMeTa|DIANA|ElMMo3|MBStar|MirAncesTar|miRDB|MirMAP|Mirza-G|PITA|RepTar|RNAhybrid|TargetRank|TargetSpy
UBE3C	Q15386		hsa-miR-28-5p	0.388311307	13	Very High	BCmicrO|DIANA|ElMMo3|microrna.org|MirAncesTar|miRDB|MirMAP|MirSNP|MirTar|miRTar2GO|Mirza-G|RepTar|RNAhybrid
TBL1XR1	Q9BZK7		hsa-miR-28-5p	0.388269751	9	Very High	BCmicrO|BiTargeting|CoMeTa|DIANA|MBStar|MirAncesTar|miRTar2GO|MultiMiTar|RepTar
PAPOLA	P51003		hsa-miR-28-5p	0.388219216	13	Very High	BCmicrO|BiTargeting|ElMMo3|MBStar|microrna.org|MirAncesTar|mirbase|MirMAP|miRTar2GO|Mirza-G|PITA|RepTar|RNAhybrid
KDM3B	Q7LBC6		hsa-miR-28-5p	0.388003397	13	Very High	BCmicrO|BiTargeting|CoMeTa|DIANA|ElMMo3|microrna.org|MirAncesTar|miRDB|MirMAP|PITA|RepTar|RNAhybrid|TargetSpy
TRAM2	Q15035		hsa-miR-28-5p	0.38785354	11	Very High	BCmicrO|DIANA|ElMMo3|MBStar|MirAncesTar|miRDB|MirMAP|miRTar2GO|Mirza-G|RepTar|TargetRank
CPEB4	Q17RY0		hsa-miR-28-5p	0.387784559	7	Very High	BCmicrO|Cupid|MirAncesTar|miRTar2GO|MultiMiTar|RepTar|RNAhybrid
APEX2	Q9UBZ4		hsa-miR-28-5p	0.38715104	12	Very High	BCmicrO|BiTargeting|DIANA|ElMMo3|MBStar|microrna.org|MirAncesTar|miRDB|MirMAP|miRTar2GO|Mirza-G|RepTar
GDF11	O95390		hsa-miR-28-5p	0.387050968	11	Very High	BCmicrO|Cupid|DIANA|ElMMo3|MBStar|microrna.org|MirAncesTar|MirMAP|miRTar2GO|Mirza-G|RNAhybrid
EPG5	Q9HCE0		hsa-miR-28-5p	0.387042867	13	Very High	BCmicrO|BiTargeting|DIANA|ElMMo3|MBStar|MirAncesTar|miRDB|MirMAP|MultiMiTar|PACCMIT|PITA|RepTar|RNAhybrid
WDR26	Q9H7D7		hsa-miR-28-5p	0.386970503	12	Very High	BCmicrO|DIANA|ElMMo3|MBStar|microrna.org|MirAncesTar|MirMAP|miRTar2GO|MultiMiTar|RepTar|RNA22|RNAhybrid
SH3D21	A4FU49		hsa-miR-28-5p	0.386941669	12	Very High	BCmicrO|BiTargeting|CoMeTa|DIANA|MBStar|microrna.org|MirAncesTar|MultiMiTar|PACCMIT|RepTar|RNA22|RNAhybrid
ADGRF5	Q8IZF2		hsa-miR-28-5p	0.386793686	13	Very High	BCmicrO|DIANA|ElMMo3|MBStar|microrna.org|MirAncesTar|miRDB|MirMAP|MirSNP|Mirza-G|RepTar|RNAhybrid|TargetRank
AFF2	P51816		hsa-miR-28-5p	0.386342919	9	Very High	BCmicrO|CoMeTa|DIANA|MBStar|MirAncesTar|MirMAP|MultiMiTar|RepTar|RNAhybrid
CPEB3	Q8NE35		hsa-miR-28-5p	0.386143773	7	Very High	BCmicrO|MBStar|MirAncesTar|miRTar2GO|MultiMiTar|PITA|TargetScan
MLEC	Q14165		hsa-miR-28-5p	0.386091861	12	Very High	BCmicrO|BiTargeting|DIANA|ElMMo3|MBStar|MirAncesTar|MirMAP|miRTar2GO|MultiMiTar|PITA|RepTar|RNAhybrid
IL17RD	Q8NFM7		hsa-miR-28-5p	0.385955267	11	Very High	BCmicrO|BiTargeting|DIANA|ElMMo3|MBStar|MirAncesTar|miRDB|MirMAP|PITA|RepTar|TargetRank
PIP4K2C	Q8TBX8		hsa-miR-28-5p	0.385328914	13	Very High	BCmicrO|BiTargeting|CoMeTa|DIANA|ElMMo3|MBStar|microrna.org|MirAncesTar|MirMAP|miRTar2GO|PITA|RepTar|RNAhybrid
SH3PXD2B	A1X283		hsa-miR-28-5p	0.385308393	13	Very High	BCmicrO|DIANA|ElMMo3|MBStar|MirAncesTar|miRDB|MirMAP|miRTar2GO|Mirza-G|PITA|RepTar|RNAhybrid|TargetSpy
KRT82	Q9NSB4		hsa-miR-28-5p	0.385284949	12	Very High	BCmicrO|DIANA|ElMMo3|microrna.org|MirAncesTar|miRDB|MirMAP|MirSNP|Mirza-G|PITA|RepTar|RNAhybrid
MIGA1	Q8NAN2		hsa-miR-28-5p	0.385105976	13	Very High	BCmicrO|DIANA|ElMMo3|MBStar|microrna.org|MirAncesTar|miRDB|MirMAP|miRTar2GO|Mirza-G|RepTar|RNA22|TargetSpy
PDE1B	Q01064		hsa-miR-28-5p	0.385003303	13	Very High	BCmicrO|BiTargeting|CoMeTa|DIANA|ElMMo3|microrna.org|MirAncesTar|miRDB|MirMAP|MirSNP|MultiMiTar|RepTar|RNAhybrid
PITPNA	Q00169		hsa-miR-28-5p	0.384678967	8	Very High	BCmicrO|DIANA|microrna.org|MirAncesTar|MirMAP|miRTar2GO|MultiMiTar|RepTar
ZNF589	Q86UQ0		hsa-miR-28-5p	0.384550083	13	Very High	BCmicrO|BiTargeting|CoMeTa|DIANA|ElMMo3|microrna.org|MirAncesTar|miRDB|MirMAP|miRTar2GO|Mirza-G|RepTar|RNAhybrid
SH2B3	Q9UQQ2		hsa-miR-28-5p	0.384408682	12	Very High	BCmicrO|CoMeTa|DIANA|ElMMo3|MBStar|MirAncesTar|miRDB|MirMAP|Mirza-G|RepTar|RNAhybrid|TargetRank
VANGL1	Q8TAA9		hsa-miR-28-5p	0.384209163	12	Very High	BCmicrO|BiTargeting|ElMMo3|MBStar|MirAncesTar|miRDB|MirMAP|miRTar2GO|MultiMiTar|RepTar|RNA22|RNAhybrid
ADAM33	Q9BZ11		hsa-miR-28-5p	0.384177319	10	Very High	BCmicrO|BiTargeting|ElMMo3|MBStar|microrna.org|MirAncesTar|RepTar|RNAhybrid|TargetRank|TargetSpy
SOBP	A7XYQ1		hsa-miR-28-5p	0.384099089	11	Very High	BCmicrO|DIANA|ElMMo3|MBStar|MirAncesTar|MirMAP|miRTar2GO|MultiMiTar|RepTar|RNAhybrid|TargetSpy
TNS4	Q8IZW8		hsa-miR-28-5p	0.383927447	14	Very High	BCmicrO|BiTargeting|DIANA|ElMMo3|MBStar|microrna.org|MirAncesTar|miRDB|MirMAP|MirTar|PITA|RepTar|RNAhybrid|TargetSpy
INSR	P06213		hsa-miR-28-5p	0.38392044	10	Very High	BCmicrO|DIANA|ElMMo3|MBStar|MirAncesTar|MirMAP|miRTar2GO|MultiMiTar|PITA|RepTar
ZNF322	Q6U7Q0		hsa-miR-28-5p	0.383827354	13	Very High	BCmicrO|BiTargeting|DIANA|ElMMo3|MBStar|microrna.org|MirAncesTar|miRDB|MirMAP|Mirza-G|MultiMiTar|RepTar|TargetSpy
WDFY1	Q8IWB7		hsa-miR-28-5p	0.383673367	9	Very High	BCmicrO|Cupid|DIANA|MBStar|MirAncesTar|MirMAP|miRTar2GO|Mirza-G|MultiMiTar
TRIM14	Q14142		hsa-miR-28-5p	0.383606923	13	Very High	BCmicrO|BiTargeting|ElMMo3|MBStar|microrna.org|MirAncesTar|miRDB|MirMAP|miRTar2GO|Mirza-G|RepTar|RNAhybrid|TargetSpy
NUFIP2	Q7Z417		hsa-miR-28-5p	0.38357565	10	Very High	BCmicrO|DIANA|MBStar|MirAncesTar|MirMAP|miRTar2GO|Mirza-G|MultiMiTar|RepTar|RNAhybrid
ST20-AS1	Q8NBB2		hsa-miR-28-5p	0.383477004	6	Very High	BCmicrO|DIANA|MirMAP|MultiMiTar|RepTar|TargetScan
JADE2	Q9NQC1		hsa-miR-28-5p	0.3831138	12	Very High	BCmicrO|BiTargeting|CoMeTa|DIANA|ElMMo3|MBStar|MirAncesTar|miRDB|MirMAP|MultiMiTar|RepTar|RNAhybrid
SLC31A2	O15432		hsa-miR-28-5p	0.382547418	15	Very High	BCmicrO|BiTargeting|CoMeTa|DIANA|ElMMo3|MBStar|MirAncesTar|mirbase|miRDB|MirMAP|MirSNP|Mirza-G|PITA|RepTar|RNAhybrid
RNF220	Q5VTB9		hsa-miR-28-5p	0.38243005	11	Very High	BCmicrO|BiTargeting|CoMeTa|DIANA|microrna.org|MirAncesTar|MirMAP|miRTar2GO|MultiMiTar|RNA22|RNAhybrid
